# Supplementary material for: Unravelling the Long Non-Coding RNA Profile of Undifferentiated Large Cell Lung Carcinoma
Source: PubMed Central journal article supplement (PMC5890391; doi:10.3390/ncrna4010004), 2018-02-05
Supplement: ncrna-04-00004-s001.pdf [file ncrna-04-00004-s001.pdf]

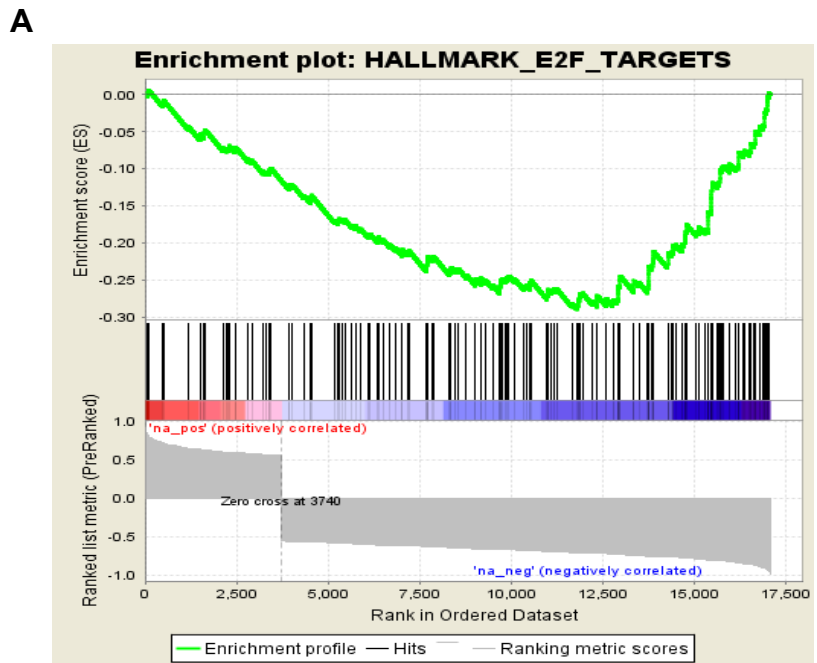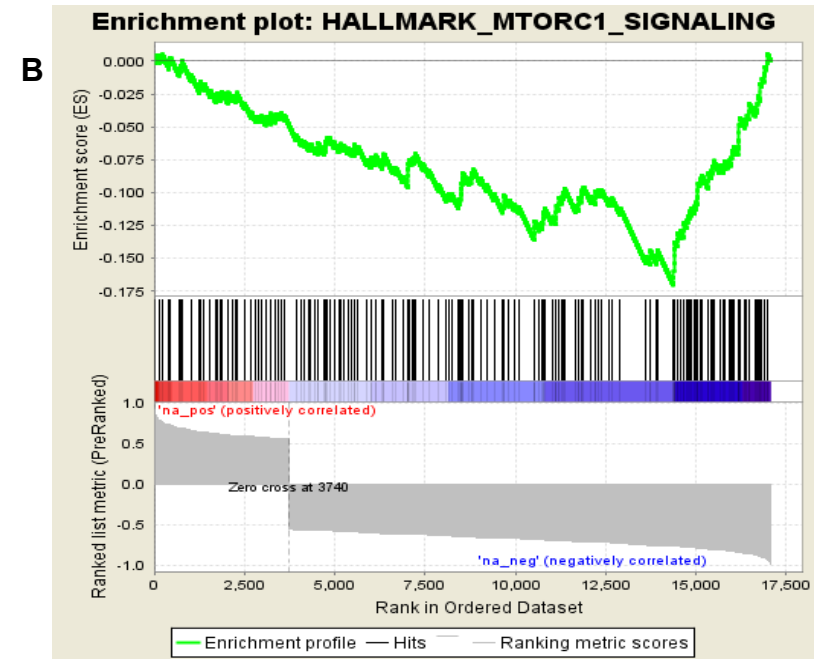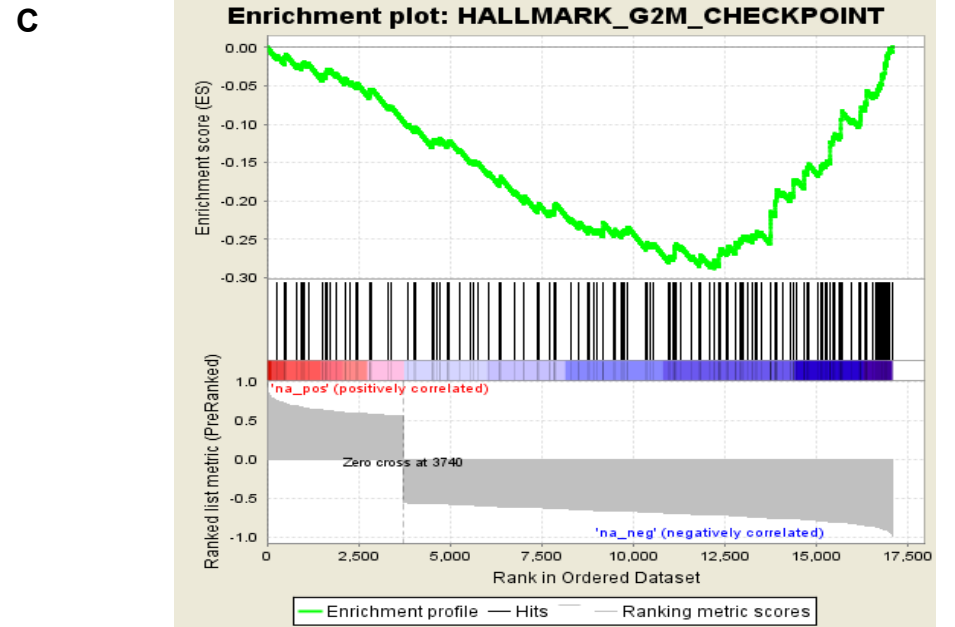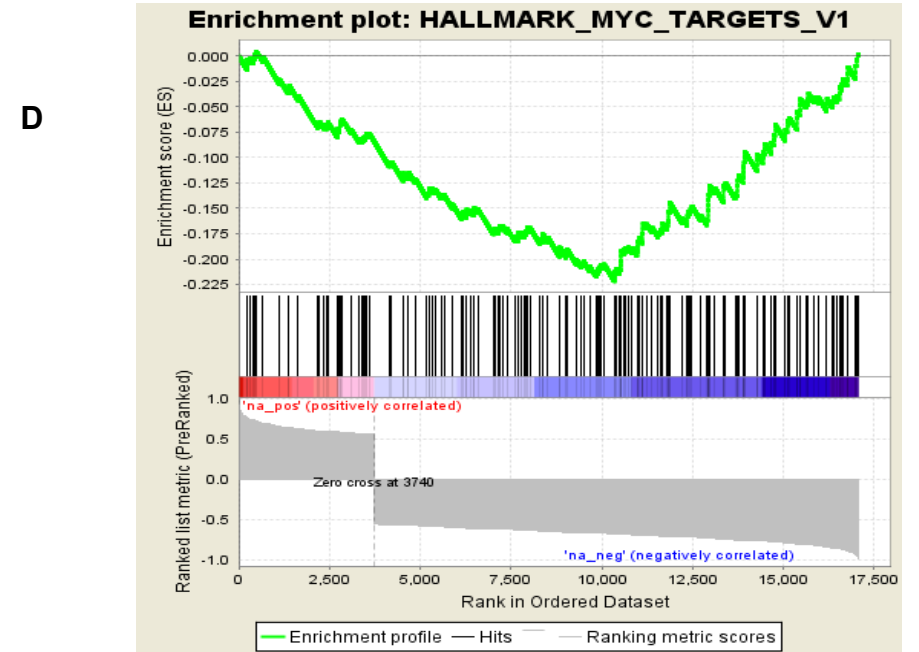

Supplimentary Figure 1- GSEA plot of all the significantly enriched data sets.

**Supplimentary table 1: Z scored expression of LncRNA used for Heatmap**

| gene name        | Large. | Large.Cell.1 | Large.Cell.2 | Large.Cell.3 | Large.Cell.4 | Large.Cell.5 | Large.Cell.6 | Large.Cell.7 |
|------------------|--------|--------------|--------------|--------------|--------------|--------------|--------------|--------------|
| RP11-480I12.3.1  | 0.86   | 1.92189      | -0.58257     | 0.293378     | -0.01075     | 0.298213     | -0.05745     | 1.426062     |
| PVT1             | 0.51   | 0.528962     | 2.805457     | 0.744063     | -0.23242     | 0.946929     | 0.644022     | -0.49832     |
| RP11-783K16.5.1  | 0.5    | 0.801134     | 2.382613     | 0.836208     | -0.88521     | 0.607387     | -0.02162     | 0.007917     |
| PPP2R3B-AS1      | -0.92  | 0.989577     | 0.554721     | 0.319507     | 0.775065     | 0.691629     | 0.665095     | 2.30364      |
| RP11-245J9.4.1   | -0.41  | 0.63698      | 0.500735     | 0.486873     | 0.211292     | 1.072923     | -0.02079     | -1.02992     |
| Z83851.4.1       | -0.48  | -0.19666     | -0.0449      | 0.521845     | -0.27177     | -0.128       | 0.097712     | -0.10842     |
| AC074117.10.1    | 0.26   | -0.04253     | 1.062745     | 1.612085     | -0.43519     | 1.177709     | 1.104093     | 1.995102     |
| RP11-539L10.3.1  | 0.77   | 0.142025     | 1.13385      | 0.555188     | -0.4964      | 0.330995     | 1.493892     | 2.285316     |
| RP5-1057J7.6.1   | -0.46  | 0.677257     | 0.850895     | 0.66216      | 0.467272     | 0.463049     | 0.60703      | 1.458551     |
| RP11-488L18.10.1 | -0.49  | -0.30316     | -0.25469     | 0.31528      | 0.849582     | 1.024589     | 1.763832     | 0.656867     |
| HCG25            | 1.28   | 0.528442     | 1.561257     | 1.442326     | -0.64416     | 1.395538     | 0.231245     | 0.726803     |
| CTD-3185P2.1.1   | 0.29   | -0.82716     | -1.31099     | -0.29855     | -0.79409     | -1.21484     | -1.31185     | 0.07118      |
| RP11-88I18.2.1   | -0.82  | -1.00625     | 0.712026     | -0.37935     | -0.96714     | -0.51031     | -0.76271     | -1.56367     |
| RP11-1008C21.2.1 | -0.37  | -1.16539     | -1.19518     | -1.07738     | -1.02855     | -0.56069     | 0.476905     | -0.99607     |
| RP11-65F13.2.1   | 0.46   | -1.11092     | -1.33234     | -0.26844     | -0.6921      | 0.358947     | -0.56037     | -1.23025     |
| RP11-361M10.5.1  | -0.23  | -0.3369      | 0.34032      | -0.62329     | -0.77064     | -1.17209     | -1.31612     | -1.11021     |
| AC008440.5.1     | -0.93  | -0.95175     | 0.933572     | -1.06045     | -0.83363     | -0.72615     | -0.79311     | -0.79234     |
| AC026150.8.1     | 0.35   | -0.54883     | -1.25287     | -0.71177     | -0.42918     | -0.26888     | -0.97498     | -1.14499     |
| RP4-575N6.4.1    | -1.15  | -0.2085      | -1.14747     | -1.14747     | -0.54181     | -0.69244     | 1.418168     | -1.14747     |
| ADAMTS9-AS2      | -0.77  | 0.290414     | -0.12756     | -1.14964     | -0.97121     | -1.0302      | -0.35149     | -0.72683     |
| AC093110.3.1     | -0.71  | -0.66593     | -1.0675      | -0.81012     | -1.02493     | -0.42814     | 0.07772      | -0.50064     |
| CTD-3107M8.4.1   | -0.54  | -0.95779     | -0.93333     | -0.81512     | -0.99672     | 0.998548     | -0.63256     | -0.75457     |
| RP11-327J17.3.1  | -0.74  | -0.75284     | -0.81046     | -1.01312     | -0.75491     | -0.89735     | -0.54652     | 0.753826     |
| SNRK-AS1         | -0.53  | 0.222692     | -0.63843     | -1.02188     | -1.05016     | -0.85196     | -0.46941     | -0.85044     |
| RP11-359M6.1.1   | -0.57  | -0.72405     | -0.854       | -0.854       | -0.06374     | -0.80841     | -0.71755     | -0.68843     |
| Gene Name        | Large. | Large.Cell.5 | Normal       | Normal.1     | Normal.2     | Normal.3     | Normal.4     | Normal.5     |
| RP11-480I12.3.1  | 1.86   | -0.25668     | -0.9502      | -0.9786      | -1.00393     | -1.0085      | -0.97401     | -1.00834     |
| PVT1             | 0.36   | 0.663446     | -0.77822     | -0.97369     | -0.98561     | -1.00814     | -0.8208      | -0.94415     |
| RP11-783K16.5.1  | 0.82   | 0.518555     | -1.03529     | -1.22476     | -1.17865     | -0.87361     | -0.79353     | -0.98579     |
| PPP2R3B-AS1      | -0.16  | 1.259965     | -1.10756     | -0.92865     | -0.7028      | -1.19477     | -0.86479     | -1.05102     |
| RP11-245J9.4.1   | 0.12   | 0.469447     | -0.77264     | -0.70208     | -0.9447      | -0.85422     | -0.48203     | -0.88608     |
| Z83851.4.1       | 0.82   | 0.084974     | -0.5088      | -0.70269     | -0.44348     | -0.69584     | -0.55515     | -0.59877     |
| AC074117.10.1    | 0.33   | -0.50947     | -0.87874     | -0.66406     | -0.9891      | -1.03763     | -0.75002     | -0.93837     |
| RP11-539L10.3.1  | 0.75   | -0.83098     | -0.3658      | -0.95442     | -0.57632     | -1.25212     | -0.86593     | -1.22639     |
| RP5-1057J7.6.1   | -1.06  | -0.1254      | -1.1267      | -0.90859     | -0.69803     | -1.26056     | -0.51733     | -0.90434     |
| RP11-488L18.10.1 | 0.38   | 1.69429      | -1.50685     | -0.95127     | -0.72639     | -1.68086     | -0.32595     | -0.79242     |
| HCG25            | 0.39   | -0.01436     | -0.78401     | -1.36278     | -0.26269     | -0.93511     | -0.98009     | -1.05217     |
| CTD-3185P2.1.1   | 0.39   | -0.47721     | 1.886034     | 1.021256     | 1.440811     | 0.518347     | 0.950973     | 0.478282     |
| RP11-88I18.2.1   | 0.03   | -0.05894     | 1.92301      | 1.536534     | 0.324327     | 0.767264     | 0.919081     | 0.741136     |
| RP11-1008C21.2.1 | 0.21   | 0.003409     | 1.270238     | 1.274225     | 1.88468      | 0.876676     | 0.516076     | 0.63115      |
| RP11-65F13.2.1   | -1.03  | -0.25618     | 0.813627     | 1.498033     | 0.919182     | 1.831534     | 0.57595      | 0.786737     |
| RP11-361M10.5.1  | -0.15  | -0.87541     | 0.900546     | 0.588532     | 0.638319     | 1.468652     | 1.055952     | 2.053302     |
| AC008440.5.1     | 0.26   | -0.56657     | 0.665814     | 1.105599     | 0.873782     | 2.229403     | 0.959471     | 0.372355     |
| AC026150.8.1     | -0.6   | -0.60454     | 1.508009     | 1.676522     | 0.843723     | 1.45478      | 0.295631     | 1.071462     |
| RP4-575N6.4.1    | -1.15  | 0.074523     | 1.300469     | 1.199934     | 0.781674     | 1.545202     | 0.197469     | 0.865233     |
| ADAMTS9-AS2      | -1.04  | -0.428       | 0.451568     | 2.205524     | 0.607617     | 0.636489     | 1.450127     | 1.324714     |
| AC093110.3.1     | -0.64  | -0.85709     | 0.565843     | 1.658647     | 1.292424     | 1.030729     | 1.245062     | 1.437329     |

|                 |       |          |          |          |          |          |          |          |
|-----------------|-------|----------|----------|----------|----------|----------|----------|----------|
| CTD-3107M8.4.1  | -1.02 | -0.3224  | 0.637064 | 1.474784 | 1.599301 | 1.463732 | 0.099332 | 1.186605 |
| RP11-327J17.3.1 | -0.66 | -0.75993 | 1.338793 | 2.170436 | 0.780465 | 1.32038  | 0.305247 | 0.71675  |
| SNRK-AS1        | -0.7  | -0.74493 | 1.844224 | 1.835349 | 0.820992 | 0.817532 | 0.59788  | 1.126696 |
| RP11-359M6.1.1  | -0.85 | -0.854   | 0.829953 | 1.969572 | 0.62322  | 1.497655 | 1.301927 | 1.048782 |



**Supplimentary table 2: GSEA analysis result**

| GS<br> follow link to MSigDB              | SIZE | ES       | NES      | NOM p-val |
|-------------------------------------------|------|----------|----------|-----------|
| HALLMARK_E2F_TARGETS                      | 194  | -0.28945 | -3.3461  | 0         |
| HALLMARK_G2M_CHECKPOINT                   | 194  | -0.2876  | -3.34217 | 0         |
| HALLMARK_MYC_TARGETS_V1                   | 191  | -0.22178 | -2.56817 | 0         |
| HALLMARK_MTORC1_SIGNALING                 | 192  | -0.1703  | -1.96826 | 0.00223   |
| HALLMARK_DNA_REPAIR                       | 138  | -0.17421 | -1.82737 | 0.008245  |
| HALLMARK_UV_RESPONSE_UP                   | 149  | -0.15779 | -1.69783 | 0.027242  |
| HALLMARK_UNFOLDED_PROTEIN_RESPONSE        | 110  | -0.16594 | -1.60063 | 0.031477  |
| HALLMARK_MITOTIC_SPINDLE                  | 185  | -0.13476 | -1.53536 | 0.053393  |
| HALLMARK_MYC_TARGETS_V2                   | 56   | -0.20054 | -1.49627 | 0.076517  |
| HALLMARK_COMPLEMENT                       | 187  | -0.12614 | -1.45447 | 0.082497  |
| HALLMARK_COAGULATION                      | 125  | -0.14556 | -1.45201 | 0.093381  |
| HALLMARK_EPITHELIAL_MESENCHYMAL_TRANSITIO | 194  | -0.12523 | -1.45125 | 0.075991  |
| HALLMARK_INTERFERON_ALPHA_RESPONSE        | 93   | -0.15259 | -1.37628 | 0.113043  |
| HALLMARK_HYPOXIA                          | 189  | -0.11151 | -1.29388 | 0.177654  |
| HALLMARK_SPERMATOGENESIS                  | 122  | -0.12797 | -1.28243 | 0.181273  |
| HALLMARK_BILE_ACID_METABOLISM             | 102  | -0.13458 | -1.25752 | 0.205346  |
| HALLMARK_PANCREAS_BETA_CELLS              | 35   | -0.19214 | -1.19741 | 0.231966  |
| HALLMARK_IL2_STAT5_SIGNALING              | 184  | -0.09899 | -1.12328 | 0.313348  |
| HALLMARK_APICAL_JUNCTION                  | 183  | -0.09535 | -1.07776 | 0.387097  |
| HALLMARK_IL6_JAK_STAT3_SIGNALING          | 81   | -0.11633 | -0.98355 | 0.47      |
| HALLMARK_KRAS_SIGNALING_DN                | 180  | -0.08034 | -0.91568 | 0.555051  |
| HALLMARK_APICAL_SURFACE                   | 40   | -0.13793 | -0.89649 | 0.574586  |
| HALLMARK_MYOGENESIS                       | 177  | -0.07818 | -0.89429 | 0.598425  |
| HALLMARK_ESTROGEN_RESPONSE_LATE           | 183  | -0.07791 | -0.89177 | 0.611364  |
| HALLMARK_PROTEIN_SECRETION                | 90   | -0.09265 | -0.834   | 0.666667  |
| HALLMARK_P53_PATHWAY                      | 187  | -0.07109 | -0.81796 | 0.708241  |
| HALLMARK_PI3K_AKT_MTOR_SIGNALING          | 93   | -0.0882  | -0.79369 | 0.713422  |
| HALLMARK_FATTY_ACID_METABOLISM            | 151  | -0.07181 | -0.77155 | 0.729025  |
| HALLMARK_GLYCOLYSIS                       | 188  | -0.06208 | -0.73002 | 0.775371  |
| HALLMARK_XENOBIOTIC_METABOLISM            | 175  | -0.05525 | -0.62188 | 0.892202  |
| HALLMARK_PEROXISOME                       | 99   | -0.06284 | -0.58917 | 0.921544  |
| HALLMARK_ALLOGRAFT_REJECTION              | 181  | -0.0519  | -0.58112 | 0.928171  |
| HALLMARK_NOTCH_SIGNALING                  | 29   | -0.07195 | -0.4139  | 0.995536  |

FDR q-val

0

0

0

0.029487

0.064603

0.128571

0.196976

0.242139

0.260554

0.290112

0.266446

0.245357

0.318393

0.417215

0.407126

0.420301

0.492647

0.592258

0.646863

0.791409

0.888647

0.883958

0.849508

0.818324

0.879145

0.870739

0.874173

0.873594

0.89876

0.984548

0.980921

0.95628

0.994683

Supplementary table 3: List of positive coregulated genes with top5 LncRNA

|            |          |          |            |                |  |
|------------|----------|----------|------------|----------------|--|
| RP11-480I1 | PVT1     | RP11-783 | PPP2R3B-/- | RP11-359M6.1.1 |  |
| RPP38      | TMX2     | FAM189B  | MYOZ3      | RAB36          |  |
| CDHR3      | PICALM   | ZNF217   | C3         | BPIFA1         |  |
| CCDC65     | TOX4     | BZW1     | 43347      | APOB           |  |
| C22orf15   | CHCHD4   | CPSF7    | CDK2AP2    | KCNIP2         |  |
| KCNRG      | TFG      | ZFR      | RGS9       | IFFO1          |  |
| WDR38      | PPP2R5E  | GTF2F1   | SIAE       | ZNF540         |  |
| HLA-DRB5   | GNPDA1   | VEGFA    | KIAA1456   | TRIM39-RPP21   |  |
| RSPH10B2   | CSNK1G3  | DAXX     | KCNE3      | CRYBA4         |  |
| SHH        | SLBP     | TRIM59   | NME5       | BPIFB2         |  |
| WFDC1      | FAM189B  | GPR152   | TMEM50B    | C12orf63       |  |
| PACRG      | RABGEF1  | EPS15L1  | C9orf135   | ITPR2          |  |
| TLL10      | PSMD8    | MRPL37   | GPX3       | OR2L13         |  |
| DNAAF1     | ERLIN1   | ITPK1    | GPX3       | CCDC54         |  |
| FAM154B    | PPRC1    | PPP2R5E  | AC006276   | FLT3           |  |
| FAM166B    | NCS1     | PLIN3    | SLC22A4    | ASB2           |  |
| PALM3      | PRKAR2A  | FTSJ1    | TNNI3      | RTBDN          |  |
| CAPSL      | RP11-80H | C1orf212 | UNC45B     | TTN            |  |
| APOBEC4    | API5     | MAT2A    | GHRL       | TXLNB          |  |
| PZP        | MRPS18B  | ASAH2B   | GRIN3B     | AGAP3          |  |
| DNAH12     | KIAA1161 | NAA25    | TMEM231    | PNPLA7         |  |
| TCTE1      | PFDN1    | DLG5     | LINGO4     | PSTPIP1        |  |
| SDR42E2    | METTL14  | ZFP1     | C13orf30   | AKAP6          |  |
| C1orf87    | FCF1     | METRNL   | AVPR2      | 43344          |  |
| IL12B      | GLRX3    | QTRTD1   | ORAOV1     | ZNF775         |  |
| WDR96      | ZDHHC3   | KIAA1161 | C10orf67   | DNER           |  |
| AKAP14     | ASNA1    | RRP1B    | FCGR2A     | RAB33A         |  |
| C13orf26   | RNF11    | PSG3     | RHBDL1     | DISP2          |  |
| C9orf117   | SAMD8    | IL17RD   | RP11-48B1  | PAN3           |  |
| LRRC18     | TOR1B    | SAP130   | C11orf70   | PPEF2          |  |
| C11orf88   | ARL8B    | ATG3     | H1FNT      | RIMS3          |  |
| C2orf73    | CAMKK2   | RAD9B    | DNAJC4     | TBC1D10C       |  |
| PPP1R36    | USP14    | TADA3    | TRPC6      | SLC2A6         |  |
| FAM179A    | PXK      | NCKIPSD  | BCAN       | ABCB1          |  |
| C1orf129   | C7orf70  | ATP5S    | SULT1A4    | SMCHD1         |  |
| GAS2       | C4orf3   | AP2A1    | C10orf107  | PAK3           |  |
| ENKUR      | ATG3     | RFT1     | CYS1       | CDKL1          |  |
| TMEM190    | DENR     | PRKAR1B  | KANK3      | FGD2           |  |
| OSCP1      | BEND3    | COMMD5   | ALDH3B1    | RIMBP2         |  |
| CCDC108    | MTPN     | CDCP1    | BAAT       | CACNA1H        |  |
| PPIL6      | RRAGC    | VPS8     | C16orf71   | KIF19          |  |
| KIAA1377   | VPS29    | TFG      | SERPINA1   | PMEL           |  |
| TTC40      | DCUN1D5  | TOX4     | IFT27      | RBMXL2         |  |
| DYDC1      | KLF10    | RCOR1    | RPP38      | EPHX2          |  |
| KIF6       | TMED2    | EIF3B    | HLA-DMA    | GIPR           |  |
| PPP1R32    | DBN1     | SH3D21   | TRIM49     | CASD1          |  |
| SLC47A1    | DCAF10   | FUS      | GATA5      | STAMBPL1       |  |
| C2orf77    | SHISA5   | ZFPL1    | CDHR3      | ZAP70          |  |
| PIH1D2     | HAUS6    | DYNC1LI1 | RP11-134E  | PALM2          |  |

|           |           |          |           |                   |
|-----------|-----------|----------|-----------|-------------------|
| NEK5      | OTUD4     | SBNO1    | CRYAA     | SYT7              |
| RNF175    | VEGFA     | PRPF40A  | C8orf73   | SSR4              |
| CCDC78    | LRRFIP2   | PTPRK    | PSENE1    | NLRP14            |
| RP11-503N | BCL2L2-P/ | RP11-80F | ODF3B     | CLEC12A           |
| LDLRAD1   | SLIRP     | YES1     | GTF3A     | KCNC4             |
| CCDC164   | KCNJ12    | KIF1C    | PLK5      | RP11-1286E23.12.1 |
| C20orf85  | ZFP91     | TMEM20   | ADHFE1    | UNC79             |
| HDLBP     | CLIC1     | DNTTIP1  | FAM209A   | GNLY              |
| AC002472. | EP400     | METTL2B  | ADH1A     | SLC17A7           |
| C6orf165  | TAF3      | GPR156   | FAM92B    | MYO7B             |
| FBXL13    | BMI1      | PFDN1    | RP11-505K | GABBR2            |
| ZMYND12   | DAXX      | SETD8    | CCDC65    | BDKRB1            |
| DNAI2     | SET       | SHMT1    | VSIG2     | UTS2              |
| CCDC42B   | KPNA4     | METTL14  | CINP      | PTPRN2            |
| C6orf103  | C10orf46  | SNTB2    | CINP      | ASB5              |
| PLL       | CBS       | SNTB2    | SERPINF2  | SMAD9             |
| AXDND1    | SNTB2     | DDTL     | SCGB3A2   | CLEC10A           |
| RSPH10B   | SNTB2     | DPF2     | C9orf24   | ASMT              |
| TRIM55    | TLE1      | PATL1    | BMP4      | C19orf45          |
| C16orf93  | CDK2AP1   | PSMD8    | SFTPD     | PIWIL4            |
| ANKRD18B  | ACTR10    | VPS33A   | SCGB1A1   | BIN2              |
| CDHR4     | FBXW8     | API5     | CCDC116   | FGF21             |
| CCDC135   | SLC38A2   | C3orf38  | C22orf15  | WNT1              |
| KRTAP5-8  | SAR1A     | MBOAT7   | TEKT3     | CNTN6             |
| LEAP2     | ARF4      | ENAH     | SPINLW1   | BTNL2             |
| UBXN10    | ZNF283    | RP11-93K | KAGER     | PRKCG             |
| ZNF474    | TMBIM1    | SCAP     | DLG4      | CYP2A6            |
| LRRC23    | C9orf41   | SCD      | TCTEX1D1  | MYOM2             |
| WDR63     | MTCH1     | RNF222   | DCDC5     | SPESP1            |
| DUSP13    | PATL1     | RAD18    | ZNF536    | LRRC9             |
| TPPP3     | ABCE1     | CENPN    | FITM1     | P2RX1             |
| HSD17B2   | PRRG1     | ESYT1    | CCDC17    | RASAL3            |
| AZU1      | PTPRK     | FAM120C  | PANX2     | CST1              |
| C1orf88   | POLR3F    | ATF2     | SLC46A3   | SLFNL1            |
| CCDC151   | CCNYL1    | PRKAR2A  | ECT2L     | MC5R              |
| KBTBD10   | SLC25A26  | PLEKHM2  | CACNG6    | LPL               |
| ABHD1     | RAP1B     | MAP4     | CDH19     | WDFY4             |
| CCDC87    | RBBP9     | DIABLO   | METRNL    | SNAI3             |
| PRB2      | IP6K1     | TCEB3B   | GLRX      | MIPEP             |
| FAM183A   | BEND6     | PSMC4    | ETV2      | VSIG4             |
| SPEF1     | BZW1      | NUP155   | HLA-DQB1  | DLGAP2            |
| C16orf48  | SCD       | BCORL1   | PRDM7     | TMEM119           |
| C19orf51  | BICD2     | HDGF     | C1orf141  | AC092165.4.1      |
| XAF1      | GTF2H3    | FAM83G   | NFKB2     | GPR12             |
| ABCB11    | ABTB2     | YY1      | SLC25A34  | DUSP26            |
| HLA-A     | RHOA      | BRAP     | OR1N1     | ARHGAP15          |
| SPATA17   | KLF11     | KCNJ12   | RGS22     | ARHGAP15          |
| LRRC10B   | MAP4      | EIF5A2   | HIGD2B    | C20orf132         |
| AC091172. | ASB6      | HIST1H2E | C9orf116  | FGF9              |
| HLA-B     | BCAR3     | SCO1     | FBXW10    | EPB42             |



|            |          |          |           |          |
|------------|----------|----------|-----------|----------|
| ADAT2      | ANKRD33  | GMPS     | RIIAD1    | LCN10    |
| RHCE       | EIF5A2   | MTAP     | SPATA9    | CYTH4    |
| AK7        | HMGA1    | FCF1     | RP3-369A1 | TUBB1    |
| SPATA18    | DCTPP1   | RPP40    | KIAA0408  | HSH2D    |
| NFE2       | SAP130   | C12orf43 | ANXA6     | SCML4    |
| AKR7A2     | ZNF395   | BCAR1    | AC008735  | GDA      |
| VIP        | C1orf212 | PLEC     | STOML3    | KCNQ4    |
| TRAF5      | PABPC3   | NGEF     | AKR1C3    | RNF128   |
| IL5RA      | SLC35F3  | GTF2H3   | KCNRG     | CST2     |
| ALKBH8     | HIATL1   | DDT      | RNASE13   | PHYHIPL  |
| C1orf222   | SPTLC1   | C7orf70  | DTHD1     | SHOX     |
| C17orf47   | UBE2E1   | ERRFI1   | DNAH9     | CXorf57  |
| IL29       | CRK      | CCL28    | WDR38     | GPR114   |
| CCDC81     | CSNK2A1F | SPATA2   | C1orf173  | PRR20C   |
| YSK4       | CBL      | NUDCD1   | HLA-DRB5  | FMO2     |
| RP11-268F1 | TEX10    | MKRN2    | SNTN      | NEUROD2  |
| AP000322.5 | PTPLA    | HIST1H2A | ARMC4     | JAKMIP2  |
| ROPN1L     | RAB5A    | EFNB2    | SEC14L3   | PRR4     |
| MAPK15     | SEC23IP  | KLC2     | NOTUM     | FAM189A1 |
| GSTA3      | UBA6     | DENR     | CRB1      | LIPC     |
| LUZP2      | PCDHB13  | ALDOA    | HLA-DPA1  | SLC35D3  |
| FHAD1      | PSD2     | UBA6     | PODNL1    | CDH17    |
| DNAJB13    | GPN3     | MLEC     | MORN5     | FAM113B  |
| HLA-DQA1   | MMP14    | TBC1D5   | RSPH10B2  | PLA2G12B |
| DYDC2      | CCDC62   | ZDHHC3   | ANKRD1    | CXCR6    |
| C2orf62    | KIAA1143 | RP11-286 | ZSCAN4    | KCNK17   |
| LIAS       | RAB35    | CAPN7    | NMUR1     | SNAP25   |
| CCDC147    | CENPN    | CAMKK2   | C5orf49   | CD1D     |
| RP11-368J2 | CSNK2A1  | FAM168A  | C1QTNF7   | GRIN2C   |
| NSUN6      | DPH3     | FAM205A  | SULT1A3   | HBE1     |
| C5orf20    | MAPK7    | NOLC1    | SHH       | CRLF1    |
| ERAP2      | NAA25    | TMX2     | WFDC1     | KRTAP3-2 |
| ABHD14A    | CLIC4    | PGAM5    | SCN11A    | MYL10    |
| UBAP1L     | DDX21    | C10orf2  | ABHD12B   | C16orf78 |
| CRYZL1     | PLIN3    | PRRC2B   | RBM24     | DNTT     |
| CETN2      | C22orf13 | DHX33    | FOLR3     | NROB2    |
| IDI2       | MCMBP    | GAL3ST2  | MEIG1     | ARSA     |
| ATG9B      | ZBTB38   | HDAC11   | MYEOV     | DDC      |
| LRRC29     | LRP12    | FOXK1    | WDR93     | OLIG2    |
| C6orf97    | TBC1D13  | TWF1     | EPHX1     | C3orf77  |
| AC022098.1 | TMEM43   | ACTA1    | SPNS2     | PK4      |
| DNAJC28    | COPS8    | PLK2     | HRASLS2   | CPXM2    |
| TPPP2      | C10orf90 | ASNA1    | C1orf189  | TSPAN11  |
| EFHC2      | ATF2     | RFX8     | AL359392  | IMPA2    |
| DNAH7      | BCORL1   | GYS1     | ORM1      | NPAS4    |
| HSF4       | OLA1     | ATG12    | RFX2      | CLEC1B   |
| CASC1      | ASAP1    | GATC.1   | TMEM212   | OPN4     |
| C1orf192   | UFD1L    | TAMM41   | VWA3B     | OR4C6    |
| C17orf72   | FOPNL    | POM121L  | UROC1     | GPR15    |
| DCST1      | FOXK1    | METTL16  | C9orf171  | OLIG3    |

|           |          |          |           |                |
|-----------|----------|----------|-----------|----------------|
| EFCAB10   | BACE2    | FBXW8    | PACRG     | ZNF732         |
| RIBC1     | DLG5     | ZNF654   | GLTSCR2   | TAGLN3         |
| DLEC1     | SBDS     | TULP1    | SHE       | ITGB7          |
| SEMA4G    | IL17RD   | MCHR1    | MYL3      | IL13           |
| JAKMIP3   | FBXW2    | WDR5     | TTLL10    | CCDC166        |
| C9orf174  | FAM105B  | C9orf40  | CXCL14    | RAB3C          |
| ZMYND10   | METTLL16 | C11orf91 | HHLA2     | TRIM72         |
| MSH4      | MBNL1    | BCAR3    | TTC16     | HAND2          |
| NUCB2     | ZFPL1    | PCDHGC5  | DNAAF1    | MUSK           |
| LRTOMT    | SETD8    | RCE1     | CXorf41   | HERPUD1        |
| CDRT4     | C12orf23 | KLHL31   | C2orf71   | GFRA4          |
| C6orf118  | OSGIN2   | KPNA4    | FAM154B   | FAM19A5        |
| GSDMD     | ANP32B   | RNF11    | TEKT1     | RP4-559A3.7.1  |
| FSIP1     | C14orf43 | HCCS     | OXT       | IHH            |
| RSPH1     | RALA     | TBX22    | GUCY2D    | FREM3          |
| ZNF429    | DSEL     | HMGA1    | TTC29     | FAM155A        |
| ALS2CR12  | PRICKLE1 | ZCCHC8   | C11orf54  | C9orf30-TMEFF1 |
| LTN1      | KHDRBS1  | FBN2     | LRRC46    | PVALB          |
| KIAA1841  | ACTA1    | AHSG     | DCDC2B    | PPP4R4         |
| IGFN1     | RYBP     | RRP9     | TMEM146   | PTPRCAP        |
| LRGUK     | ESYT1    | ZFP41    | CPVL      | SLAMF1         |
| MOCS1     | KLF7     | PKM2     | SPAG8     | MEF2B          |
| ZNFX1     | IPMK     | PSD2     | TNFSF14   | SLITRK2        |
| SPA17     | QRICH1   | KIAA0664 | FAM166B   | RGS21          |
| BTN3A2    | FOXP1    | RABGEF1  | HLA-DPB1  | IPO8           |
| HLA-G     | NPY      | RRAGC    | AGT       | CYP3A43        |
| CCDC153   | C5orf62  | GPN3     | ASMTL     | FRMD3          |
| CCDC96    | BNIP3L   | C7orf45  | DNAI1     | PPP1R17        |
| NPIPL3    | PGRMC2   | AK4      | PRG2      | CLEC3A         |
| SULT1A1   | VTI1A    | SH3GL1   | PALM3     | OSBPL1A        |
| EFCAB1    | AP3S1    | EP400    | PTPRM     | CHGA           |
| SULT1C2   | ENAH     | CCNK     | NOSTRIN   | CPZ            |
| CAPS      | SLC15A4  | NME2     | ZNF33A    | GALNTL6        |
| CES4A     | CARHSP1  | TLE1     | FBXW12    | MUCL1          |
| RSPH4A    | GATC.1   | C3orf23  | TBC1D17   | CHRN3          |
| RGPD5     | GPR113   | NCS1     | FOLR1     | NKX2-4         |
| DHDH      | GFAP     | HSF1     | CAPSL     | DCX            |
| NRL       | INSL3    | FAM129B  | TSPAN19   | NEFM           |
| PLA1A     | ARPC3    | IL1RL2   | APOBEC4   | MFSD2A         |
| C15orf26  | CTDSPL   | NMT2     | TBC1D12   | ANP32D         |
| RP11-231C | CT62     | SFSWAP   | C6        | AKAP4          |
| LCA5L     | SCAI     | BNIP3    | FAM81B    | HGF            |
| RTDR1     | EFNB2    | HSD3B7   | TNFAIP8L2 | TMEM59L        |
| FANK1     | RYR1     | PVRL3    | SLC27A3   | PRR20D         |
| MDH1B     | ATXN2    | SBDS     | PZP       | CABP7          |
| TEKT2     | WASL     | NCKAP1   | DNAH12    | ZIM2           |
| DYNC2H1   | C9orf30  | SLCO4A1  | CNTD2     | C5orf47        |
| PBLD      | C19orf67 | TIMM8A   | SAA2-SAA4 | ADAMDEC1       |
| C1orf158  | SYCE2    | JRK      | TCTE1     | MMP25          |
| RP11-190A | PURB     | AMOTL2   | SDR42E2   | KIAA1755       |

|            |          |          |           |                   |
|------------|----------|----------|-----------|-------------------|
| PANX3      | KLF16    | TMEM42   | MTBP      | FGF18             |
| IFT57      | MYBL1    | VPS37B   | TCTEX1D4  | CSF2RA            |
| TSPYL6     | NANP     | PI4K2A   | C1orf87   | PCDH9             |
| C9orf93    | CDKN3    | C11orf71 | NMBR      | NKX6-3            |
| STARD9     | RNF169   | PLOD2    | CEACAM1   | ELAVL4            |
| FAM22A     | TMEM69   | GNPDA1   | IL12B     | SLC17A9           |
| CCDC114    | C17orf39 | TOR1B    | ALOX15    | FAM9B             |
| CCDC88B    | ZNF367   | SCN5A    | WDR96     | NCF4              |
| TTYH1      | MIF      | ZC3H15   | RP11-1212 | AKR1D1            |
| PBX4       | NDUFAF2  | SEC23IP  | RPGR      | SLC38A8           |
| RXRG       | SDCCAG3  | DNAJC24  | TICAM2    | GPR142            |
| C2orf50    | CENPH    | UHRF1BP  | NPR1      | CITED4            |
| SPAG6      | TUBB6    | SLC9A8   | AKAP14    | SERPINA10         |
| PGCP.1     | HTRA1    | RALA     | ROS1      | GRP               |
| FAM22E     | TMEM23   | DPH3     | RBMY1J    | RP11-1286E23.18.1 |
| CCDC103    | FUS      | PSMD9    | TLR2      | CFC1              |
| OR5111     | DAG1     | SYNGAP1  | IFIT1B    | UGT2B4            |
| RILP       | PVRL3    | PURB     | ORM2      | BTBD18            |
| KIAA0319   | TBC1D25  | CARM1    | ANKHD1-E  | POMC              |
| PION       | GFOD1    | PPP1R15  | SPATA4    | FGL1              |
| IQCC       | GFOD1    | UBE2C    | CCR3      | CTAG2             |
| CAMKMT     | DGKI     | BEND3    | C13orf26  | PPT1              |
| USP43      | HDGF     | GBE1     | AC079354  | CELF3             |
| RP3-486B1  | CDCP1    | SMTNL1   | NKX6-2    | SLC2A7            |
| RP11-1396  | PXN      | MBNL1    | AK8       | ELAVL3            |
| WDR65      | AC011551 | KDM1B    | C18orf63  | RFX4              |
| RP11-10351 | KCTD11   | TBC1D15  | C9orf117  | RUNX1T1           |
| SLPI       | TCEB1    | PLK1     | LRRC18    | NROB1             |
| GLB1L2     | TMEM11   | CCDC58   | ATP1A2    | CYP26B1           |
| RP11-347C  | RAD9B    | PCDHGB4  | RP13-554M | STMN4             |
| TEKT4      | DLGAP4   | AP2S1    | MAL       | INHA              |
| COL18A1    | FKBP5    | KIAA1524 | C11orf88  | FAM154A           |
| AP4B1      | MMP16    | MTCH1    | C2orf73   | DHRS7C            |
| HERC5      | EID2     | RNF169   | PPP1R36   | ZNF642            |
| FABP6      | NUDT10   | UQCRC    | CC2D2B    | SETBP1            |
| IFI6       | CISD1    | LYAR     | FKBP6     | NNAT              |
| RP11-345J4 | TAF9     | BHLHE40  | C10orf68  | SHBG              |
| RCN3       | NLGN2    | ASB6     | PRAMEF12  | ESR2              |
| RGN        | RELL2    | ABCE1    | EVX1      | KCNU1             |
| SPATS1     | LSM3     | DUS4L    | IFLTD1    | CALCA             |
| KCNE1      | MET      | MED6     | ALOX15B   | IL17F             |
| CHRNA3     | TBC1D20  | ZNF283   | PTH1R     | ZNF835            |
| TLL9       | POFUT1   | LRRFIP2  | APOM      | SFRP5             |
| WDR86      | UBE2E2   | PLIN2    | DGCR6     | RNASE11           |
| IQCK       | AHRR     | UTP11L   | CTSH      | SLC14A2           |
| FAM18A     | RHOF     | PAQR7    | BSCL2     | KIR3DL3           |
| MNS1       | SPRYD7   | CDT1     | LIPJ      | KLK13             |
| HES5       | TTC7B    | ABHD5    | TTC18     | GP2               |
| C1orf123   | GPC1     | TMEM43   | EDN3      | NEUROD4           |
| LDHD       | AZ12     | GLT25D1  | FAM179A   | CTC-554D6.1.1     |

|           |          |          |           |                  |
|-----------|----------|----------|-----------|------------------|
| LRRC6     | RPA3     | PPP2R5D  | C1orf129  | RP11-548K23.11.1 |
| OAF       | DNTTIP1  | POFUT1   | WFDC6     | DYTN             |
| OAF       | APPL1    | RAB3IP   | MMP17     | NEUROD6          |
| C7orf57   | TBC1D15  | MPP5     | TXNDC3    | PTH2             |
| UBXN11    | PFDN4    | PCDHB13  | FAM47E    | NLRP13           |
| METTL18   | PGAM5    | DFFA     | GAS2      | GC               |
| EML6      | VRK3     | FAM105B  | CLYBL     | TAS2R1           |
| HLA-C     | TMC7     | SNX21    | ENKUR     | AC010872.2.1     |
| DIO1      | RBM12B   | SRSF9    | NKD1      | OR2Z1            |
| C9orf169  | TM9SF4   | ANKLE2   | RAB36     | SPAG11B          |
| PAQR6     | ITPK1    | MIF      | DGAT2     | RESP18           |
| RP11-347C | HRH1     | GPC1     | KCNQ2     | IL22             |
| PRDX1     | VEGFC    | FTMT     | RSPO1     | CST9             |
| SLC35A1   | MRAS     | LLGL1    | NKAPL     | BARHL1           |
| KLF8      | ZNF585A  | NPY      | SAA2      | HIST1H2BA        |
| FAM22D    | PHOX2A   | TRNT1    | ZSWIM2    | OR52N5           |
| RNASET2   | C6orf57  | NOXO1    | HLA-F     | GAGE12B          |
| LACE1     | TRIML2   | C19orf67 | TMEM190   | MFRP.1           |
| BTBD16    | DYNLL1   | HIST1H2E | CCDC101   | KRTAP9-9         |
| KLHL35    | ZNF805   | NIP7     | SIDT2     | GIF              |
| MOGAT2    | TTC28    | CPA4     | AC011443  | MTNR1B           |
| NEK11     | CSNK2A2  | PSG2     | MAEL      | TNP1             |
| MDN1      | RILPL1   | GFOD1    | HLA-E     | CARTPT           |
| PRKAG2    | FAM83G   | GFOD1    | NPIPL1    | TMCO2            |
| AIFM3     | TNFRSF11 | C1orf182 | ANKRD34E  | AC013269.5.1     |
| SIPA1     | SNRPC    | DHX37    | BPIFA1    | ZNRF4            |
| UPK2      | TPM4     | ART1     | CD164L2   | FAM47A           |
| KPNA7     | PPM1F    | ARF4     | C1orf227  | GPR119           |
| BIRC7     | STAC     | ATP6V0A  | OSCP1     | DEFB121          |
| C17orf57  | YWHAG    | KLF16    | UCN3      | OR51G1           |
| C19orf71  | VPS26A   | TBC1D13  | FAM116B   | GJA8             |
| GRIA4     | HIST1H2B | MTCH2    | FAM71F2   | RP11-234B24.6.1  |
| REC8      | SPEM1    | TMPPE    | RP11-46C2 | OR2M4            |
| LRP2BP    | LOX      | IFRD2    | SPINK4    | GPR139           |
| RSPH9     | ODZ3     | C8orf33  | DES       | COX7B2           |
| SPAG17    | AGFG1    | CES2     | INSIG2    | GAGE1            |
| MTIF3     | MTDH     | TRIAP1   | TMPRSS7   | SYT5             |
| RABL2A    | KDM1B    | EXOSC3   | TTR       | NEUROD1          |
| GSTK1     | POLR3G   | CDKN3    | ADCY7     | NPPB             |
| MZF1      | FUT5     | TTC9C    | WDR16     | CFC1B            |
| KRTAP5-10 | SLC35G6  | DGKI     | CREB3L3   | SYT4             |
| PCSK4     | ITGB1BP1 | RCOR2    | CCDC108   | BARHL2           |
| TMC4      | CBLL1    | UFD1L    | PPIL6     | GAGE12H          |
| CRISP2    | FAM210A  | OR2B6    | CEP192    | CALB1            |
| KATNB1    | ITPR1    | RNF24    | PIK3CD    | SOX3             |
| LRRC71    | SERPINE1 | SNAPC1   | FKBP2     | GAGE12D          |
| GMPR      | NPW      | ARPC4    | KIAA1377  | KLHL6            |
| STAC3     | C4orf43  | PICALM   | NPAS1     | ZFP42            |
| SLC34A3   | KIAA1715 | ADAM11   | PLIN5     | SIM1             |
| RYR3      | RBM7     | APPL1    | PEBP4     | UBE2QL1          |

|           |           |          |           |                  |
|-----------|-----------|----------|-----------|------------------|
| ZBBX      | CCNH      | PCF11    | MS4A14    | CCKAR            |
| IFT172    | LRRTM1    | FAM207A  | CCDC11    | PCSK1            |
| CCDC19    | S100A2    | AHNAK2   | OVCH1     | SMPD3            |
| MORN2     | DPM1      | PRIM1    | SULT1A3.1 | GAGE12E          |
| DNAH6     | HAS2      | FBXW2    | CATSPER4  | GAGE12C          |
| NWD1      | RAB32     | MYBL1    | C4orf47   | LRRTM3           |
| ZNF778    | SHC1      | ZNF790   | SPDYA     | ACCN1            |
| SAMD15    | BNIP3     | IER5L    | CDA       | SLC7A14          |
| EXOC3L1   | PPP1R10   | GLRX3    | PTCHD1    | AGBL1            |
| INF2      | PLK2      | LVRN.1   | FGFBP2    | POU3F3           |
| ABCC6     | ADD2      | GPR113   | MAP6      | RP11-77K12.1.1   |
| CYP46A1   | C17orf104 | MET      | TTC40     | GNRH2            |
| TTC21A    | DNAJC25   | HIF1A    | RASL10A   | PHGR1            |
| THADA     | CPSF7     | HIF1A    | FABP3     | CGA              |
| GNL2      | PPP1R3F   | MRAS     | CUBN      | KIF5C            |
| BHMT2     | OGG1      | SLC10A4  | ALG9      | MYBPC3           |
| GCC2      | ATE1      | TM9SF4   | DYDC1     | UGT3A1           |
| CPLX3     | LHX6      | VPRBP    | LRRC48    | PASD1            |
| SWSAP1    | C16orf5   | CDKN2AII | DPCR1     | KCNK16           |
| EFCAB2    | C16orf5   | DAG1     | C9orf85   | C4orf50          |
| C6orf225  | PCBP3     | CHAT     | CCDC102A  | SLC38A11         |
| DCXR      | METRNL    | OGG1     | AKR1C1    | PHF21B           |
| RIBC2     | PNMA1     | OXSRI    | KIF6      | KIR3DL1          |
| ABCC10    | DCBLD2    | KPNA6    | L1TD1     | PRLHR            |
| WRB       | DCT       | FAM25E   | TSPY8     | EPHA5            |
| FAM54B    | COL6A1    | ZNF578   | CFB       | CRH              |
| ZMAT1     | CMTM6     | CA13     | PPP1R32   | TBC1D8B          |
| LRRC43    | TRPC1     | ANKRD33  | ADH6      | KCNJ3            |
| MESP1     | FUBP3     | BACE2    | FXD2      | SCN3A            |
| RP11-542P | PSIP1     | CAMKV    | 43169     | TAS2R3           |
| CNKSRI    | GLIPRI    | SIGLEC11 | NTN4      | PTPRN            |
| RBM1B     | TRIM7     | ADORA2E  | GOLGA6A   | SSPN             |
| LRRIQ1    | MTX3      | CHCHD4   | CCDC122   | KRTAP1-5         |
| TARSL2    | SMARCB1   | DLGAP4   | CCR9      | RP11-1286E23.4.1 |
| CAT       | BBS7      | HIST1H2A | CARNS1    | HMP19.1          |
| KLHL3     | VPS33A    | TOMM70   | ABCC2     | STMN2            |
| MECR      | ODZ2      | C16orf5  | OSTBETA.1 | ASB15            |
| UBQLNL    | SLC13A5   | C16orf5  | MUC12     | KL               |
| MORN3     | HPD       | LHB      | ASB4      | KIAA0825         |
| CDK10     | C11orf20  | PABPC3   | RBM1E     | KIAA0825         |
| ARHGAP4   | BIVM      | PAICS    | ODZ4      | GYPA             |
| C6orf108  | FXR2      | FAM46B   | ODZ4      | KLK9             |
| PATL2     | TMPPE     | HAUS6    | TM4SF4    | FCRLA            |
| FAM22B    | PCGF6     | PPP2R4   | SLC47A1   | RGAG1            |
| DNAH3     | ST3GAL1   | RYR1     | PCSK2     | CYBB             |
| ZNF211    | ADAMTSL   | WDR87    | BCO2      | INSM2            |
| MST1      | SNX12     | NOC4L    | C21orf62  | LRFN5            |
| RPL4      | ZNF568    | PHF13    | MUC5AC    | ZNF684           |
| SRPK3     | HSF1      | CSNK2A1  | MUC5AC    | KIR2DL1          |
| C11orf52  | FOXL2     | SNTA1    | SPRYD5    | DCAF12L1         |

|           |          |          |          |                 |
|-----------|----------|----------|----------|-----------------|
| KIAA1407  | MRPL49   | PNMA1    | PDZD9    | TRIM49L1        |
| IQUB      | EHD2     | TRIP6    | APOH     | ANKRD6          |
| ZNF600    | GDF6     | EIF2A    | FGF19    | PHOX2B          |
| C1orf194  | CILP2    | MAMSTR   | C2orf77  | GAGE12J         |
| PPP2R5A   | MBTPS2   | CDK19    | CLEC12B  | RLBP1           |
| TARBP1    | ZNF385D  | SLC13A5  | HLA-DRA  | INSM1           |
| QRICH2    | ASAH2B   | SUMO3    | BPIFB1   | C10orf54        |
| NOL3      | DIABLO   | C7orf29  | A1CF     | MYCL1           |
| RGS11     | CHRM4    | SERPINE1 | CHI3L2   | NBPF4           |
| ACTR3C    | TGIF2LX  | PPM1F    | LECT1    | OTOP2           |
| HYDIN     | MTAP     | C3orf26  | C20orf26 | TDRD6           |
| SIL1      | DNAJC24  | MYBBP1A  | SLC6A18  | CDK5R2          |
| ZNF775    | GJC1     | DBN1     | RBM44    | IL17REL         |
| CCDC41    | METTLL11 | BICD1    | SULT1C3  | TRIM9           |
| KRTAP5-9  | RP11-630 | RFPL1    | BMP15    | CD79A           |
| BTN3A3    | FSCN1    | GRIK4    | FSCB     | DIO2            |
| RBKS      | FAM194A  | NDUFAF3  | C19orf75 | UMOD            |
| TTLL3     | STX1B    | CGB5     | PRNT     | TPH1            |
| DNAH2     | DHFR     | TCTA     | PPP1R3A  | WFDC10A         |
| PRR5      | RGS20    | CDKN2A   | ADAD1    | POU2F2          |
| IQCD      | CDKN2A   | OPA3     | TRIM64B  | ARMS2           |
| TMUB1     | GORASP2  | MRPL11   | MUC5AC   | PRODH2          |
| LENG1     | C9orf40  | ASF1B    | MUC5AC   | SLC25A21        |
| ASB18     | LHB      | C10orf90 | ZNF33B   | LCN15           |
| OXER1     | GPR78    | CORO1C   | FBXO40   | VGFB            |
| TNNI2     | C8orf33  | ARSK     | AC069154 | CD27            |
| TJP3      | CPT1C    | ARL13B   | ZNF83    | C12orf53        |
| KCNH3     | PPAPDC1  | MYC      | TMPRSS15 | MORC1           |
| DZIP1L    | NTAN1    | RELL2    | BHMT     | ZMPSTE24        |
| THUMPD2   | KLF12    | DRAP1    | GPX2     | GOLGA6L2        |
| SEC16B.1  | LRRN1    | C12orf52 | HLA-DRB1 | MBP             |
| OBP2B     | ERRFI1   | BRPF1    | TMEM232  | SLAMF7          |
| ZNF441    | FAM127A  | AHRR     | CTAGE4   | RP1-310O13.12.1 |
| CLUAP1    | IFITM2   | SOX12    | UGT1A5   | BEND4           |
| BCL7C     | SRSF9    | OLA1     | MLKL     | FSTL5           |
| CCDC37    | CAV2     | TMC7     | ALPPL2   | SST             |
| EPS8L1    | NUDT11   | MTFMT    | CPB2     | ZNF643          |
| PSORS1C2  | WBP2NL   | KIAA0947 | PTPN22   | TRPM8           |
| TMEM161A  | ZNF208   | TMEM23   | PIH1D2   | OR7C1           |
| FCGRT     | WNK4     | TM4SF19  | PI16     | MYF6            |
| C6orf163  | PRR16    | CCDC62   | CYP2F1   | PNOC            |
| NLRC5     | IL11     | EIF4A1   | ATP5I    | TM4SF5          |
| C12orf10  | ARPC4    | SET      | C14orf45 | RFX6            |
| ZNF132    | RNF24    | XRRA1    | MYBPHL   | GALR1           |
| CCDC130   | ZNF790   | AP2M1    | FAM186A  | C20orf196       |
| EIF3C     | PRAF2    | MRPS22   | UNCX     | SCN3B           |
| MIIP      | TMEM158  | FAM127A  | OPALIN   | NEUROG2         |
| DYX1C1-CC | PPP2R4   | CCDC51   | NEK5     | CPLX2           |
| VARS2     | FOSL1    | PXN      | FAM183B  | TRIT1           |
| C3orf25   | MAGEA8   | FAM25A   | DYNLRB2  | CYP2A7          |

|          |          |          |           |                  |
|----------|----------|----------|-----------|------------------|
| NFASC    | HABP4    | SPEM1    | RP11-718C | RBFOX1           |
| CCS      | ZNF718   | PRICKLE3 | ELANE     | NCF1             |
| CFTR     | FAM57A   | PPP6R1   | RNF175    | PGLYRP1          |
| TMEM88   | NOL9     | PPAPDC1  | EYA4      | IGFL4            |
| C7orf63  | GNG12    | TSGA10   | CCDC78    | LILRB1           |
| C1orf114 | RMI1     | ZNF787   | RP11-503M | KCNA6            |
| CCDC111  | NMT2     | GOLGA3   | USHBP1    | DERL3            |
| MED25    | DKK1     | RBM14    | FAM179B   | SYP              |
| TRAPPC6A | ARL6IP6  | DVL2     | RIMBP3C   | GADL1            |
| BEST4    | CLDND2   | HIF1AN   | XDH       | PCP4             |
| RABGAP1L | CCDC38   | HIGD1C   | TSPAN7    | TM7SF4           |
| CWC15    | MAML1    | COPS8    | AC007405  | GAGE2A           |
| SDF2L1   | SAP30    | CLIP2    | TMEM27    | NKX2-2           |
| ATP6V0A4 | NPBWR1   | MTHFD1L  | LDLRAD1   | CRABP1           |
| EFHC1    | OVCH2    | TRIP13   | CCDC33    | NFYC             |
| IK       | MT1M     | APLN     | GDPD3     | AGPAT2           |
| RNF224   | PCNP     | AC01155  | FIGF      | CEACAM21         |
| USP15    | TSGA10   | PPP1R10  | OR5B12    | FKBP11           |
| ADK      | RPL24    | BICD2    | CCDC164   | LY9              |
| C3orf15  | UBE2Z    | RP4-576F | RP11-1212 | KCTD4            |
| CXorf22  | HRK      | TNFRSF11 | LYRM1     | RP11-1280I22.1.1 |
| TFB1M    | FBXO27   | RILPL1   | TMEM114   | HNF4A            |
| ANK3     | IQCF1    | MCMBP    | AKR1C2    | ZIC3             |
| C3orf32  | TMEM14E  | BBS7     | CA4       | MAPK4            |
| NEK10    | SAMD4B   | UBE2V1   | TMEM132   | THBS4            |
| HSD17B4  | GNAI2    | VAMP3    | C20orf85  | AMPD1            |
| MIA2     | FAM127C  | GPR78    | MRPS31    | CPNE5            |
| C19orf44 | SDCBP    | MT1A     | GALM      | MPHOSPH8         |
| IRX5     | PDP1     | UBFD1    | NRN1L     | JAM3             |
| ACSM3    | MRPS30   | QRICH1   | HDLBP     | ANGPTL3          |
| HYOU1    | LRRC3    | KHDC1L   | AC002472  | GAGE12F          |
| ALDH1L1  | CCNK     | CARHSP1  | TRIM49L2  | LIN28A           |
| APRT     | PPT2     | ERLIN1   | NGB       | IGFBPL1          |
| TMEM213  | LVRN.1   | FGF11    | LCN2      | C8orf80          |
| TNNC1    | MNT      | RPA2     | DNAH10    | GAGE12G          |
| ALDH5A1  | AXL      | CTSA     | OR52L1    | CALCB            |
| CCDC13   | RP11-122 | CCNH     | C6orf165  | NAA16            |
| CCDC13   | DLGAP3   | SYCE2    | GTSF1L    | FAM22F           |
| OBSCN    | ANKLE1   | C9orf78  | CABYR     | ST18             |
| NDUFA7   | GDNF     | KLC3     | SLC25A28  | OR51B2           |
| DOCK6    | KCNA7    | KRTAP5-ε | OVGP1     | HTR1F            |
| MAT1A    | NGEF     | PDP1     | C1orf167  | SLC39A5          |
| FAM86C1  | HSCB     | MLXIP    | CDH15     | NBPF6            |
| FOXJ1    | PLEC     | METTL11  | FBXL13    | DEM1             |
| FAM188B  | SH2D5    | PSMD6    | TEPP      | SMAP2            |
| NDUFS7   | TTC34    | PPRC1    | B3GNTL1   | TAC3             |
| FUT2     | HIST1H2A | C10orf11 | SLC26A9   | SLC18A1          |
| WDR35    | LYRM7    | GBX2     | ZMYND12   | REG4             |
| RNF223   | GBX2     | C10orf46 | CAPN3     | KRTAP1-3         |
| YIPF2    | BRK1     | PRAMEF1  | MYOM1     | KCNK9            |

|           |           |          |            |            |
|-----------|-----------|----------|------------|------------|
| C16orf62  | UBL5      | STAC     | CDADC1     | C8orf47    |
| C1orf63   | C10orf114 | GPHN     | DNAI2      | PGLYRP2    |
| CLK3      | FAM102A   | SCARB1   | CCDC42B    | FAM46D     |
| RRP12     | EPC2      | NADKD1   | C6orf103   | SGCZ       |
| PALMD     | APLN      | YKT6     | CST5       | MXN1       |
| NME9      | GNA12     | CCDC38   | FAM125A    | KIR3DL2    |
| ZNF18     | TH        | IL28B    | TMEM143    | CHGB       |
| AGAP4     | UQCRQ     | DNAJB12  | AKR7A3     | SLAMF8     |
| C6orf70   | FBXO47    | CCNYL1   | ALG8       | TSGA10IP   |
| ASPSR1    | GPHN      | ERCC2    | TINAG      | TFF1       |
| GCOM1     | YWHAE     | ATG9A    | TPSG1      | BHLHA15    |
| ANO1      | PCDHGA1   | SLC9A7   | C16orf95.1 | NR1H3      |
| ATAD3C    | SPANXB2   | HSF2BP   | PLLP       | BTBD17     |
| TSNAXIP1  | HAPLN1    | ABTB2    | PPIAL4D    | MTMR7      |
| DAK       | LRRN4CL   | NCAN     | PTGDR2     | GABRR3     |
| TAF1C     | HEPN1     | C11orf95 | SEC31B     | OR9A2      |
| C11orf63  | NDST3     | SNX15    | CXorf1     | TLR8       |
| CHN2      | DCAF16    | CSRP3    | C2orf81    | CXCR3      |
| TLR3      | CPEB1     | TOP3A    | RP11-343C  | ST6GALNAC4 |
| VWA3A     | C10orf14C | GAPDHS   | AXDND1     | SIGLEC10   |
| CNTRL     | MT1X      | WNK4     | CC2D2A     | MGAT4C     |
| ZNF611    | CCL28     | TRIB3    | SNTG2      | CCBL1      |
| CYP4A11   | PRRT4     | SLC18A3  | NOD2       | PAH        |
| OFD1      | DPF2      | SLC34A1  | ANKRD31    | EVX2       |
| SPECC1    | PFN1      | ZFR2     | C19orf80   | FAM123C    |
| DDIT4L    | OR11H1    | DDIT4    | DPP7       | U2AF1L4    |
| EIF2D     | CRTAP     | MAP7D3   | LOXHD1     | HRH3       |
| RP11-934B | ATP6V1C1  | PRRT4    | C11orf34   | ATP1A4     |
| ITGA10    | MED22     | TGFBI    | NOTO       | SEZ6L      |
| CCNB3     | PSMD9     | SPATA25  | MMP13      | RALGAPA1   |
| BBS2      | SLC12A8   | CSNK2A2  | RSPH10B    | GLDC       |
| PCP2      | PDYN      | FBXO27   | YPEL3      | OR2D3      |
| HSF2      | C11orf95  | TMED2    | APOB       | KCNN3      |
| SPATA7    | NDEL1     | TUBB6    | STEAP4     | BAI1       |
| GRTP1     | FAM129B   | ATXN1L   | C16orf89   | RPGRIP1    |
| SLC47A2   | VBP1      | ATG7     | SLC13A4    | NEUROG3    |
| AGL       | TGIF2LY   | ZSCAN2   | ADCY4      | PROP1      |
| COA5      | RRAS2     | ANKRD62  | LIG4       | RNF157     |
| MAN2B1    | RCOR2     | REXO4    | TTLL6      | CAP1       |
| ZNHIT2    | POLE2     | RIN1     | KCNIP2     | OTX2       |
| EIF5B     | WFDC13    | PPP1R27  | TRIM55     | IGFL2      |
| HSPA4     | FAM25E    | KLHDC7B  | ACSM2B     | CAMK4      |
| SAMHD1    | TCHH      | LRRN1    | C16orf93   | RET        |
| CCDC159   | CALB2     | ARL8B    | WDR69      | UGT3A2     |
| C21orf59  | TGFBI     | DCT      | BTK        | SCG2       |
| ZNF76     | PCDHB15   | PCIF1    | CACNG1     | DAO        |
| PEX11G    | HBQ1      | TGIF2LY  | ANKRD18E   | SEMA4D     |
| CCDC30    | HCCS      | CYTH2    | FUZ        | C2orf83    |
| INTS10    | C20orf141 | AQP11    | SAP25      | C7orf58    |
| EXD3      | METTL21I  | TGIF2LX  | UGT1A8     | USH1C      |



|          |          |          |           |            |
|----------|----------|----------|-----------|------------|
| VPS33B   | PBX3     | ZBTB12   | SCTR      | PTPN7      |
| DZIP3    | OR2B6    | METTL10  | OR52I1    | CACNG2     |
| TRIM45   | ZFR2     | NUDT21   | ANKFN1    | CACNG2     |
| COG4     | PLP2     | POLD2    | PAMR1     | OR2L2      |
| LMX1A    | STK35    | C3orf67  | ANKRD24   | MYH8       |
| CCKBR    | EBF3     | PGAM2    | CLEC4G    | CACNG3     |
| TUBGCP6  | TRIB3    | WDR74    | KRTCAP2   | RLF        |
| NEIL1    | C3orf72  | MRPS30   | KNG1      | MMP3       |
| CD320    | ADAMTSL  | HNRNPC   | C19orf69  | CALY       |
| IFIT3    | CCDC117  | PPP1R14  | COL28A1   | DDX25      |
| ASNS     | GIP      | GINS3    | RASGRF1   | KLK14      |
| PCYOX1L  | KLHDC7B  | EIF2S3   | RPS6KA1   | WISP1      |
| MERTK    | SPANXC   | TMEM12   | CDHR4     | RDH12      |
| ZNF20    | UBFD1    | POLE2    | RAD9A     | CLEC6A     |
| CAPN9    | ITPRIP   | HHIPL1   | FAM184A   | ASCL1      |
| ZNF446   | MBD5     | ERF      | CCDC135   | WNT8B      |
| LCMT1    | XRN2     | TNFRSF1  | KRTAP5-8  | LMX1B      |
| C10orf81 | NIP7     | AGFG1    | MED31     | TOX3       |
| FASTK    | NCAN     | TBC1D22  | EXOSC8    | TAAR1      |
| TEX9     | RFT1     | TEX13B   | GAMT      | ZCCHC5     |
| SSX2     | HES7     | CILP2    | RP11-1286 | GFI1       |
| ETFB     | C9orf21  | MMACHC   | ANKK1     | CNGA3      |
| CCDC106  | IFNE     | PTPLA    | OR52H1    | CTPS       |
| ENDOD1   | SBNO1    | SCAI     | FGG       | WBP4       |
| TCTN1    | LECT2    | EIF5A    | LEAP2     | HS6ST3     |
| GPR111   | LY6G6F   | SLC25A1  | PAEP      | TESC       |
| PDZD7    | SLC22A24 | GJD4     | TCEB3C    | ATP11C     |
| PCSK6    | DEFB103E | CKS2     | NPHS1     | ZBP1       |
| TMEM139  | OR4C12   | PHF15    | SLC6A12   | RNF17      |
| CC2D1A   | PRAMEF7  | CISD1    | CYP4F11   | MEI1       |
| NOMO1    | LACTBL1  | HPS3     | COX4I2    | MPP1       |
| TRAPPC12 | KRTAP6-2 | KCNA7    | PLEKHN1   | BARX1      |
| INTS3    | CABP5    | KIAA1432 | HINT2     | HSD11B1    |
| KIAA1257 | LIM2     | FAM43B   | RP11-467M | NEURL      |
| GRAMD1C  | OR10W1   | APC2     | ERN2      | CELA1      |
| AKD1     | NEU2     | 43355    | IFFO1     | WISP2      |
| FAM81A   | C8orf86  | POLR3G   | ELN       | FAM69B     |
| GPRIN2   | MAGEB18  | WBP2NL   | UBXN10    | CLDN11     |
| HMGCS2   | C5orf52  | C22orf13 | BOLA2B    | AC217771.1 |
| DDX4     | POM121L  | FLII     | ZNF474    | NDST4      |
| RAD52    | PRR23C   | C20orf14 | AQP7      | TNFRSF19   |
| ZNF680   | USP29    | STX5     | ELFN2     | GP9        |
| ZNF43    | OR13C9   | SAMD8    | ANKRD10   | FGF17      |
| SPATA6   | C6orf146 | PTPN23   | FAM5C     | LYZ        |
| THYN1    | PRAMEF8  | TTL      | LRRC23    | SEC11C     |
| PIR      | KRTAP11- | C9orf50  | WDR63     | TSHR       |
| C9orf43  | OR2T10   | ZNF367   | DHRS9     | CCL25      |
| DDX53    | FAM71B   | DCBLD2   | NLRC4     | NPC1L1     |
| CENPT    | OR1D2    | PRICKLE1 | MOBP      | DNAJC6     |
| WDPCP    | EXOC4    | CYC1     | DUSP13    | CACNG5     |

|            |          |          |           |          |
|------------|----------|----------|-----------|----------|
| PSMB8      | EXOC4    | SLIRP    | STARD10   | F5       |
| TGM5       | PFN3     | HN1L     | EIF4EBP3  | RAB39B   |
| WFDC2      | OR10A3   | TRIML2   | ENO4      | IRG1     |
| C22orf43   | OR12D3   | CCDC71   | AMN       | USP17L1P |
| RPL5       | TMEM95   | VT11A    | TPPP3     | TMEM150B |
| USP17.1    | IQCF5    | CDK2AP1  | LIPT1     | FCRL5    |
| CCDC74B    | ACPT     | RGS20    | HSD17B2   | GPR25    |
| ATXN7L2    | C20orf62 | POLR2E   | BTG4      | KCNK10   |
| KCNMB3     | OR2A2    | SLC8A2   | CCDC39    | ARC      |
| NOS3       | PRAMEF2  | TMEM111  | GPR20     | DCC      |
| ROPN1B     | DEFB136  | GAPDH    | ZNF540    | FAR2     |
| TRIM17     | BLID     | SLC35F3  | AZU1      | PLA2G2D  |
| RP11-1396C | DEFB103A | C19orf26 | MS4A8B    | SEZ6     |
| ANKMY1     | DEFB115  | OR11H1   | ADPRHL1   | CD247    |
| ZNF182     | TRIM42   | TCHH     | PARD6B    | RETNLB   |
| UNC79      | MBD3L5   | PRR24    | OSGIN1    | WNT2     |
| PSMG3      | MBD3L2   | CHRM4    | KCNJ16    | SSTR5    |
| CCDC24     | MBD3L3   | UBE2U    | C1orf88   | SLC6A17  |
| DOC2A      | MBD3L4   | CPNE7    | SGCA      | MT1G     |
| DOC2A      | PTTG2    | CPT1C    | PIBF1     | NAIP     |
| ZNF493     | C11orf91 | ANKLE1   | RP1-286D  | CHST12   |
| LCN12      | C1QL1    | ZDHHC5   | CCDC151   | LRFN2    |
| POM121L7   | IKBIP    | PSG5     | C11orf61  | RTL1     |
| DPCD       | NPB      | OVCH2    | IL18      | MT1H     |
| ZNF518A    | SPANXD   | SGOL1    | KBTBD10   | SCGN     |
| CASQ1      | DFFA     | SMC2     | ZFP3      | MB       |
| SLC3A1     | CSRP3    | FOSL1    | KISS1     | MB       |
| AP1G2      | RPP40    | ATXN2    | ICAM5     | KCNA3    |
| DEPTOR     | ATP5S    | SPANXC   | CA11      | RGS7     |
| HERC6      | SEMA5B   | SLBP     | DNASE2B   | GABRB2   |
| TREX1      | NOC4L    | ADM      | RP11-128E | SBK2     |
| CRIP1      | PROCR    | CPEB1    | DSCAML1   | RNF186   |
| KRT18      | HSPB6    | CLDND2   | ARHGEF15  | COG6     |
| PPIB       | KIF1C    | FAM194A  | AVP       | C11orf44 |
| NUDT14     | COX6A1   | PPARD    | MYT1L     | ZNF813   |
| TSPAN8     | OLFML2A  | HYAL2    | ABHD1     | FAM55D   |
| CCDC146    | HSPB2-C1 | ZNF660   | LRRC49    | DPYSL5   |
| MDGA1      | C7orf29  | SMARCC1  | SUN3      | TMEM196  |
| NBAS       | NUP155   | CPNE8    | ZDHHC11   | FAM178B  |
| FBXO16     | HS3ST3A1 | NSFL1C   | NOTCH4    | DNAH17   |
| BIRC6      | BTF3     | ADD2     | NAPSA     | NOL4     |
| KIAA1009   | ZBTB2    | TMEM38   | TNFRSF4   | FGF16    |
| EIF3CL     | PCBP2    | VMP1     | C1orf162  | SFRP1    |
| FAM50B     | ZNF217   | COL11A2  | LGALS12   | ZNF560   |
| SLC25A27   | CCBE1    | ANO10    | PP2D1     | KCNH6    |
| CCDC82     | THOC7    | BRS3     | EEF1A2    | KPRP     |
| ZNF165     | ANKRD60  | IQCF1    | ATP2C2    | MCF2L    |
| EIF3I      | OR2B2    | RAB32    | ZMYND17   | HTR1A    |
| SYT3       | 12-Sep   | HRH1     | SYNE1     | KRT40    |
| BAI2       | C16orf72 | IFNE     | CHRND     | SALL3    |

|            |          |          |          |           |
|------------|----------|----------|----------|-----------|
| FANCL      | TRIM35   | ZNF880   | CCDC87   | TEX14     |
| PCYT2      | GRIK4    | CCIN     | TREML1   | C1orf95   |
| CWH43      | ARSK     | SLC35G6  | NAPRT1   | NCAM1     |
| CCP110     | IL28B    | MEX3D    | GNPTG    | NRCAM     |
| MZT2A      | CGB5     | MMP16    | PRB2     | HIST2H2AB |
| ZNF266     | C3orf14  | CCDC85B  | CCDC48   | KLHL33    |
| SH3YL1     | CHRD1    | NLRP10   | SCUBE1   | ZDHHC22   |
| RP11-1396C | PXMP2    | SNAI1    | SCUBE1   | ANKS4B    |
| EPM2A      | C5orf51  | SEMA5B   | C12orf69 | FCGR2B    |
| RPL3       | ACCN2    | ZNF334   | FAM183A  | C4orf49   |
| PARP14     | TMEM38E  | MKNK2    | ZNF321P  | SYT13     |
| AC104809.3 | FAM25A   | CHRN1    | NPFF     | LRRC7     |
| CCDC74A    | KLHL4    | HAPLN1   | LRRN4    | PAX4      |
| ACY3       | PLOD2    | THAP4    | CXorf23  | PCSK1N    |
| ENOSF1     | LAMP1    | C3orf72  | GLB1L3   | MEP1B     |
| CDH6       | UBE2V1   | AZI2     | SPEF1    | TAL2      |
| GSTM2      | MTCH2    | OR1F1    | SH2D3C   | DSCAM     |
| KIAA1683   | CDH24    | HBQ1     | GBP2     | MRGPRG    |
| ZNF784     | S100A3   | HES3     | CHP2.1   | TFAP2D    |
| SOD1       | GJC2     | PARS2    | C19orf76 | RPS26     |
| PPP1R7     | HDAC11   | IP6K1    | NOVA2    | DLL3      |
| DKKL1      | VMA21    | CT62     | NUDT5    | PRUNE2    |
| C19orf45   | KCNB1    | SH2D5    | TECR     | HFM1      |
| CYBA       | GAL3ST2  | DLGAP3   | MYOZ2    | LCN8      |
| C22orf32   | RP11-613 | MMP14    | C16orf48 | CADPS     |
| FRMPD2     | ADAMTS6  | HPRT1    | NUBP1    | ANKRD30BL |
| POLL       | CAMKV    | HRK      | CHODL    | CPE       |
| MPHOSPH1   | ZNF599   | LYRM7    | C19orf51 | KCNC2     |
| ENGASE     | CBWD5    | ST3GAL1  | OR52K2   | GZMM      |
| PPP1R16A   | TEX13B   | ACOT6    | XAF1     | OR10A4    |
| NRG4       | CCDC73   | TTC34    | RP1      | ASXL3     |
| ARHGAP8    | OR2S2    | GPR143   | PLG      | TMEM74    |
| PHKG2      | HIF1A    | PCDHGA5  | MACROD1  | CNTN4     |
| TTC26      | HIF1A    | PEX13    | INO80E   | DCLK2     |
| CCDC89     | PI4K2A   | CEP55    | BAIAP3   | RCBTB1    |
| C9orf173   | MRPL37   | NDRG1    | ALDH3A1  | PLSCR5    |
| PARP10     | C9orf47  | ZNF717   | HPCAL4   | OIT3      |
| CRELD1     | PNLIP    | CNTLN    | NACA2    | POU4F2    |
| RP11-1396C | WDR5     | DDX56    | KLHDC1   | ANK2      |
| ZNF23      | UBQLN1   | ZNF605   | RBM26    | IL17D     |
| CR1L       | FAM126A  | L1CAM    | SCN1B    | PBOV1     |
| IDE        | PCF11    | CGB7     | FAM178A  | SLC8A3    |
| BBS4       | GLT25D1  | SNAP29   | EPDR1    | BRSK2     |
| RP11-1396C | CGB7     | SPANXB2  | AMT      | LDHAL6B   |
| PCCA       | PTPRR    | PDYN     | C7orf23  | PPFIA2    |
| CARD14     | TGFB1    | GIP      | ABCC3    | NKAIN2    |
| UGDH       | FAM19A2  | LDHA     | C1orf170 | TAS1R3    |
| AC002365.3 | TRIM59   | FKBP5    | PGC      | CNKS3R3   |
| HGFAC      | HSPB2.1  | HIST1H3J | LACTB2   | PDX1      |
| FAHD2B     | PLIN2    | UBL5     | PPYR1    | RNF215    |

|            |           |          |           |          |
|------------|-----------|----------|-----------|----------|
| IQCG       | MT1E      | MRPL4    | ACOXL     | NKX1-1   |
| ACADVL     | DDTL      | EME2     | MYCBPAP   | OR4C3    |
| PDE4DIP    | SF3A1     | PTPN12   | RPL13     | FAM57B   |
| RNF208     | TMEM64    | LETM2    | HSD11B1L  | NRXN3    |
| STXBP3     | ZCCHC8    | OR2B2    | RP4-811H  | SKOR1    |
| FAM86B1    | HIST1H2A  | CGB1     | FPGT-TNN  | SLC24A3  |
| HRC        | CNTFR     | TRPC1    | FLYWCH1   | ABAT     |
| STRC       | VGLL2     | NPM1     | TMEM80    | SCRT2    |
| FXYD4      | SPANXA1   | C2orf16  | ABCB11    | ANXA10   |
| PIP        | TWIST2    | RPH3A    | CYP2C8    | NPPA     |
| ZNF32      | FAM92A1   | DCAF10   | SAA1      | HOXB4    |
| ZNF451     | C9orf5    | LRR61    | AC008073  | GABRB1   |
| CACNA1F    | PLEKHM2   | SF3B2    | GPR112    | C6orf174 |
| NAE1       | CHN1      | UBP1     | HLA-A     | KCNH8    |
| MRPS5      | ANXA5     | HPD      | TSPO2     | KLK12    |
| RARS2      | SPANXA2   | C13orf16 | TRPM4     | FNDC7    |
| PCYT1B     | PTRF      | DCUN1D5  | SPATA17   | ZNF81    |
| CLEC18A    | C10orf122 | DKK1     | ALS2CL    | TRAPPC9  |
| ARSD       | LLGL1     | STC1     | NDUFV2    | FBLL1    |
| SLC23A1    | VAT1      | BRIX1    | FAM180B   | KCNA1    |
| SDR39U1    | YY1       | MTPN     | DDX26B    | HOXD9    |
| ADCK3      | ZFAND3    | CDC20    | LRR10B    | MAPRE2   |
| FYCO1      | CUL4B     | UBE2S    | NR1H4     | VSTM2A   |
| C16orf55   | OSMR      | SLC22A24 | CLEC3B    | SCG3     |
| C3orf19    | MT1A      | LY6G6F   | WWC3      | GNAZ     |
| WDR54      | TMEM24C   | DEFB103I | AC091172  | SIX2     |
| CROCC      | CAPN7     | MBD3L3   | EGFL7     | CER1     |
| ANKRD54    | PANK2     | MBD3L4   | HLA-B     | NKX2-5   |
| CRYM       | SCAMP1    | MBD3L2   | FBXL8     | FAM169B  |
| CCDC160    | CPA4      | MBD3L5   | HLA-DOB   | PPP1R3B  |
| RP11-1396C | COL6A2    | LACTBL1  | ANKRD18A  | COL25A1  |
| GLB1L      | FGF2      | C5orf52  | TRIM39-RF | CDH7     |
| PHKB       | C17orf74  | OR10A3   | CSMD1     | MIPOL1   |
| DEF6       | YES1      | OR12D3   | ADAT2     | MIPOL1   |
| TRIM62     | SNX21     | CABP5    | C1orf177  | BRMS1L   |
| DYNC2L11   | C5orf43   | LIM2     | RHCE      | TBL1X    |
| WDR31      | RP4-576H  | KRTAP11  | IFT140    | SNCAIP   |
| ZNF273     | SLC5A3    | OR4C12   | AK7       | RHOXF2B  |
| BTN3A1     | PHF13     | KRTAP6-2 | ALB       | OSBPL3   |
| NBPF1      | ME2       | OR10W1   | NPDC1     | LRR2     |
| PPP1R21    | OR1F1     | NEU2     | AGRP      | BRCA2    |
| ZNF177     | IZUMO4    | PRR23C   | HAGHL     | ENC1     |
| TMEM238    | MCFD2     | OR2T10   | PNPLA4    | ZNF519   |
| ASPG       | CAV1      | FAM71B   | ERCC5     | TOX      |
| CCDC104    | SMCR8     | EXOC4    | TSPAN32   | TRIM67   |
| MUTYH      | PRKAR1B   | EXOC4    | TDRD3     | KCNC1    |
| ATRNL1     | MAMSTR    | TMEM95   | REEP6     | MTNR1A   |
| AHCYL1     | GFRA1     | DEFB115  | CAPN12    | GALNTL5  |
| SELENBP1   | CRKL      | PRAMEF7  | SPATA18   | SOX14    |
| RBM20      | CADM3     | C8orf86  | AGTRAP    | ATP7B    |

|            |          |          |           |                 |
|------------|----------|----------|-----------|-----------------|
| RNF123     | AHNAK2   | MAGEB1   | NFE2      | TFF3            |
| PSMB10     | SP9      | POM121L  | AKR7A2    | KCNB2           |
| AC002310   | RBM22    | USP29    | VIP       | BFSP2           |
| C14orf2    | RRP9     | OR13C9   | TRAF5     | DCLK1           |
| AKR1B1     | NXN      | PRAMEF8  | JMJD5     | RP11-404P21.8.1 |
| PLD3       | MT2A     | PFN3     | ADAMTS8   | CNR1            |
| RWDD2B     | SNAP29   | ACPT     | SLC4A2    | SLC17A4         |
| FAM198A    | SOX30    | PRAMEF2  | RP11-468E | CEP128          |
| TMEM72     | STK10    | DEFB136  | PFN4      | CPA5            |
| C16orf86   | BAIAP2L2 | BLID     | DHRS2     | USP17L8         |
| RP11-7230  | FAM180A  | IQCF5    | IL5RA     | GRAP2           |
| NOXA1      | C7orf45  | OR2A2    | ALKBH8    | NYAP1           |
| COG7       | CGB1     | TRIM42   | BOLA2     | RUNDC3A         |
| COG7       | TM4SF19  | C6orf146 | SPACA3    | FBXW7           |
| TUBB1      | LETM2    | OR1D2    | ZNF254    | KLK11           |
| WDR73      | EFCAB9   | C20orf62 | AMBP      | CARKD           |
| POLG       | DENND5B  | DEFB103  | VNN3      | SLC25A31        |
| CBWD7      | CGB      | LECT2    | C1orf222  | REPS2           |
| PAAF1      | LSM12    | PTTG2    | ECM1      | ABRA            |
| ICA1L      | DHX37    | IZUMO4   | SUSD4     | NAPB            |
| PCM1       | EHD1     | ITPR1    | C19orf66  | PTMS            |
| IFIT2      | OTP      | EIF2C2   | EFCAB6    | SEBOX           |
| EPHA4      | KHDC1L   | SAR1A    | OCEL1     | MYT1            |
| TNIK       | SOX12    | CSNK2A1  | APBA1     | MAPK8IP1        |
| TTC23      | LSM6     | HIST2H3C | TLE6      | IZUMO2          |
| AIFM1      | ARL10    | SLC38A2  | C17orf47  | RNF148          |
| RHOBTB1    | PGAM2    | EIF3G    | IL29      | PPM1E           |
| NDUFV3     | SMAP1    | PRDM4    | CCDC81    | CLVS1           |
| GSTM3      | CNTLN    | S100A2   | YSK4      | PRR20B          |
| ALPP       | C4orf46  | RBM42    | RP11-268F | PRR20A          |
| KLC4       | NDRG1    | SMCR8    | RPL28     | USP17L3         |
| WDR19      | OTOP1    | CBS      | AP000322  | CRYBA2          |
| CCNT2      | SPOCK1   | LOX      | TMED6     | TUSC3           |
| BRE        | TMEM38   | SPANXD   | GNMT      | FAM194B         |
| FAM195A    | HIST1H2B | OR2S2    | FATE1     | CDH9            |
| ARRDC1     | FBN2     | SOX30    | TECTA     | FCGR3B          |
| SAMD10     | UBE2R2   | PTPRR    | APOBEC2   | C6orf94         |
| RP11-762I7 | EIF5A    | HYAL3    | ROPN1L    | ZMAT4           |
| SLC35F4    | TCEA1    | GDNF     | TYK2      | SRRM4           |
| KY         | SMN2     | C1QL1    | SUGT1     | CTD-2135J3.4.1  |
| CCNA1      | F7       | FOXP1    | TSKS      | FRMD1           |
| MUC6       | KIAA1432 | MT1E     | GPBAR1    | EPHA7           |
| ZNF44      | PRRC2B   | ZNF295   | ACCS      | MAGEH1          |
| CCDC28B    | C9orf50  | BCL7B    | MAPK15    | C1orf127        |
| TTC30B     | ARHGAP2  | SLC27A4  | KIF12     | CD163           |
| CIB1       | RP11-585 | KIAA1143 | ITGA1     | FOXG1           |
| SLC40A1    | GSC2     | PCDHGA6  | ABCA6     | KRTAP1-1        |
| PAM        | S100A4   | HSD17B3  | SDPR      | NPSR1           |
| TK2        | MBOAT7   | PA2G4    | CAMK1D    | CNTNAP2         |
| TK2        | HSBP1L1  | PHOX2A   | GSTA3     | CCDC155         |

|            |          |           |          |          |
|------------|----------|-----------|----------|----------|
| ENPP5      | EIF3M    | TRIO      | OR5AU1   | GSC      |
| CEP152     | PTTG1    | HES7      | FAM188A  | CHRN2    |
| ZKSCAN2    | CD44     | ANXA2     | HHATL    | PM20D1   |
| SERPINA3   | POM121L  | TAF3      | AGAP5    | KRTAP4-5 |
| ZNF692     | LRRC8A   | BAIAP2L2  | RLN3     | SLC17A1  |
| KRT23      | FLNC     | NKPD1     | ECSCR    | CAMK2B   |
| CCDC76     | PDE12    | ZNF782    | ECSCR    | CSNK1A1L |
| FAM107A    | ATP2B1   | HIST1H1C  | TPP2     | IGFBP2   |
| SLC28A2    | GOLGA3   | SPRED3    | PLA2G1B  | GPR37L1  |
| FNDC5      | FAM36A   | NPB       | TAF1D    | ACTL6B   |
| DHX57      | SNAPC2   | MRPS18B   | SPERT    | KCNJ11   |
| RBM1D      | DVL2     | TMEFF1    | C11orf21 | FGB      |
| ACAT1      | ZNF699   | ZNF479    | NEGR1    | INSRR    |
| GRM5       | SPON2    | ODZ2      | C6orf52  | CDX2     |
| AC006547.1 | PSG3     | PNPLA6    | SMPDL3B  | GLYATL3  |
| ZNF222     | UCK1     | EID2      | SSBP4    | MGAT5B   |
| PGR        | HHIPL1   | PKN3      | SULT2B1  | PLCZ1    |
| BMP1B      | C18orf54 | SLC39A4   | LUZP2    | ZNF215   |
| N6AMT1     | LARP1    | FOXL2     | GPR116   | BEST3    |
| SYCE1L     | CLIP2    | C4orf3    | SH2B1    | SDK1     |
| TSTD1      | ATP6V0A2 | VPS29     | SLC9A5   | CLDN20   |
| ATR        | MEX3C    | BUB3      | GPR108   | THEG     |
| CCDC40     | TRIAP1   | ZNF621    | T        | MAGEC3   |
| CNPY3      | DNAJB12  | FUT5      | RHOD     | SLFN11   |
| COMMD1     | PPP2R5D  | KLHL4     | FHAD1    |          |
| GOLGA1     | DFNA5    | CBL       | MYH11    |          |
| PGPEP1L    | C3orf26  | UBAP2     | LMF1     |          |
| PITRM1     | ST5      | POLR3F    | ANKDD1B  |          |
| LIPT2      | HAUS2    | MRPL43    | SPTA1    |          |
| RWDD3      | PLCD3    | TNNT1     | TSSK3    |          |
| TKTL1      | APCDD1L  | E2F4      | KIAA0391 |          |
| PYROXD1    | LGALS1   | PES1      | IL37     |          |
| RP11-407N  | CCIN     | ZNF724P   | FGA      |          |
| FGGY       | UBE2F    | TBC1D20   | CKB      |          |
| NEUROG1    | CCNA2    | PRAF2     | CNGA4    |          |
| MSX1       | RIN1     | LDLRAD3   | CCDC84   |          |
| FUK        | SCAP     | S100A4    | DNAJB13  |          |
| PKHD1L1    | ZNF782   | GPR107    | ZNF573   |          |
| CYP1A2     | ARHGAP2  | COQ5      | ZNHIT1   |          |
| ZNF705D    | PRSS3    | STX1B     | CCDC68   |          |
| MSX2       | DDT      | C17orf39  | DNAH1    |          |
| ZNF280D    | HAPLN4   | PIAS4     | TDRD10   |          |
| INTS4      | TTL      | FOPNL     | RETN     |          |
| RTKN       | TIMM22   | TBC1D25   | HLA-DQA1 |          |
| NEFH       | SLC8A2   | CALB2     | DYDC2    |          |
| ZNF705G    | GNG10    | BRK1      | TMEM52   |          |
| C1QTNF8    | FPGS     | HSD17B1   | C2orf62  |          |
| ADAP1      | TLX2     | POLE3     | LIAS     |          |
| SERPINA6   | NAA20    | AC01346.1 | TMEM219  |          |
| ZNF816     | REXO4    | C11orf20  | ATG16L2  |          |

|           |          |          |                 |
|-----------|----------|----------|-----------------|
| GRIK1     | CDK19    | C19orf29 | CHKB            |
| UFC1      | GJD4     | CLIC1    | CCDC147         |
| GMNC      | TMEM203  | USP19    | AGPAT9          |
| RGR       | TFDP1    | PRSS3    | NEDD9           |
| ABCA7     | APC2     | BCL2L2-P | RP11-368J21.2.1 |
| SCGB1D4   | CIC      | FAM72A   | GPR61           |
| PLIN1     | NSA2     | DDX21    | FBXL16          |
| INSL6     | FKBP1A   | SPTLC1   | MYOCD           |
| SCGB2A2   | SGCB     | COL6A1   | TSPAN1          |
| PDILT     | SLC4A1   | SHISA5   | RGS14           |
| CT45A4    | SLC35A4  | FAM127C  | NSUN6           |
| OLFM4     | SNTA1    | RPA3     | AKR1B10         |
| TRH       | CTH      | C10orf14 | C5orf20         |
| GALP      | C9orf89  | LHX6     | CLCNKB          |
| FOXB2     | DAZAP1   | DEK      | IGSF22          |
| ARGFX     | BTBD19   | ADAMTS1  | ERAP2           |
| PRAMEF14  | FGFR1    | CCNA2    | ALDOB           |
| LY6G6E    | NECAB1   | CGB      | PTP4A3          |
| KRTAP10-8 | SIGMAR1  | AXL      | LY6G5C          |
| F9        | NCKIPSD  | KIAA1715 | C1orf116        |
| SLC26A3   | USP22    | SLC7A10  | ABHD14A         |
| CFHR5     | PCDHGC5  | PRR16    | UBAP1L          |
| MOS       | KLHDC10  | YBX1     | PLCG2           |
| OR8B12    | PSMF1    | SAMD4B   | RP11-73M18.2.1  |
| GPR101    | MZT1     | CLCN1    | RP11-82O18.1.1  |
| OR1C1     | NUP35    | S100A11  | CRYZL1          |
| CXorf66   | CALU     | SUGP1    | CETN2           |
| OR8B3     | SNRPB    | RPSAP58  | TMEM31          |
| RP11-166N | XKR3     | MAF1     | IZUMO1          |
| OR5AP2    | TNNT1    | MXI1     | GNGT2           |
| INSL5     | VPS13A   | NDUFS6   | HMCN2           |
| SPINLW1-W | EID2B    | A3GALT2  | HMCN2           |
| OR12D2    | AP2A1    | CBLL1    | HMCN2           |
| OR51D1    | NADKD1   | FSCN1    | HMCN2           |
| PRSS38    | DRAP1    | FRMD8    | LYPLAL1         |
| KRTAP10-6 | C10orf47 | TLX2     | CRYBA4          |
| CT47A9    | PTBP3    | LPAR2    | SPEF2           |
| CT47A8    | ANO6     | UBQLN1   | KNDC1           |
| C10orf27  | PTX4     | CAMK2N   | IDI2            |
| CRYGB     | CACNB4   | CSNK2B   | TNFRSF6B        |
| OR6F1     | IPO7     | NMD3     | ATG9B           |
| RBPJL     | HIST1H4H | DPM1     | LRIT3           |
| GPHB5     | METTL2B  | C9orf30  | HPN             |
| LCN9      | SPRED3   | ASPH     | C4orf33         |
| ATP1B4    | PAIP1    | RHOF     | TGM3            |
| CLRN1     | FTSJ1    | KLF11    | NQO1            |
| OR14K1    | RP11-566 | DIXDC1   | CNTF            |
| CRNN      | CSNK2B   | IRAK1    | LRRC29          |
| OR8A1     | TFAM     | HIATL1   | NINJ2           |
| KRTAP10-1 | SNRPB2   | KLF10    | C17orf46        |

|            |          |                 |                 |
|------------|----------|-----------------|-----------------|
| SCNN1B     | NDUFB6   | KCTD11          | THSD1           |
| SCNN1B     | GFPT2    | NAB2            | CLIP4           |
| CT47A11    | CRAT     | ABHD6           | C6orf97         |
| OR13G1     | CSTF3    | CDH24           | GGN             |
| CLDN17     | MXI1     | HSPB6           | FAM189A2        |
| GNAT3      | SNAI1    | CIC             | ZDHHC11B        |
| OR4D5      | IER5L    | CEP72           | CSF2            |
| OR10D3     | MAPK1    | HIST1H2EFAM82A1 |                 |
| MS4A13     | NTN5     | CSNK1G3         | RPL17           |
| SLC22A6    | GDF1     | WNT7A           | C2orf40         |
| RP11-108L7 | VPS8     | TMEM14I         | IL31RA          |
| OR1E2      | RASSF8   | PAX6            | AC022098.1      |
| KRTAP10-1  | KPNA6    | SNRPC           | PTCH2           |
| SEMG2      | NRIP3    | C10orf11        | DNAJC28         |
| DUXA       | TPGS2    | GJC2            | ZMAT5           |
| OR8D1      | UBE2C    | ZNF664          | MUSTN1          |
| CT47B1     | GPR176   | C13orf27        | TPPP2           |
| FGF3       | MTHFD1L  | INVS            | SAA4            |
| DPRX       | CPNE7    | PCDHGB6         | ACBD4           |
| TPD52L3    | TTC33    | PLOD1           | GP6             |
| SLC15A5    | C7orf60  | TAB1            | SEPX1           |
| KRT25      | FJX1     | ANO6            | LMO1            |
| OR52A5     | HEPACAM  | UCK1            | SYCE3           |
| OR51J1     | UBP1     | MT1M            | COX5B           |
| OR6V1      | C4orf51  | ARHGAP2         | ATPIF1          |
| RFPL4B     | RASGEF1C | LRRTM1          | IL3RA           |
| NPVF       | TCEB3B   | CLIC4           | ARSE            |
| NANOS2     | SOCS2    | CALU            | ARV1            |
| KRTAP10-4  | TMEM42   | HABP4           | CTB-134H23.1.1  |
| HTR5A      | MAF1     | THOC7           | C1orf201        |
| CRYGC      | TAF9B    | ZBTB11          | DHRS12          |
| C10orf53   | SPHK1    | RCL1            | GLI1            |
| RBMY1F     | PSG2     | SLC15A4         | EFHC2           |
| MYOG       | BUB3     | NUP35           | DNAH7           |
| KLK15      | ATP5G3   | ALG3            | TMEM125         |
| ACTL7A     | TAX1BP3  | ASPHD1          | TBX2            |
| TYR        | NEURL2   | KHDRBS1         | ADM2            |
| BLACE      | ZDHHC8   | PROM2           | CDKL3           |
| RP13-221M  | TMEFF2   | ZBTB38          | SYF2            |
| HIST3H3    | SFSWAP   | SEMA3F          | TPCN1           |
| RBMY1A1    | ZNF596   | SPANXA1         | ALDH2           |
| ZNF862     | MKNK2    | STK32C          | PTPRU           |
| ATP2B2     | APOPT1   | C3orf78         | LRRC19          |
| SOX17      | TMEM14E  | CHCHD3          | HSF4            |
| CEACAM16   | SENP3    | CENPH           | SFTA2           |
| CDC20B     | QPCTL    | SFXN5           | C3orf71         |
| UBR2       | CLNS1A   | SPON2           | RP11-403P17.5.1 |
| SCGB1D2    | ZFP1     | OSMR            | ZNF181          |
| AC226150.1 | WASF1    | SPANXA2         | CASC1           |
| GALNTL1    | ZFAND1   | COX6A1          | C1orf192        |



|            |          |          |          |
|------------|----------|----------|----------|
| SHROOM1    | IFITM3   | RP11-566 | CPO      |
| FMO4       | YIPF5    | CBWD5    | C17orf72 |
| MLXIPL     | SH3GL1   | THOC5    | CASP4    |
| FOXRED1    | ZNF578   | PPP4R2   | ZNF34    |
| GRIA2      | ZNF85    | SLC2A1   | TMEM163  |
| SLURP1     | PRAMEF1  | PTX4     | DCST1    |
| PNISR      | MMGT1    | HEPN1    | GPX4     |
| ZNF514     | BRAF     | VEGFC    | FXYD5    |
| FGF23      | TWF1     | ANKRD60  | CYP3A5   |
| ESR1       | KDSR     | KLF7     | P4HTM    |
| SCGB2A1    | SH3D21   | ASB1     | PRDX5    |
| TCEA2      | PAWR     | DCTPP1   | GRIN2D   |
| PARD6A     | CAPNS1   | GRPEL1   | EFCAB10  |
| MYH7B      | TBC1D5   | EIF1AD   | MATK     |
| PBX1       | DEPDC5   | GDF6     | RIBC1    |
| PBX1       | NTN3     | HTRA1    | ZBTB32   |
| ZNF823     | HIST1H1C | ARHGAP3  | NENF     |
| LAMA1      | PPTC7    | GRM2     | DLEC1    |
| SON        | FAM70B   | SYT6     | DENND2D  |
| PCDHA6     | DENND2A  | RELA     | BPIFB2   |
| TXLNG      | XKR6     | ARMC10   | FAH      |
| DNALI1     | NUDT6    | TTC28    | SEMA4G   |
| SEMA3E     | NR1D2    | APOA2    | CORO6    |
| 14-Sep     | FAM43B   | KCNB1    | P2RY6    |
| WIF1       | NKPD1    | FADS2    | RASSF4   |
| FREM2      | SGOL1    | TRIM71   | PPP1R3E  |
| COL2A1     | SCO1     | TP53TG5  | JAKMIP3  |
| SZT2       | LACTB    | FLNC     | IFT88    |
| HGD        | TBX22    | C20orf24 | C9orf174 |
| TBCK       | DNAJB5   | MIS18A   | MAP1A    |
| TRIM43     | TPM3     | ZNF891   | LMTK3    |
| GSTP1      | PHF23    | C5orf22  | ZDHHC1   |
| MIOS       | RASA3    | BASP1    | COL4A3   |
| CA10       | ARPC4-TT | IFRD1    | ZMYND10  |
| SERPINA5   | CHAT     | RP11-724 | SEC14L4  |
| FABP2      | LHX5     | C4orf51  | ANKRD2   |
| RUFY4      | SUMO3    | DEPDC5   | MSH4     |
| RP11-1286f | CYBRD1   | LRP12    | BCMO1    |
| PAQR5      | FAM168A  | SLC12A8  | RPL18A   |
| ZNF470     | C19orf26 | CAV2     | RPS15    |
| MRPS9      | DNLZ     | FAM72B   | TACR2    |
| LEFTY1     | ART1     | EFCAB9   | GDF15    |
| MIA3       | PPIA     | SPOCK1   | ZNF267   |
| RNPEPL1    | SEC61A2  | TEX10    | GPR162   |
| QARS       | SLC10A4  | SLC2A10  | NUCB2    |
| CDK5       | RPL35A   | TMEM39f  | C2orf74  |
| LRRC56     | AP00035C | VPS13A   | TMEM208  |
| IFIT1      | QSOX2    | RPSA     | LRTOMT   |
| FILIP1     | SLC39A14 | TH       | SORBS1   |
| SLC5A8     | RELA     | ZNF208   | C1orf228 |

|           |           |              |                |
|-----------|-----------|--------------|----------------|
| MAK       | CKS2      | NTN5         | CADM1          |
| CYP4F8    | RP13-672  | S100A3       | IPP            |
| C11orf9   | RBMS3     | ZNF718       | ANKRD22        |
| GTF3C6    | DGAT2L6   | CTC-534A     | LRG1           |
| PDCL2     | NUFIP1    | CHAF1A       | NPR2           |
| KCNN1     | VMP1      | MAPK7        | C21orf2        |
| PPOX      | COMMD5    | CRYAB        | CYP2A13        |
| HSPH1     | RAB11FIP1 | ZNF736       | DDX59          |
| WDR37     | NAT16     | ITGB1BP1     | CDRT4          |
| ZNF700    | MEX3D     | RPL24        | SORCS2         |
| IGLON5    | CCL8      | ZCWPW1       | CD101          |
| MT3       | SPATA2    | NPW          | GSTO2          |
| DIRAS2    | CARM1     | ACTR1A       | CRABP2         |
| MSRB2     | FEZF2     | VBP1         | CCL17          |
| NAA11     | C22orf26  | PPP1R3F      | DVL1           |
| ZNF608    | PAQR7     | UNG          | IGFALS         |
| MZT2B     | CDT1      | TP53RK       | ACTG2          |
| GAL3ST3   | NR2C2     | CTF1         | TGM4           |
| ZNF14     | NLRP10    | NHEJ1        | MYBPC2         |
| ZNF440    | SHISA7    | PCDHB15      | PHF11          |
| CCDC121   | RSPO4     | PCDHGA1      | C6orf118       |
| PEX11A    | METTL5    | VDAC1        | RAPSN          |
| CARD18    | TAB1      | OR1Q1        | PRTN3          |
| FOLH1     | GPR107    | ZRANB3       | RP11-54H19.8.1 |
| ARHGEF9   | FNTA      | BMI1         | TNXB           |
| NUP133    | SLC39A4   | ZNF789       | GSDMD          |
| AMIGO3    | KCNIP3    | RBM7         | GLI4           |
| C20orf201 | NUDT19    | CCDC9        | FSIP1          |
| SYTL4     | DNAJC18   | AKT1S1       | RSPH1          |
| ACE       | NAF1      | ZNF114       | HMHA1          |
| UBXN4     | PPP1R14E  | RNF26        | ZNF429         |
| C19orf46  | ATG12     | CCDC15       | DROSHA         |
| ACAD10    | SLC36A4   | SPRN         | ALS2CR12       |
| RP1L1     | SPATA25   | LRRC3        | TMEM180        |
| TMEM214   | ADORA2B   | GTF2E1       | C12orf63       |
| CTSL2     | TMEM14C   | ZC3HAV1      | ADAMTSL4       |
| CYP2J2    | HES3      | HIST1H2ELTN1 |                |
| WDR60     | TCP11L1   | FAM126A      | KIAA1841       |
| PDXK      | LIN52     | BRAF         | EMB            |
| SAYSD1    | DNAJC25   | PORCN        | IGFN1          |
| SYBU      | TMEM20C   | TSSK2        | HIGD1B         |
| GEMIN8    | C12orf43  | TRIP10       | FBXO2          |
| ZNF571    | PCOLCE    | TFDP2        | EIF3L          |
| COL21A1   | RNF26     | TBC1D2       | PDE4C          |
| SH3BGR    | MAP1B     | BEGAIN       | LGI4           |
| IQCE      | COPZ1     | MRPS35       | AXIN2          |
| RP4-559A3 | KLC3      | DENND2A      | LRGUKE         |
| UBA7      | A3GALT2F  | RAB43        | OBFC1          |
| CTAGE1    | CHRNA1    | SOCS2        | RG9MTD3        |
| NPRL2     | PHF19     | LRFN1        | CELF5          |

|          |          |          |          |
|----------|----------|----------|----------|
| IFI30    | AFAP1    | TSFM     | SMARCD3  |
| WFIKKN1  | SEC14L2  | EHD2     | GPR123   |
| OTOA     | C10orf11 | SLC3A2   | GNG8     |
| ZNF75D   | SLC7A10  | OTOP1    | SLC16A5  |
| ZNF563   | C5orf41  | C8orf82  | TMEM130  |
| FDXR     | ARL13B   | SPRYD7   | MOCS1    |
| PRSS45   | C1orf182 | NDUFAF2  | TST      |
| PCDHB3   | MAVS     | OTUD4    | ZNFX1    |
| FOXN4    | SLCO4A1  | MAPKAP1  | SPA17    |
| SLC24A4  | FLII     | NEURL2   | POLD4    |
| ADD3     | CSTF2T   | TMEM15   | USE1     |
| CAND2    | SLC9A7   | DSCR3    | MRPS15   |
| PPARG    | RAB21    | SEC22A   | SLC6A20  |
| TNMD     | HIGD1C   | TTC33    | RAPGEF3  |
| C1orf64  | RNF167   | CIZ1     | BTN3A2   |
| ACSF3    | MYC      | CCRN4L   | HLA-G    |
| PROC     | SKA1     | RP13-672 | ARHGAP18 |
| COL23A1  | SLC18A3  | TAX1BP3  | FBXO39   |
| GPR26    | ACTN3    | HIST4H4  | CCDC153  |
| DMXL2    | LARP1B   | TSR2     | CCDC96   |
| CACNA2D3 | EIF2C2   | GNAT1    | ITIH1    |
| TF       | C9orf78  | UBE2M    | NPIPL3   |
| RFXANK   | GRK1     | VAT1     | SULT1A1  |
| SLC25A47 | QSER1    | DCAF15   | ADAM33   |
| EFCAB8   | GTF3C4   | GTF2IRD1 | NODAL    |
| EFCAB8   | NDUFA12  | CCT5     | EFCAB1   |
| EFCAB8   | PEX26    | HIST1H4F | C9orf128 |
| SSTR4    | ANO4     | RNF212   | SULT1C2  |
| INTS8    | SLC34A1  | CELSR3   | SPATA24  |
| KIAA1324 | ASPHD1   | SLC5A10  | MRPL54   |
| NAT14    | MAGOH    | CDRT1    | SYNM     |
| GLB1     | EFEMP2   | CLNS1A   | BCAM     |
| MFGE8    | THAP1    | COL6A2   | CAPS     |
| MFGE8    | DDIT4    | CCDC63   | NXF1     |
| C1QL4    | INPP5F   | AC10080  | NME7     |
| AK2      | YARS2    | APCDD1L  | LHCGR    |
| THEM4    | VDAC2    | CCDC86   | MAP3K15  |
| AC108938 | HMGA2    | BEND6    | CLEC1A   |
| YPEL4    | ZEB1     | ARIH2    | DHRS7B   |
| CPSF3    | HECW1    | PYGL     | TMEM133  |
| ZNF525   | RFX8     | GSS      | CLDN5    |
| PCDHB1   | NUDCD2   | WSB2     | NHS      |
| ZNF606   | CLMP     | RAN      | BAIAP2   |
| C2orf70  | TP53     | HIST1H4J | RADIL    |
| C12orf74 | ZYX      | SEC23A   | C9orf103 |
| LRRC17   | ZBTB12   | MT1X     | CES4A    |
| ADAMTS9  | MAG      | MRPS17   | FAM71D   |
| BLZF1    | SCARB1   | RYBP     | KLK5     |
| USP34    | NRM      | HNRNPR   | RSPH4A   |
| CCDC57   | UBAC2    | SHC3     | RGPD5    |

|            |          |          |                 |
|------------|----------|----------|-----------------|
| PDZRN3     | EPN2     | UBE2E1   | HIST1H1T        |
| CHRNA3     | LRRRC58  | MCFD2    | RRAD            |
| PUS3       | STX5     | HIST2H3A | DHDH            |
| KNCN       | FAM122B  | XIRP1    | RORC            |
| RBP2       | DEK      | CSRNP1   | NRL             |
| SMAD6      | RNF222   | KCTD7    | C19orf18        |
| PAX8       | HIST1H2A | CSPG5    | PLA1A           |
| GALT       | ATG7     | GSC2     | TIMP4           |
| CCT8       | CTC-534A | PRPF19   | NAT1            |
| EPOR       | GALNT9   | RNF167   | MPP3            |
| SALL1      | PCDHA13  | SEC13    | OSR1            |
| RBBP6      | CDC14B   | METTL21  | SHROOM4         |
| PLEKHB1    | ARMC10   | MDK      | LGR6            |
| METTL20    | DOCK3    | MED10    | C15orf26        |
| CSTL1      | KIAA1524 | LMNB2    | OXA1L           |
| THUMPD1    | PPP1R18  | CHERP    | UPK3A           |
| APBB3      | SMC2     | KCTD10   | BLVRA           |
| TAC1       | CCDC85B  | ZBTB2    | PDE8A           |
| TTL7       | ZNF717   | TCEA1    | AC109829.1.1    |
| SMPD2      | SLC2A11  | RP11-3N2 | RP11-231C14.4.1 |
| C6orf15    | BET1     | MBD5     | LCA5L           |
| SESN1      | RBM12    | SHISA7   | RNF39           |
| TGM7       | KCNJ14   | SRP72    | KAL1            |
| MCF2       | MDK      | SNRNP40  | ZBTB3           |
| PLDN       | EPM2AIP1 | ANXA5    | RTDR1           |
| RNF40      | GPR152   | DNLZ     | FANK1           |
| CIR1       | ZFAND2A  | DNAJC11  | MDH1B           |
| RABL5      | HIST1H1A | SPRYD4   | SYT15           |
| RXFP4      | ACOT6    | GSG2     | TEKT2           |
| MCCD1      | RNF130   | CCR10    | CPNE2           |
| NUDT17     | ZNF621   | MRPL49   | DYNC2H1         |
| HEATR7A    | RP11-293 | HRSLS    | PLD4            |
| MUT        | CD300LD  | DOCK3    | PBLD            |
| RHBG       | SLC38A5  | C17orf10 | MUC5B           |
| C2orf88    | RCL1     | SENP3    | C1orf158        |
| AKAP8L     | HPCA     | MCM4     | TXNDC17         |
| NAT8       | RECK     | FAM36A   | RP11-190A12.7.1 |
| STX16-NPEI | METTL10  | C5orf51  | SUSD2           |
| CTD-2006C  | CGGBP1   | FANCC    | ZG16B           |
| TCEAL2     | ERCC2    | SMAP1    | PANX3           |
| ACSF2      | OTUD6B   | WFDC13   | UCN             |
| TMEM35     | CYC1     | PAPD7    | LAIR2           |
| ROPN1      | VPS37B   | ANKRD7   | TRMT61B         |
| ZNF841     | C1orf144 | DFNA5    | RPL3L           |
| UQCRC2     | C11orf85 | NAA35    | IFT57           |
| REEP1      | ODC1     | RBM12B   | VSIG10L         |
| CCDC28A    | SHC3     | HSPB2-C1 | CKLF-CMTM1      |
| FAM111A    | BRS3     | BNIP3L   | VCX2            |
| SYT8       | CTSA     | RP11-196 | LONRF3          |
| ASUN       | CCRN4L   | MPHOSPI  | TRADD           |

|            |           |          |               |
|------------|-----------|----------|---------------|
| CALML4     | CORO1C    | SWI5     | PRODH         |
| UGGT1      | CHTF8     | MTX2     | ESYT3         |
| CDRT15     | CLTA      | C18orf54 | TSPYL6        |
| FAM156B    | ANKRD7    | ZNF568   | NUP214        |
| MLNR       | PLEKHG2   | PXK      | PAM16         |
| ANXA9      | LMNB2     | MAFG     | FBXL22        |
| LPIN3      | GTF2F1    | STEAP3   | C9orf93       |
| ZNF678     | UHRF1BP1  | RUVBL1   | MIOX          |
| SERTM1     | C5orf34   | WDR55    | NHLRC4        |
| STX16      | TRIP13    | RBM22    | BDNF          |
| MOGAT1     | FAM46B    | DHFR     | NDUFS8        |
| LRRD1      | SNX15     | CDC37    | THNSL1        |
| POTEF      | CCR10     | QPCTL    | KIF27         |
| RP3-402G1  | NUDCD1    | TAF5     | PUS10         |
| TATDN3     | TATDN1    | PCBP3    | MAPK10        |
| CDC42BPG   | SEMA3F    | SP5      | 43161         |
| ADCK5      | RP11-724A | AP00035C | C22orf23      |
| CLCC1      | CIDEA     | STAU1    | PRR14         |
| PLEKHH1    | ZNF605    | TSR1     | EFHB          |
| NPHP3      | ZDHHC14   | ETF1     | IRX3          |
| DEGS2      | TRIO      | CAV1     | KBTBD3        |
| PRAMEF19   | TBC1D19   | HPCA     | STARD9        |
| SCNN1G     | MCHR1     | DMKN     | FAM22A        |
| RBM34      | SDHB      | KHSRP    | RP5-862P8.2.1 |
| BST2       | TMEM12C   | GIPC3    | ETV7          |
| ARMC5      | ZFP41     | HSD17B1  | FBXO15        |
| SIRT7      | TPST2     | MAGEA8   | C21orf63      |
| ZNF425     | SPIN1     | ATP6V1C  | NLRP1         |
| SMYD2      | LDLRAD3   | C9orf47  | CCDC114       |
| CLDN22     | HSD17B3   | PIAS2    | DOK7          |
| TIGD2      | MFAP5     | RHOA     | CCDC88B       |
| H2BFWT     | C11orf58  | EIF3M    | TTYH1         |
| KIAA1107   | ARF6      | BCL2L1   | RPL18         |
| SLC11A2    | KIRREL    | BIVM     | PBX4          |
| ISG15      | C12orf24  | RP11-613 | UNC93B1       |
| POMGNT1    | CD163L1   | ANO7     | NDST2         |
| MOV10      | TSSK2     | NLGN2    | SYTL2         |
| OSBPL9     | PCDHGA5   | DYNLL1   | SLC16A11      |
| WDR49      | DCTN4     | MELK     | TRIM31        |
| RGSL1      | YAP1      | RPP14    | CATSPERG      |
| COL9A1     | FTMT      | ZBTB9    | RXRG          |
| NBPF3      | C1QBP     | ZNF385D  | FOXL1         |
| C16orf90   | MED10     | RRS1     | SLC6A16       |
| CCDC67     | KIAA1644  | FUBP3    | C8orf46       |
| FAM149B1   | FBXO34    | NUDT11   | C2orf50       |
| EYA2       | FBXO34    | MME      | CACNG4        |
| SETD4      | SCN5A     | WWTR1    | CXorf65       |
| GSTM4      | PRKAA1    | EID2B    | MTMR11        |
| TXNRD2     | TRIP10    | PVR      | ZNF558        |
| RP11-683L2 | RAB3IP    | APOA1    | SPAG6         |

|            |          |          |                  |
|------------|----------|----------|------------------|
| CDK11A     | ERF      | CWF19L1  | PTPN6            |
| UACA       | SGTB     | UBXN1    | ZNF843           |
| KATNAL2    | HSD3B7   | ODC1     | PGCP.1           |
| RP13-221M  | TRIP6    | PTGER1   | ESD              |
| EPRS       | GPR156   | TPM4     | F10              |
| FAIM       | BCL2L13  | ODZ3     | CLDN15           |
| FAM3A      | PDCD5    | GFAP     | FAM22E           |
| HOMER2     | CAMK2N2  | PXMP2    | ZNF720           |
| FHIT       | PRRC1    | PFDN4    | CHRM3            |
| NKTR       | C20orf30 | GNAI2    | MVP              |
| KRTCAP3    | CAST     | PCDHB12  | CERKL            |
| WDTC1      | SRPX     | F7       | BAI3             |
| C2orf67    | KLHL31   | MTDH     | VWCE             |
| SLC19A1    | PITX3    | ZNF598   | FAM167B          |
| CA8        | PAX6     | KCNG2    | PHACTR3          |
| YTHDC2     | SHQ1     | CCDC90A  | CCDC103          |
| HEY1       | IKZF5    | NAT6     | SFTPB            |
| PSD4       | ZFR      | FBXL5    | RIPK3            |
| DBT        | SNN      | HS3ST3A  | TPPP             |
| PPARGC1B   | AUH      | NUDT6    | EXOSC1           |
| PDXDC1     | L1CAM    | CHCHD8   | USP25            |
| PRRT3      | HPS3     | SLC35A4  | OR51I1           |
| TMEM178    | ZNF479   | FAM65A   | RILP             |
| TAF7L      | PJA2     | HIST1H2A | IL32             |
| PLS1       | AGTPBP1  | C19orf53 | CDC42EP3         |
| P4HA2      | OR2H2    | SIX5     | FLT4             |
| SNAPC4     | DYNC1L1  | MAVS     | ARHGDIG          |
| NDUFA3     | KRTAP5-6 | YWHAG    | KIAA0319         |
| ESCO1      | NAT6     | STK35    | PION             |
| TPCN2      | CENPK    | NUDT10   | PCBD1            |
| GNPAT      | BCL9L    | SLC25A2  | ITPR2            |
| KLHL13     | PHF15    | CDC14B   | SLC22A10         |
| RPS6KL1    | FANCC    | DGAT2L6  | IQCC             |
| RP11-574F2 | ANKRD13  | FAM122B  | CAMKMT           |
| ARMCX6     | C7orf73  | TRIM54   | DARS             |
| AGAP10     | BCAR1    | DENND5E  | USP43            |
| C6orf126   | AK4      | SAP30    | RAP1GAP          |
| SVOPL      | MAFG     | STMN1    | ZNF25            |
| C3orf30    | MLEC     | ARL6IP4  | SYN3             |
| TRPT1      | HIST1H2B | YY2      | C9orf16          |
| RPS6KA5    | TYMS     | MT2A     | RP3-486B10.1.1   |
| RBM19      | AKAP2    | SIRT4    | RP11-1396O13.9.1 |
| PATE2      | YEATS4   | RBCK1    | OR51B4           |
| GOLIM4     | HCN2     | C22orf26 | WDR65            |
| MYH14      | KCNG3    | RAD1     | OR2L13           |
| CHADL      | MLXIP    | MAP4K5   | RP11-1035H13.3.1 |
| UCP3       | ELFN1    | ESPNL    | CCDC113          |
| TCEAL3     | BHLHE40  | RAB5A    | DGCR6L           |
| STXBP2     | RNF2     | IPMK     | LAMA2            |
| METTTL17   | SMARCD1  | SNRPB    |                  |

|           |          |          |
|-----------|----------|----------|
| LIX1      | SETD1B   | C22orf25 |
| VWA5A     | AFF3     | MAG      |
| TUBGCP2   | ZSCAN2   | PIP5K1A  |
| SPATA22   | VAMP3    | AP3D1    |
| GPR31     | TIGD1L2  | NUMBL    |
| PHTF1     | EMD      | PCDHGC4  |
| MTOR      | ZNF664   | PPT2     |
| HNF1A     | RBCK1    | HPDL     |
| SAT1      | STT3B    | PPAN     |
| CUL9      | HSD17B12 | SPHK1    |
| TM7SF2    | STXBP5   | MND1     |
| GPDI      | PDCD2    | RAB35    |
| MRPL55    | ISL2     | SLC10A3  |
| WDR83     | PRIMA1   | CNTFR    |
| KIAA0564  | EMP3     | HAUS2    |
| HES4      | FGFR1OP2 | OXCT1    |
| PABPN1L   | EIF1B    | POLR1E   |
| HAVCR1    | AC100808 | SCRN1    |
| NPFFR2    | SIGLEC15 | ZNF268   |
| BLOC1S1   | TKTL2    | PRRG1    |
| CELSR2    | RRAS     | NACC2    |
| OR1E1     | RCOR1    | KCNG3    |
| TUBA3D    | STK17A   | TRIM35   |
| TUT1      | KCNG2    | NAT16    |
| ZNF419    | HRCT1    | DCTN4    |
| ZFYVE27   | RRAGA    | ARPC3    |
| KCTD3     | HPRT1    | INSL3    |
| CYP2D6    | GNAL     | ARHGAP29 |
| KIAA1875  | RCE1     | TIMM23B  |
| OPHN1     | AMOTL2   | IFITM3   |
| ITLN2     | CCDC36   | PDZD8    |
| PABPC1L   | PGF      | PAIP1    |
| COG2      | SGCE     | MED22    |
| RAVER2    | SPCS1    | KLHL7    |
| RAB11FIP4 | CPS1     | ZNF599   |
| REN       | C3orf38  | ZFP91    |
| SLC43A1   | FGF11    | RHOC     |
| APOO      | CDC42EP2 | CTSL1    |
| PAIP2B    | COQ5     | TTC7B    |
| WBP1      | JRK      | DSCC1    |
| WNT11     | ZNF787   | SGOL2    |
| C7orf25   | RANBP1   | HRCT1    |
| FBXL15    | CELSR3   | HSBP1L1  |
| CHMP4A    | SSU72    | ACTN4    |
| FAF1      | ZNF891   | CTH      |
| COQ9      | GYS1     | ZNF596   |
| NDUFA13   | ERI3     | LHX5     |
| AQP12A    | B3GNT9   | FAM204A  |
| ZNF615    | PHPT1    | MYO1C    |
| ECI1      | UBE2M    | MRPL3    |

|            |          |                 |
|------------|----------|-----------------|
| OBP2A      | MRPL13   | FTSJD2          |
| SETD6      | SLC39A10 | CLEC18C         |
| PRDX6      | ISCA2    | NF2             |
| RNF113A    | TSPYL4   | CCDC85C         |
| ECH1       | SUB1     | SNX12           |
| ZNF239     | FAM205A  | NPBWR1          |
| TBCE       | PTF1A    | YIPF5           |
| RP11-353J1 | ZNF295   | SMAGP           |
| MARK3      | TOMM5    | C9orf172        |
| INO80B     | TTC9C    | TFAM            |
| AC131180.1 | SEH1L    | SNAPC2          |
| SLC22A5    | SMN1     | LMAN2L          |
| GREB1      | EPS15L1  | RP11-630A13.2.1 |
| CYP8B1     | WDR87    | HNRNPA3         |
| SAMM50     | ZNF852   | CDCA4           |
| CTAGE5     | CDH2     | APOPT1          |
| ANKRD39    | NOLC1    | TFR2            |
| FIBP       | BRIX1    | TSPYL4          |
| HADHB      | TBCA     | ARL10           |
| FAM176A    | TBC1D23  | ASPDH           |
| SSPO       | UBE2H    | C14orf43        |
| ALDH18A1   | EIF3B    | TOMM20          |
| KIAA1324L  | ZIC2     | HK1             |
| SP140L     | MEF2BNB  | TAP1            |
| RFX5       | CDKN2AIF | GOT2            |
| SF3B1      | GARNL3   | HIST1H1A        |
| TBCC       | RAD23B   | SP9             |
| TRPS1      | RAB8B    | TRUB2           |
| ITSN2      | CTNS     | NECAP2          |
| TTC12      | GPR32    | MEGF8           |
| ZNF282     | SP5      | TRIM7           |
| MYH6       | MPP6     | FGFBP3          |
| SURF1      | CD274    | KIAA0020        |
| C14orf102  | FKBP1C   | ITPRIP          |
| ALDH7A1    | PTPRG    | WNK3            |
| IFT122     | FAM120A  | SHQ1            |
| OPRL1      | MEMO1    | TMBIM1          |
| PPP1R12C   | GRM2     | DCAF16          |
| HOXB8      | MKRN2    | FBXO47          |
| MST1R      | ANKLE2   | TGFB1           |
| LGALS3BP   | KIF17    | PLP2            |
| STX18      | STX2     | CRAT            |
| WDR33      | BCL2L1   | LRRRC8A         |
| SCHIP1     | ZC3H15   | GJC1            |
| ACADL      | MCM4     | MTA2            |
| HSP90B1    | RBL1     | CD300LD         |
| USP16      | BEGAIN   | PTBP3           |
| UTP20      | CDRT1    | MFRP            |
| ZNF487P    | MXRA8    | WDR46           |
| ITGB1BP2   | MFRP     | CD3EAP          |



|            |          |            |
|------------|----------|------------|
| PAN2       | PAFAH1B  | TPX2       |
| HSD17B7    | ATL3     | TPM3       |
| ZMYM4      | ZNF880   | CNBP       |
| RP11-1286f | RBM42    | NDUFB4     |
| SAGE1      | GOLGA7   | HSPB2.1    |
| FAM71E1    | SRRD     | DSEL       |
| TMEM234    | SEC22A   | TPBG       |
| RDH8       | MRPL32   | ZNF716     |
| POC1B-GAL  | C5orf22  | C9orf89    |
| TTC3       | UBAP2    | SETD1B     |
| CTPS2      | C12orf52 | ARL2       |
| PPFIA4     | RNF112   | HIST2H2AA4 |
| LSM10      | FRMD8    | HAPLN4     |
| GCFC1      | ACCN4    | TONSL      |
| RGPD3      | SUSD3    | UCMA       |
| AC004381.f | PRDM10   | SGTA       |
| RAD50      | MEGF8    | PCDHA13    |
| GLT25D2    | NAB2     | CAGE1      |
| CAPN10     | YY2      | NKIRAS1    |
| TAX1BP1    | GRHPR    | XRN2       |
| OR3A3      | MRPL43   | ISM2       |
| GTF2B      | S100A11  | PSG11      |
| METTL3     | ABL1     | MAPRE1     |
| C22orf40   | TMEM55   | TOMM40     |
| C16orf46   | RP11-93K | ATP2B1     |
| RMND1      | TFAP4    | C19orf57   |
| B3GALT5    | SRGAP1   | FAM70B     |
| ZNF19      | PTPRB    | DNAJC21    |
| TMEM74B    | EXOSC3   | MTMR12     |
| PTRH1      | KHSRP    | CIDEA      |
| EPB41L5    | MRPS36   | AOC2       |
| C2orf78    | CAGE1    | RBM48      |
| GCNT2      | SKA3     | BAG3       |
| BBS5       | GTF2H2C  | LRRC42     |
| NOP58      | MAP4K5   | MIR3654    |
| TEAD4      | CITED2   | FBXO43     |
| DNA2       | AKT3     | C9orf5     |
| STK38      | CYTH2    | RAB3D      |
| PRPF39     | GIPC3    | TRIM28     |
| MCOLN3     | NFIX     | PDE12      |
| ZNF547     | VAV2     | FAM131A    |
| ATP6V0E2   | ELK3     | SKA1       |
| CCBP2      | ERGIC2   | ANP32B     |
| FAM192A    | TMEFF1   | C12orf24   |
| DSCR6      | AHSG     | LDHC       |
| ZNF704     | GPR150   | PHF19      |
| SCAPER     | PTPLB    | AGTPBP1    |
| LYRM2      | RGP1     | SERINC3    |
| ZNF473     | RABEPK   | FAM57A     |
| SGSM2      | RBM48    | PIGZ       |

|           |          |            |
|-----------|----------|------------|
| RBM33     | ANAPC10  | C5orf62    |
| USP54     | BRD4     | BFAR       |
| SLC30A10  | CD59     | CUL2       |
| DEFB107B  | RAB43    | SRSF1      |
| ZNF638    | CIZ1     | KIF17      |
| CEP57L1   | NCKAP1   | TMEM186    |
| CEBPZ     | TFPI2    | ATE1       |
| MTA3      | EFEMP1   | GRHPR      |
| CHRNA7    | MND1     | AP3S1      |
| CHRNA7    | PPP4R2   | VTI1B      |
| ANKRD53   | SS18L2   | VRK3       |
| KIF22     | SSH1     | HOMER1     |
| RNF151    | TMEM235  | VGLL2      |
| NSUN7     | CERS1    | AC011498.1 |
| OGDHL     | SYNPO2L  | SMARCB1    |
| WIPF3     | AGBL3    | C6orf57    |
| RBM6      | IGDCC4   | ROMO1      |
| UTF1      | SIK2     | GATAD2A    |
| RTN4IP1   | EDIL3    | CENPK      |
| EPCAM     | ZCWPW1   | TMPRSS9    |
| ARMCX4    | AIG1     | CSRNP2     |
| KIAA1383  | FADS2    | TATDN2     |
| MAP7D2    | FUCA2    | PDCD6      |
| NUB1      | MTFMT    | SYNPO2L    |
| LONP2     | RP11-849 | KLHDC10    |
| OR11H12.1 | C3orf78  | BTBD2      |
| OGFR      | CHRAC1   | OTP        |
| RS1       | PRR24    | PSMF1      |
| GATM      | CYB5B    | PTGR1      |
| DAPK1     | ERBB2IP  | NAA50      |
| SRSF6     | TRUB1    | FBL        |
| ANKRD36B  | TMEM205  | SRRD       |
| RPAP2     | DNM1     | RPE        |
| RP11-1286 | CES2     | CSTF3      |
| GOLGA4    | HERPUD2  | TFE3       |
| CDK5RAP3  | HIST1H2B | CRK        |
| SIN3B     | ADAM11   | PROCR      |
| RSAD2     | NSUN3    | NSMCE2     |
| GBA       | TRIM54   | ZNF408     |
| TTC21B    | BASP1    | TIGD6      |
| DDX58     | YKT6     | VDAC2      |
| CYB5D2    | GJA3     | NAA15      |
| PGBD4     | SLC25A1  | LRR58      |
| COBL      | PLEKHA4  | SDHB       |
| SNX14     | MRPL11   | TXLNA      |
| EIF2AK1   | ATP13A3  | TMEM69     |
| TEC       | SLC5A10  | PPP1R13L   |
| DSCR4     | HINT1    | C9orf41    |
| CHAF1B    | ZNF623   | ZC3H4      |
| CATSPER2  | HSF2BP   | CD163L1    |

|          |          |                 |
|----------|----------|-----------------|
| FAM96B   | MSN      | ZNF395          |
| SRGAP3   | RNF4     | OSBP            |
| ZNF845   | ADM      | TCEB1           |
| RGL3     | ZCCHC9   | SPATA5          |
| STK36    | PTGER1   | METTLL15        |
| KRI1     | LCNL1    | C11orf85        |
| FARP2    | STEAP3   | KLHL21          |
| SLIT1    | CAMK2N1  | SEC14L2         |
| ELMOD1   | GINS3    | C6orf195        |
| MRPL46.1 | EIF2S3   | FBXO45          |
| ZNF761   | DCDC2C   | INPP5F          |
| PRR15    | TPBG     | C5orf34         |
| ZNF559   | IGFBP1   | SLC38A1         |
| PLCB1    | ZCWPW2   | DAZAP1          |
| ZNF709   | COL11A2  | RP11-293114.2.1 |
| MTHFS    | TMEM11   | TMEM200B        |
| FAM164C  | HERC4    | LGALS1          |
| TTC39B   | GAS2L1   | UBA2            |
| SRA1     | GLO1     | CAPRIN2         |
| CCZ1B    | ZMYND19  | ZNF622          |
| MTERFD3  | C13orf16 | PGRMC2          |
| NCKAP5L  | TNFRSF10 | NT5DC2          |
| DNASE1   | PLK1     | NR1D2           |
| EGFLAM   | TAF10    | GSPT1           |
| TMEM184A | ROBO4    | OGFOD2          |
| GAB4     | PRICKLE3 | ZFAND2A         |
| SLC4A10  | TFE3     | PLXNA1          |
| PIGL     | POLR2E   | RASGEF1C        |
| SLC5A11  | TOR1A    | ASAP1           |
| CHPF2    | TBC1D2   | FBXL18          |
| FAAH2    | MAGOHB   | UBE2E2          |
| CEP164   | ZBTB46   | ISYNA1          |
| GNAS     | ASPH     | FAM127B         |
| PHKA2    | NDUFAF3  | IKBIP           |
| C10orf32 | TRIM71   | GPBR            |
| NAP1L2   | MTMR12   | CTDSPL          |
| PRPF38B  | PACRGL   | C11orf57        |
| CBX8     | HMMR     | IL1RAP          |
| KRT20    | SLC31A2  | IL1RAP          |
| GMEB2    | C9orf172 | CBY3            |
| CEBPA    | NR1D1    | MEMO1           |
| GOLGA5   | LYRM4    | FUCA2           |
| ASGR1    | MPP5     | BTBD19          |
| RANBP10  | C11orf71 | PSIP1           |
| MIA      | THOC6    | TBC1D23         |
| WRAP73   | SWI5     | C4orf46         |
| ATN1     | KCTD7    | EBF3            |
| ACSS2    | CREB5    | PLEKHG2         |
| DCDC2    | EEA1     | OLFML2A         |
| TFPT     | CDV3     | CNTNAP1         |

|           |          |            |
|-----------|----------|------------|
| CCDC64    | ZDHHC5   | KLHDC8B    |
| KLHDC7A   | GIN54    | TANK       |
| PLCE1     | IPO11    | CUL4B      |
| C19orf63  | NDUFS6   | SEC61A2    |
| ACBD7     | ELOVL2   | TMEM151B   |
| IFT52     | BICD1    | ODF3L2     |
| SLC26A8   | KNTC1    | C19orf55   |
| ZNF679    | AKT1S1   | OR2A14     |
| CST11     | TMEM39   | FCHO1      |
| RTP4      | NUMBL    | GDF1       |
| ZMYND11   | C13orf27 | CLTA       |
| E2F7      | ASF1B    | C2orf89    |
| SNX29     | SLC25A32 | IFITM2     |
| NADSYN1   | C3orf49  | MBTPS2     |
| CCDC148   | FLG      | ZNF570     |
| ALAD      | DHX33    | TAF9       |
| ZNF774    | MED30    | PRRC1      |
| SLC4A9    | AKAP5    | PNLIP      |
| NARG2     | ALDOA    | CAST       |
| DYRK3     | UBE2U    | RNF114     |
| CTNBL1    | URM1     | MAGOH      |
| ZNF433    | CERCAM   | FAM134A    |
| FBXO42    | DTD1     | MAPK12     |
| DDX24     | CD3EAP   | EMD        |
| ILVBL     | TMEM18   | SLC4A1     |
| ZNF783    | FAM20C   | PPP2R5B    |
| NBEAL2    | C16orf11 | MPP6       |
| KIF4B     | THY1     | TYMS       |
| AGXT      | CNTNAP1  | SRGAP1     |
| TRMT1L    | KLK1     | KXD1       |
| SLC25A14  | CELF4    | VAV2       |
| PMS1      | OPA3     | C12orf65   |
| ACP6      | GLS      | CDH2       |
| ANKRD45   | ATXN1L   | NT5E       |
| TUBA3C    | SEC23A   | PHPT1      |
| POLR1C    | HIF1AN   | POLR2H     |
| PILRB     | GPER     | EIF6       |
| HNF4G     | MED9     | MNT        |
| NXF5      | C16orf61 | AC100775.1 |
| C14orf159 | ZCCHC2   | TFPI2      |
| NUDT22    | CA5B     | CAPNS1     |
| WDR5B     | EME2     | RABL3      |
| C1orf61   | ABHD6    | TMEM240    |
| SYTL3     | PPP6R1   | EPM2AIP1   |
| FAM213A   | LDHA     | MATN4      |
| IDH1      | UBE2D2   | MYO10      |
| FBXO11    | MTA2     | METTL6     |
| NOP2      | TRNT1    | UBE2Z      |
| CEP70     | NXT1     | ALLC       |
| BCL2L14   | NANS     | FAM120AOS  |

|           |          |                |
|-----------|----------|----------------|
| GPHA2     | NACC2    | HSCB           |
| UBC       | MAPRE1   | RBM12          |
| OPLAH     | TSR2     | ERI3           |
| MCAM      | ALLC     | SLITRK1        |
| PACSIN1   | RNF5     | PANK2          |
| OR52B6    | C19orf55 | ANKRD30B       |
| ZNF439    | TMEM132  | CDCA8          |
| ANKRD35   | MYL9     | AURKAIP1       |
| MAN2C1    | TUBA4A   | PC             |
| CSAD      | SP7      | CCDC73         |
| CEP104    | IGF2BP3  | SDCBP          |
| SETMAR    | DHFRL1   | FAM9A          |
| TXNRD1    | ZIC5     | HAS2           |
| RIPK2     | GBE1     | TIMM44         |
| LRP6      | AP3B1    | QRSL1          |
| RBM39     | MRPS35   | RAP1B          |
| EML1      | SLC35F2  | CDCA7          |
| ACTN2     | GAPDHS   | NSUN2          |
| FBP2      | NKIRAS1  | BCCIP          |
| FAM162A   | PSMB2    | HP1BP3         |
| CHD8      | SLC2A1   | PCMT1          |
| DOCK1     | ASB14    | C1orf216       |
| ACAD11    | ZFC3H1   | PDRG1          |
| CEP85     | XKR9     | ARF6           |
| SRPK2     | TMED7-TI | DAP            |
| ZNF613    | BDP1     | SEC24C         |
| TCN2      | TMX1     | LARP1          |
| PSMA5     | ULBP2    | EAF1           |
| ATP6V1H   | KLF6     | NDUFC2         |
| KIAA0895L | HNRNPAB  | GFRA1          |
| ALDH16A1  | FAM196A  | TPD52L2        |
| SPATA2L   | CMC1     | VPS26A         |
| CLCN4     | GNA11    | ACN9           |
| PDE6A     | ZC3HAV1  | C6orf120       |
| ALDH4A1   | CRYAB    | ACCN2          |
| CGN       | THAP2    | CLSPN          |
| LTA4H     | RP5-972B | GRINA          |
| UPK1A     | IL1RL2   | ELOVL3         |
| RNF213    | NRSN2    | SERF1A         |
| TIGD4     | TADA3    | ZNF623         |
| ATG4B     | HSD17B14 | SPHAR          |
| ZDHHC23   | UBA3     | CDK7           |
| C1orf56   | BRAP     | UPK3B          |
| FASTKD1   | 10-Sep   | C3orf14        |
| BCAP31    | C6orf48  | RP11-849H4.2.1 |
| AGPHD1    | AP2S1    | DDX51          |
| HPR       | RPSAP58  | RASA1          |
| RHPN2     | CAMLG    | TUFM           |
| MBD6      | POLE3    | LSM4           |
| ENPP3     | NF2      | MAEA           |

|           |           |                 |
|-----------|-----------|-----------------|
| KIAA1614  | FHL2      | SHC1            |
| ABCA5     | ACN9      | PTRF            |
| CPB1      | PTPN12    | C3orf37         |
| HEXDC     | THOC5     | TCP11           |
| ACOX3     | C14orf105 | GRK1            |
| ZNF681    | STMN3     | CD274           |
| FIG4      | SGK196.1  | FEZF2           |
| ABHD11    | PAICS     | CTU1            |
| TMEM111   | TMEM184   | ZNF121          |
| REPS1     | SERF1A    | NOP14           |
| GTPBP4    | GOLT1B    | RP11-111K18.1.1 |
| SPNS1     | HIST1H3J  | NRIP3           |
| LTBP1     | SYS1-DBN  | ARL6IP6         |
| FN3K      | CLPTM1    | CHML            |
| PCK1      | HIGD1A    | EIF4H           |
| QPRT      | STAM      | BAG6            |
| POTEI     | BCAS4     | NOV             |
| RGL2      | SLK       | CRKL            |
| RAB17     | ELAVL1    | C11orf48        |
| PARP6     | IRGM      | NCLN            |
| ZNF160    | STK32C    | THAP2           |
| HEXA      | RFPL1     | NFIL3           |
| C1orf210  | F2R       | UTP15           |
| NDUFB8    | HIST2H3C  | TIMM50          |
| CD40      | TNFRSF12  | ARPC4-TTLL3     |
| RP11-977G | BBS10     | MRPL21          |
| PSMD4     | USP53     | RP11-585F1.10.1 |
| DDX60     | ATF6B     | IPO7            |
| RBM45     | FAM120C   | ATAD3A          |
| DCAF8     | FBL       | FPGS            |
| TMEM9     | RAD18     | SLC23A3         |
| GATC      | ZC3H12B   | SIGMAR1         |
| SPTBN5    | SLMO1     | OTUD6B          |
| HYLS1     | PIAS2     | TMEM14B         |
| C20orf118 | MYO1C     | RAB11FIP5       |
| ARTN      | GNE       | RP11-122A3.2.1  |
| 01-Mar    | TCP11     | ITGA5           |
| REV1      | SYDE1     | SSH1            |
| WDR34     | FAM40B    | DNAJC19         |
| ESRRG     | KIAA0664  | BCKDHB          |
| ZNF10     | OXSRI     | CNPPD1          |
| C21orf58  | WDFY1     | GALNT9          |
| NCALD     | ZNF660    | BCL9L           |
| CUL7      | KIAA1967  | IL11            |
| PCDH15    | FSCN3     | AVPI1           |
| TBX19     | LRRC61    | ANO4            |
| ITGA7     | GPX8      | AC091153.1      |
| KCNIP4    | DUS4L     | EXOSC6          |
| ANAPC2    | RAB2A     | BSG             |
| IFNAR1    | RPSA      | PPID            |

|          |          |              |
|----------|----------|--------------|
| AP1M2    | MPHOSP   | WDR82        |
| BRD7     | FAM72A   | ADAMTS6      |
| TIMM17B  | PRDM4    | SSFA2        |
| C7orf59  | MUL1     | PDCD5        |
| ZNF350   | ITGA5    | AP3B1        |
| NLRP8    | RP11-3N2 | PCDHB14      |
| SLC15A1  | ENY2     | NTN3         |
| ZSCAN20  | QTRTD1   | PPIA         |
| TMED3    | PRIM1    | INCA1        |
| TMEM164  | UCHL1    | FGF2         |
| USP17L5  | KIAA1191 | SDC2         |
| ZNF444   | C6orf195 | NR2C2        |
| TDRD5    | EIF2A    | NOL7         |
| DNTTIP2  | PSMC4    | TNFRSF12A    |
| ZNF416   | PRSS33   | FAM102A      |
| AHSA2    | ZNF598   | ACTL6A       |
| MYL5     | LIN7C    | GPR176       |
| ARMCX1   | C5orf35  | CRTAP        |
| RBM5     | PVR      | PLCD3        |
| PYCR2    | CTSL1    | TBC1D19      |
| MTIF2    | AFF4     | SAE1         |
| ZNF443   | SYT14    | WASF1        |
| HEATR5B  | PA2G4    | HK2          |
| LDHB     | ZNF654   | AC026271.6.1 |
| C2orf56  | NDUFB4   | SCML1        |
| NOP56    | UQCRB    | FAM180A      |
| PCSK7    | RAD21L1  | C10orf122    |
| EDEM2    | ZNF141   | BATF2        |
| SAG      | GLE1     | USP22        |
| KPTN     | HP1BP3   | SRPK1        |
| GDF3     | SMARCC1  | UBE2F        |
| UTP14A   | RALB     | RBBP9        |
| TNRC18   | FAM120A  | BCL2L13      |
| ALMS1    | GAPDH    | FXR2         |
| PRPF4    | CPNE8    | NTAN1        |
| PRKCD    | NAA30    | POLR2J2      |
| USP48    | BACE1    | MRPL30       |
| ZNF799   | ETS1     | PBX3         |
| MAB21L3  | ZNF724P  | TMEM110      |
| ZNF544   | PCDHGB4  | MUTED        |
| DDX39A   | TBCB     | MAPKAPK5     |
| HOOK2    | POM121   | B3GNT4       |
| CPPED1   | VPRBP    | PGF          |
| POLR2C   | CDC20    | STT3B        |
| C6orf170 | C1orf187 | PEX2         |
| GTF2IRD2 | NLGN1    | MRPL22       |
| ZNF773   | ARL2     | UROS         |
| LRRC45   | SPTY2D1  | ATG13        |
| UNC45A   | FAM101B  | TAF9B        |
| UNC45A   | SLC25A24 | OSGIN2       |

|           |          |              |
|-----------|----------|--------------|
| GOLGA6L9  | ATG10    | LSM3         |
| ZNF57     | RAX      | ORC2         |
| EML2      | C7orf42  | PRDM12       |
| ERGIC3    | GRINA    | USP14        |
| POP5      | REEP3    | THRSP        |
| AIF1L     | PDCD10   | PRDM10       |
| KIAA1737  | HBB      | TKTL2        |
| TTC30A    | TULP1    | STK25        |
| C2orf82   | POLR1E   | NANP         |
| SORL1     | UCMA     | RNF130       |
| CLDN25    | C14orf17 | SMS          |
| OR52B2    | KDEL2    | SIRT5        |
| OR2C3     | DSCC1    | ISY1         |
| GAD2      | ETHE1    | TARS         |
| CLCN2     | NSMCE2   | ADAMTSL5     |
| ZFP90     | STK39    | SMARCD1      |
| CEP250    | IGF2BP2  | NOL9         |
| RP11-1286 | FXN      | ADNP         |
| SCCPDH    | ZNF580   | STK39        |
| MYO7A     | FAM164A  | CTNS         |
| THOC2     | XRRA1    | PCGF6        |
| EXTL2     | NPM1     | PTPRB        |
| SLC35E3   | QRSL1    | PLEKHA4      |
| ASL       | DIXDC1   | ELAVL1       |
| SCRN2     | CSPG5    | TBCB         |
| C20orf43  | SNAPC3   | NAA20        |
| LRRC37A2  | C14orf39 | UBXN7        |
| ATP6V1C2  | C6orf120 | ACTN3        |
| CEP290    | STARD6   | UNC119B      |
| GATAD1    | STC1     | AGBL3        |
| GGA2      | PSMB6    | KDM2A        |
| PCDHB5    | SLC37A2  | RIF1         |
| MED23     | C5orf15  | C1orf51      |
| ECI2      | TIGD6    | SHARPIN      |
| WDR52     | RNF212   | CREB3        |
| SNX25     | NOP14    | ZHX1-C8ORF76 |
| SENP6     | LINC0049 | UBA3         |
| PARD3B    | OR2A14   | SLC5A3       |
| UBAC1     | NAA50    | C10orf47     |
| DSCR8     | RAB6A    | CDK4         |
| PGBD2     | CECR6    | MOCS3        |
| NDUFA10   | SLC27A4  | PLCB3        |
| HOGA1     | LMNA     | GLO1         |
| GTF2H4    | BTBD11   | ATXN2L       |
| NDUFV1    | KCNK3    | PPAT         |
| TCEANC2   | AQP11    | KIAA1826     |
| COL9A3    | SQSTM1   | RFC5         |
| HIPK2     | DNAJC19  | PRR3         |
| ZNF541    | GNAT1    | ACTR10       |
| ZNF607    | C22orf25 | GLIPR1       |



|           |          |          |
|-----------|----------|----------|
| RHPN1     | INVS     | ST5      |
| GTPBP6    | MAT2A    | GTF3C4   |
| RIMKLA    | NOV      | PTPLB    |
| PTCD3     | TMEM39E  | GNA12    |
| TNRC6A    | EEF1E1   | QRFPR    |
| TMCO4     | RPH3A    | SOX15    |
| AGK       | DMWD     | C5orf65  |
| UNC13A    | C11orf65 | FAM40B   |
| ANKRD20A  | CCDC58   | MRPL2    |
| DSTYK     | PTPN23   | CAP2     |
| IRF2BP1   | CPOX     | USP42    |
| NUMA1     | RPL27    | IL5      |
| MAST2     | ZNF501   | FAM20C   |
| PRMT7     | PURA     | EIF4G1   |
| IFT80     | SFR1     | GPR172A  |
| SUV420H1  | RBM3     | CLOCK    |
| CSRNP3    | ATF7     | FYTTD1   |
| HHAT      | PNO1     | PRPSAP2  |
| MX2       | COTL1    | MIR4720  |
| RABEP2    | PRRX2    | ZNF805   |
| GRHL2     | PIN4     | SLC16A1  |
| CNOT1     | TCTA     | PTPMT1   |
| SUPT7L    | PYGL     | HNRNPUL2 |
| PNPT1     | MYOM3    | NRBP1    |
| AMN1      | MYBBP1A  | C11orf30 |
| RP5-1180C | NUTF2    | RPLP0    |
| LGALS14   | NPC1     | RNF10    |
| C10orf11  | PCDHB12  | G3BP1    |
| ANKRD36   | KCNK13   | SDCCAG3  |
| DIP2C     | PSG11    | ACTN1    |
| PRSS50    | GSG2     | BRD4     |
| ANKRD63   | GSK3A    | RAB1B    |
| ASTE1     | WNT7A    | GJA3     |
| GPR89B    | CASC3    | TMEM44   |
| C17orf56  | CFL2     | STAT1    |
| ZNF516    | FCHO1    | SIK2     |
| RPN2      | EXOSC6   | NR1D1    |
| SAMD9L    | AC013461 | SIGLEC15 |
| PARP2     | CYB5R2   | SF3A2    |
| CACNG7    | VTI1B    | KDM4D    |
| HLCS      | NR2C2AP  | IRGM     |
| ZDHHC12   | GXYLT2   | ERCC1    |
| RDH13     | CCDC71   | NRF1     |
| UBB       | SURF4    | METTL5   |
| ZNF701    | PWWP2A   | C17orf74 |
| TRMT5     | HIST2H2B | ARMC6    |
| WIBG      | MRPL3    | GNG12    |
| NOMO3     | GPR173   | PFN1     |
| MSH2      | MRPL22   | TOMM34   |
| CIAPIN1   | RASA1    | RRAS     |

|            |          |          |
|------------|----------|----------|
| HOXB6      | SLC2A3   | NOXRED1  |
| KLK8       | BAG3     | HIST1H3D |
| ZNF627     | SPRN     | TMEM38B  |
| TIA1       | ASPDH    | CAD      |
| DMTF1      | KIAA0947 | ENO2     |
| BUD13      | ACVR1    | SRMS     |
| GDAP1L1    | ACYP1    | PITX3    |
| PCDHA2     | IFRD2    | NR2C2AP  |
| INHBE      | FAM49B   | SETD1A   |
| RBM25      | SPC25    | ROBO3    |
| EGR4       | PTGR1    | RNF112   |
| ATP6V1G2-  | FAM204A  | CCDC124  |
| SAFB2      | RPL37    | QSER1    |
| ODZ1       | CCDC90A  | ZMYND19  |
| GABRR1     | DPYSL3   | CTNNAL1  |
| FAM103A1   | CBY3     | RABEPK   |
| ZNF253     | NME2     | TUBA1B   |
| LPPR3.1    | PTP4A2   | FLNA     |
| TAF6L      | TMED7    | WFDC8    |
| ART5       | SRSF1    | C5orf43  |
| HAUS8      | FYTTD1   | TIGD1    |
| CCT7       | TMPRSS9  | KIAA0907 |
| RP11-6F2.7 | PTAR1    | TMEM88B  |
| DDX28      | ASPHD2   | PRPS1    |
| SRSF7      | OXCT1    | CENPA    |
| NACA       | CENPW    | CITED2   |
| TRMT11     | HNRNPC   | TRIM56   |
| RANBP2     | PPP1CC   | NETO2    |
| MBD4       | SP3      | ZNF292   |
| TAPBPL     | MIS18A   | C7orf11  |
| ACIN1      | F3       | ELOVL4   |
| CREB3L4    | CCK      | NDUFA12  |
| SMG7       | TEX264   | TCTE3    |
| PRRG2      | CAPRIN2  | NPC1     |
| CCT6B      | ZNF716   | WASL     |
| VEPH1      | EIF4A1   | C4orf43  |
| TAS2R31    | PINK1    | TSEN34   |
| UGP2       | SERTAD2  | FBXO41   |
| CEP350     | BCL7B    | TWIST2   |
| MYPN       | RBFOX2   | MFAP5    |
| PPP6R2     | KCTD10   | C9orf21  |
| EHMT1      | HNRNPR   | RFX1     |
| ZNF17      | SRP72    | WDR43    |
| C6orf127   | LETMD1   | PAOX     |
| C19orf77   | RPL35    | ZNF585A  |
| TH1L       | CHURC1   | CACNB4   |
| IL17RB     | RPP30    | ULBP2    |
| PTPN18     | BFAR     | POLE4    |
| CLN6       | NFIL3    | NLRP9    |
| TLN2       | MAP7D3   | MRPL47   |

|           |          |                |
|-----------|----------|----------------|
| TLN2      | GZMK     | ZFP64          |
| TOP2B     | FGFBP3   | ZNF259         |
| CCDC138   | RP11-196 | NPTX2          |
| JMJD7-PLA | YWHAZ    | SPIN1          |
| OR56A3    | TAMM41   | AP1M1          |
| SPZ1      | RAB28    | RPS3           |
| ERBB4     | RPS18    | SRD5A1         |
| DIP2A     | TBC1D22E | GFM1           |
| AMIGO1    | RRP1B    | NIT2           |
| DAGLA     | FAM72B   | ZNF140         |
| ZNF614    | COL4A3Bf | NRBP2          |
| ATP6V0B   | ELOVL4   | NLN            |
| HARS      | C5orf65  | LSM6           |
| TCEAL4    | NDST1    | RPUSD3         |
| NDUFA9    | NDST1    | SEC22C         |
| CHORDC1   | COPZ2    | ABL1           |
| SH3GL3    | TP53TG5  | FTH1           |
| CHRM5     | PROS1    | DNAJC9         |
| PHF20     | ZNF334   | CMTM6          |
| DRG2      | LASP1    | RASAL2         |
| RP11-357H | ARL6IP4  | GLIS3          |
| FAM169A   | AP1M1    | AP002884.2.1   |
| ZNF513    | NDUFC2   | CTC-260F20.3.1 |
| FAHD2A    | CCDC9    | ZNF85          |
| GABPB2    | ERH      | SERPINH1       |
| FBN3      | KCTD9    | KIAA1191       |
| XPNPEP1   | CCDC15   | STK11          |
| MAP3K7    | XIRP1    | RP11-87C12.2.1 |
| CLDN10    | LSM4     | RFWD3          |
| TJAP1     | ANKRD33  | TROAP          |
| TFRC      | PTP4A1   | ATP5G3         |
| CASP7     | POLR2H   | MTG1           |
| GOLGB1    | CKS1B    | RP5-972B16.2.1 |
| KLHDC9    | RPS3     | GPX5           |
| HACE1     | C8orf44  | U2AF1          |
| ZNF556    | SH3BGRL3 | UBE2D2         |
| RAB3GAP1  | SPPL3.1  | XKR3           |
| MX1       | PCIF1    | ZC3H8          |
| DNAJB8    | KCNV2    | HMMR           |
| CDK5RAP1  | NSFL1C   | CREB5          |
| XPO1      | PRDM12   | DEFB118        |
| AMPD2     | NXPH2    | SPATA21        |
| TBC1D1    | POLD2    | TCOF1          |
| ANXA4     | ISCA1    | PHF7           |
| ZNF552    | FAM133A  | GLUD1          |
| ZCCHC17   | SLC35A2  | ARL9           |
| GTF2IRD2B | HIGD2A   | TMOD4          |
| ANKMY2    | TM2D2    | STRN4          |
| MMEL1     | C22orf39 | CBWD3          |
| AHCTF1    | HYAL2    | NANS           |

|            |          |           |
|------------|----------|-----------|
| NEBL       | STYX     | NRSN2     |
| ASTN2      | TMEM167  | GLE1      |
| ODF2L      | SYNGAP1  | THOC6     |
| HDHD3      | SFXN5    | SCAF4     |
| ADAL       | ZRANB3   | CRBN      |
| MAP3K11    | TXNL1    | YARS2     |
| STAP2      | F8       | SENP1     |
| ZGPAT      | PRR3     | FAM64A    |
| DCLRE1A    | C9orf82  | NLGN1     |
| ZHX3       | NTSR1    | TATDN1    |
| GRB14      | SLC35B2  | DTD1      |
| ZNF200     | KDM4D    | FGFR1     |
| APC        | PPP1R15A | LIN52     |
| FMO6P      | C2orf89  | LMNA      |
| NOMO2      | MELK     | PRDM13    |
| TTC7A      | SNAPC1   | YWHAE     |
| TAS1R1     | SPRYD4   | DPF1      |
| TBC1D8     | FADS1    | C11orf65  |
| HOXB5      | 05-Mar   | GTPBP8    |
| CREG1      | TP53RK   | PEX26     |
| CLPB       | CDYL2    | PNO1      |
| ZNF766     | CA12     | KLF12     |
| FAM174B    | SMNDC1   | ZNF653    |
| SP100      | UTP15    | PYCRL     |
| PLEKHG5    | UNG      | KCNV2     |
| NMB        | DAP      | ZFYVE20   |
| FAM120B    | BRD2     | CHN1      |
| CEP95      | FAM211A  | KLF6      |
| PPDPF      | OR1Q1    | HIST2H2BE |
| SRSF5      | PSMB9    | TMEM184C  |
| FAM161B    | HDGFL1   | DMWD      |
| TCP1       | SMTNL1   | MUL1      |
| DTX3       | LDHC     | GFPT2     |
| IQCB1      | GTF2H2   | CPNE1     |
| WDR91      | RAN      | RPL8      |
| IFI27      | GNB1     | UBE2H     |
| PIKFYVE    | BOD1     | KCNJ14    |
| RP11-1286f | LRFN1    | AUH       |
| HIRIP3     | PCMT1    | CELF4     |
| RNF183     | PEX13    | NDUFB6    |
| POTEH      | MB21D2   | HNRNPUL1  |
| SCNM1      | GINS1    | ISCA2     |
| MAGEB6     | ACTN1    | HERC4     |
| SHF        | MTX2     | XYLB      |
| PLA2G4D    | RPL36    | DOM3Z     |
| AKAP17A    | STMN1    | MFI2      |
| C22orf42   | ADO      | FIP1L1    |
| C20orf111  | SLC2A10  | WDR4      |
| PDCD11     | AP2M1    | FAM199X   |
| BEND5      | TMEM194  | P2RX3     |

|            |          |            |
|------------|----------|------------|
| PRDM15     | KXD1     | HIVEP2     |
| RRP1       | EOMES    | MED29      |
| UBE2CBP    | THRSP    | RMI1       |
| ARFRP1     | GLP2R    | MED15      |
| RRN3       | YBX1     | CD44       |
| IFIH1      | PRPF40A  | HIST2H2BF  |
| PRADC1     | MRPL47   | TOR1A      |
| ELP2       | PCDHGC4  | DALRD3     |
| ARFGEF2    | AC008073 | CENPW      |
| ANKZF1     | PPP3CB   | ZNF526     |
| C1orf27    | ABCA1    | CEP41      |
| PLA2G2C    | GMPS     | C10orf88   |
| INPPL1     | PKN3     | PDCD10     |
| ZNF432     | SEC22C   | C3orf49    |
| DDX27      | SPRY4    | CHRDL1     |
| CNTN5      | NOXO1    | C12orf76   |
| C2orf72    | ABHD5    | LRRN4CL    |
| CCNI2      | FHL3     | PAWR       |
| RGPD6      | CDK17    | P2RX6      |
| TOP3B      | TYW3     | SLC2A3     |
| CBWD2      | SAP18    | ELK1       |
| RP11-632K  | ZNF736   | SQSTM1     |
| PARP9      | RP11-728 | CA9        |
| GTF3C1     | SLC35E4  | PRKAA1     |
| MTR        | PSG5     | HSPA14     |
| DNASE2     | MPO      | VMA21      |
| TNFRSF25   | NUDT21   | NOA1       |
| PFKFB1     | MAPK11   | PRRT2      |
| APLF       | PORCN    | DDX55      |
| C17orf61   | RP11-286 | TMEM11     |
| NVL        | RPRD1A   | SLC9A3     |
| LAS1L      | PPP1R13L | NDUFB9     |
| RNF8       | DENND1A  | SATB2      |
| PAGE4      | SDC2     | CHKA       |
| DNAJC17    | CAPZA2   | SPANXN1    |
| NKAP       | DSCR3    | AC078802.1 |
| C15orf38-A | C10orf2  | FNTA       |
| CLK1       | BEST2    | KIRREL     |
| CLMN       | NLN      | SPRY4      |
| HENMT1     | HIST4H4  | TMEM201    |
| C10orf28   | TRAPPC2F | DBNDD2     |
| PPIP5K1    | TOMM40   | KPNA1      |
| PRPF40B    | PPP6C    | FRMD5      |
| CUL3       | SUGP1    | PLAUR      |
| CDC40      | CEP72    | COPZ1      |
| AGBL5      | PSMC3IP  | KIF20A     |
| IVD        | ARIH2    | ZNF551     |
| H2AFJ      | MMP23B   | PRKCSH     |
| ARMCX5     | KCNG1    | CALM3      |
| OR52E6     | GPS2     | NCOA5      |

|          |          |            |
|----------|----------|------------|
| ERI2     | CELA2B   | FAM45A     |
| CCDC77   | PPFIBP1  | ZBTB46     |
| TP53I3   | RAB3B    | KCNE2      |
| TPR      | MRPL30   | DNAJC18    |
| ZNF335   | C5orf30  | PRRC2A     |
| CLPS     | ZBTB7A   | RNASEH2A   |
| AFMID    | PDCD6    | CRCP       |
| GPT2     | CDCA4    | AKAP5      |
| PEX5L    | ODF3L2   | POT1       |
| UBA1     | GPC6     | FBXO34     |
| CHD3     | DUSP7    | FBXO34     |
| TFCP2L1  | NT5DC2   | 43350      |
| WDR59    | CLEC11A  | ZW10       |
| ZDHHC24  | CTNNAL1  | SLK        |
| TTLL1    | SGMS1    | C12orf23   |
| LRRC26   | C20orf24 | IL17RE     |
| HESX1    | FAM65A   | CIRH1A     |
| NPEPL1   | KLHL21   | SLC35E4    |
| DUS1L    | UBA2     | HNRNPF     |
| SAMD3    | EPHA6    | CAPRIN1    |
| OPRM1    | KANK2    | ZDHHC8     |
| PRPF6    | HIVEP2   | SSU72      |
| CCDC93   | AL928654 | PHF23      |
| PRKRIP1  | C5orf24  | MSN        |
| GOLGA6D  | IRAK1    | RBL1       |
| TMEM132A | WDR82    | ZNF501     |
| MAG11    | CYCS     | STARD6     |
| AKAP3    | ZCCHC7   | SLC2A11    |
| COMMD4   | FRMPD4   | AFAP1      |
| TUBA3E   | SACS     | HOMER3     |
| SUOX     | TAOK3    | WWC2       |
| EIF3D    | FANCB    | CD59       |
| AADA4L4  | 04-Mar   | UBE2R2     |
| NEMF     | C2orf16  | URM1       |
| IGHMBP2  | SNX5     | NES        |
| ZIC1     | CMTM7    | ZNF296     |
| SEPHS2   | TMEM151  | ZER1       |
| PSG8     | FLNA     | PTTG1      |
| AKAP9    | CD109    | GADD45GIP1 |
| TRPM2    | SIRT4    | SGCB       |
| HOXB2    | MUTED    | FARSA      |
| BRWD1    | FNDC8    | USP17L4    |
| MR1      | MAFA     | S100A10    |
| SPDYC    | RPL38    | STX2       |
| NUDT16   | ROMO1    | HIGD1A     |
| C1orf9   | PIP4K2A  | ZNF555     |
| ZNF589   | SLC9A8   | FAM98C     |
| MAGED2   | ZNF98    | TIMM22     |
| USP24    | TEAD1    | CYB5R2     |
| TRIM11   | C3orf67  | CHD5       |

|           |          |          |
|-----------|----------|----------|
| SLC10A5   | COX6C    | POLR3A   |
| FGD4      | CHEK2    | BCL2L2   |
| DNAJC27   | MAD2L1   | PDCD2    |
| UBR3      | P2RX3    | MPL      |
| DCAF6     | ZNF114   | ACOT8    |
| PNPLA3    | HIST2H3A | SENP2    |
| LRIF1     | GRWD1    | C8orf85  |
| LYG2      | INCA1    | DHRS4    |
| ZNF808    | POLK     | TKT      |
| LY75      | CENPQ    | HNRNPL   |
| AMACR     | MXRA7    | UQCC     |
| FKBP3     | MED15    | GPR32    |
| DYRK4     | ASNSD1   | WIZ      |
| C16orf80  | METTLL6  | FOSL2    |
| KIAA1147  | NDUFB5   | NSA2     |
| C21orf33  | C5orf28  | LARP1B   |
| SLC24A6   | PDCL     | ZNF829   |
| KRT8      | ARPC5L   | NICN1    |
| MED8      | C19orf29 | TFDP1    |
| TARS2     | CEP55    | BTBD11   |
| EDC4      | SHMT1    | HSPA4L   |
| STOX2     | MRPS6    | TMEFF2   |
| SLC27A6   | RPS11    | PDS5B    |
| C1orf51   | FCRLB    | EPN2     |
| KIAA1731  | FOXK2    | CASP5    |
| PFAS      | ORC5     | C16orf11 |
| WI2-2994D | ELMOD2   | ASNSD1   |
| MYBL2     | TOP3A    | DNAJC25  |
| TFAP2C    | FAM116A  | PPFIBP1  |
| MIF4GD    | HYAL3    | SMG6     |
| SCAND1    | CKAP4    | PCOLCE   |
| RFWD2     | CCDC90B  | CDKN2C   |
| HADHA     | SENP2    | STXBP5   |
| NGRN      | CHCHD8   | FBXO33   |
| COPB2     | BCAT1    | BCAP29   |
| ARFGAP1   | UGCG     | VWDE     |
| RASGEF1B  | ZNF829   | FBXO22   |
| LCMT2     | CHAF1A   | PITPNM1  |
| DYNC1H1   | SPHAR    | HCN2     |
| ILDR1     | AP005814 | TWISTNB  |
| DOCK10    | C9orf80  | USP11    |
| PPME1     | CHD5     | GAS2L1   |
| FLVCR1    | CNPPD1   | GAS2L3   |
| STK11IP   | AC026271 | FADS1    |
| MCCC1     | NCOR2    | SF3B5    |
| BCLAF1    | TIMM23B  | XAGE1A   |
| GUCY2F    | CREB3    | RECQL4   |
| PGS1      | ASB1     | ACY1     |
| ABCF3     | ZNF460   | EIF1B    |
| DIDO1     | CDKN2C   | KEAP1    |

|             |          |          |
|-------------|----------|----------|
| BRF1        | CNOT3    | TRIM74   |
| ESPN        | FAM168B  | POM121   |
| ZNF616      | CRTC2    | TPD52L1  |
| MASP1       | NDUFA11  | ASAP2    |
| ERC2        | CCDC85C  | DTX3L    |
| RSPH3       | VCPIP1   | PIN4     |
| GANC        | TMEM44   | FTL      |
| DCAF4L2     | PPP1R27  | PIGO     |
| PIK3R3      | VKORC1L1 | RRAS2    |
| ACAT2       | SLMO2    | ZNF699   |
| SLC17A8     | SLC25A43 | SMN2     |
| BRWD3       | CCDC63   | ZDHHC14  |
| FRYL        | PITHD1   | KIAA0226 |
| CUL1        | CCDC86   | LRRC8E   |
| ZNF512B     | CTRB2    | NRM      |
| MAU2        | ZC3H4    | KNTC1    |
| GFOD2       | KLRD1    | RASSF8   |
| NFXL1       | DOM3Z    | SLC38A5  |
| SASS6       | TRPV3    | SEZ6L2   |
| P4HB        | GLUD1    | NDOR1    |
| ATP9A       | C11orf57 | USP7     |
| GGT6        | PQLC1    | CDV3     |
| MRPL35      | ISYNA1   | EIF2B1   |
| SSX7        | APOOL    | KIF18A   |
| IKBKAP      | REXO2    | COBRA1   |
| C14orf80    | EGFL8    | OR2H2    |
| ZNF138      | HNRNPL   | ACYP1    |
| PIRT        | RRS1     | ENO1     |
| VPS54       | LYPD5    | NUTF2    |
| PIGC        | TOMM20   | DNAJC8   |
| NT5C1B-RD   | DNAJC1   | MAP1B    |
| RFPL4A      | SMC1B    | CCBE1    |
| ZNF530      | TAPBP    | GART     |
| MORF4L2     | SENP1    | C19orf33 |
| HIBCH       | NPTX2    | FAM210A  |
| PPP1R9A     | C19orf38 | HDGFL1   |
| RBFOX3      | COBRA1   | PDE1C    |
| PUM2        | MRPL2    | DNAAF2   |
| WDR27       | ESPNL    | CDKN2B   |
| TMEM141     | LMAN1    | SPDYE4   |
| ACADS       | C10orf88 | ETV6     |
| GLUD2       | C5orf39  | XKR9     |
| RP11-1286f1 | MAX      | PTPRG    |
| TMEM160     | GATAD2A  | PRIMA1   |
| TAS2R19     | PIAS4    | SLMO2    |
| DHX38       | RAB7A    | PRX      |
| CHDH        | QRFPR    | DNAJA3   |
| C11orf93    | PCDHGB6  | KLHL24   |
| DLD         | DBNDD2   | PSMB9    |
| RBBP7       | PITPNB   | DPH2     |



|            |          |                |
|------------|----------|----------------|
| HAL        | C3orf23  | TIGD7          |
| MFSD3      | HK1      | C14orf135      |
| BIN1       | SLC38A1  | CUL4A          |
| PDIA6      | NUP43    | AIG1           |
| CCR8       | WDR46    | ROBO4          |
| TTC27      | CRY1     | SLC16A8        |
| ZNF304     | METTL15  | CADM3          |
| SERPINB6   | RAB10    | NUP153         |
| RPS6KB2    | ARPC2    | RP11-526L8.1.1 |
| C12orf56   | TMEM126  | C11orf46       |
| ZMYM3      | WWTR1    | MXRA8          |
| G6PD       | PAPD7    | LZTFL1         |
| LANCL2     | CHM      | CNOT4          |
| SHCBP1L    | RHOC     | HAUS5          |
| LPGAT1     | CXorf56  | SPC25          |
| CXorf40A   | SF3B2    | SNN            |
| SPATA12    | ZNF345   | DCDC2C         |
| PPM1H      | FAM199X  | APEX2          |
| WDR61      | CTDNEP1  | HNRNPAB        |
| WDR61      | FBXL18   | BAX            |
| YWHAB      | NUDT2    | AKNAD1         |
| ANKS1B     | ZBTB11   | EMP3           |
| TMPRSS3    | IRX4     | NTSR1          |
| RP11-10211 | QKI      | POP7           |
| ZNF75A     | SUV39H2  | ALG10B         |
| FMO3       | PLAC8L1  | SLC35B4        |
| LRRC14B    | IFITM5   | RPL37          |
| CDCA7L     | FAM134A  | CLIP1          |
| LRRC37A    | CDS2     | FAM175B        |
| ZNF256     | IL17RA   | INS            |
| FAM136A    | SOX15    | CHEK1          |
| ZNF562     | SGTA     | SLC37A2        |
| BRAT1      | ZNF99    | NFIX           |
| MNAT1      | BCKDHB   | ACD            |
| NT5DC1     | UBXN8    | KCNIP3         |
| EFNA4      | FSTL1    | C7orf60        |
| LGI1       | PRDM13   | RSPO4          |
| GOLGA8B    | RPS25    | PPIF           |
| ZNF189     | MAEA     | ANKRD13C       |
| C22orf46   | USP42    | CLMP           |
| PFKL       | ISM2     | DHX30          |
| ZNF620     | NAA35    | CKAP2L         |
| PRAMEF6    | PTDSS1   | PRR11          |
| C15orf62   | BCL2L2   | PPP1R2         |
| IGSF5      | COX7A2L  | BCKDK          |
| SLC25A12   | SEC24C   | IKZF5          |
| FAM151A    | DUSP1    | HIST1H2BN      |
| TNP2       | HIST1H4J | RPRML          |
| THNSL2     | CBWD3    | EFEMP2         |
| PSAP       | PCDHB14  | TMEM132B       |

|          |          |          |
|----------|----------|----------|
| COLQ     | HIST2H2B | GRWD1    |
| TTC31    | MPL      | ADSS     |
| C6orf226 | KLC2     | RPF2     |
| NDUFB2   | HCN1     | CDC42EP2 |
| PNP      | MME      | GNG10    |
| AC010336 | RPL26    | FLG      |
| L3MBTL2  | ATG9A    | MEPCE    |
| SUV420H2 | ITGB3    | TUBB3    |
| ZNF534   | ADSS     | RANBP1   |
| SLC29A2  | SPATA5   | C5orf60  |
| MYL6B    | SPDYE4   | RASSF1   |
| FAM90A1  | NAMPT    | TTC23L   |
| ATP12A   | PSMD6    | FHL3     |
| RPS6KC1  | C17orf81 | KIAA1644 |
| C17orf90 | RPS10    | C19orf38 |
| SSB      | RPRML    | C18orf26 |
| TFF2     | TAF1A    | LCNL1    |
| LGALS8   | PAOX     | PTBP1    |
| ECEL1    | AP1S2    | SLC16A3  |
| PFKP     | SIRT1    | KHDC1    |
| DNASE1L1 | UBA52    | MED30    |
| DIS3L    | KIAA0020 | C8orf44  |
| COPG     | HNRNPA3  | CGREF1   |
| SLC38A7  | KIRREL2  | NCOR2    |
| TRMU     | IL1RAP   | FOXK2    |
| OR2W3    | IL1RAP   | PML      |
| RBM17    | PES1     | CSE1L    |
| PPP2R5C  | KRBA2    | FAM120A  |
| PROM1    | NT5E     | FAM92A1  |
| ACTR3B   | SCARF2   | KLF17    |
| CREG2    | SHB      | RAB7A    |
| CDH26    | OLFML3   | LETMD1   |
| ALDH9A1  | GALNT2   | MRPL36   |
| AC026150 | PCDHGA6  | GANAB    |
| GTF3C3   | GPR153   | ZNF490   |
| ZBTB37   | PCDHGA1  | TMED1    |
| ACTR8    | HIST2H2A | FAM133A  |
| MGAT5    | PHC3     | LACTB    |
| SHISA9   | ERI1     | KCTD5    |
| EEPD1    | TIMM8A   | DUSP15   |
| MOGAT3   | TSC22D2  | RBMX     |
| SUN1     | SIGLEC11 | BCAS4    |
| SLC25A13 | MATN4    | CCDC36   |
| LRP2     | GPX5     | YAP1     |
| LRP5     | FNDC3B   | PPPDE1   |
| ITFG3    | P2RX6    | NDEL1    |
| KCNT1    | PTBP1    | PWP1     |
| ATG16L1  | DEFB118  | SP3      |
| KIAA0753 | MAN1B1   | NGLY1    |
| HDAC6    | MAD2L2   | HUS1B    |

|            |          |          |
|------------|----------|----------|
| KATNA1     | CTF1     | TMEM14C  |
| ADAMTS19   | RPL15    | INTS6    |
| PNKD       | WDR55    | HIRA     |
| KRT83      | SGOL2    | EPC2     |
| DDIT3      | ARHGAP3  | MAPK1    |
| MC4R       | C8orf59  | PSMB6    |
| CLK2       | FAM206A  | HMGA2    |
| MKRN3      | TFR2     | YJEFN3   |
| CDH8       | C9orf69  | TNPO2    |
| PSMC1      | OR10AD1  | ZFAND3   |
| MAZ        | C12orf76 | PUF60    |
| DOPEY1     | UBE2B    | FEM1A    |
| FOS        | FSTL3    | ZNF581   |
| PDIA2      | CWF19L1  | DEPDC1   |
| TTC5       | SLC44A2  | NUP37    |
| CLDN3      | NOG      | AGPS     |
| EIF2B4     | SNRNP40  | SRP19    |
| RP11-15K19 | ANKRD62  | GAS6     |
| PAX2       | ZNF296   | VTA1     |
| CHST4      | GAS6     | BTF3     |
| SLC27A2    | CCDC51   | SLC31A2  |
| RFX3       | GTF2E1   | MACROD2  |
| SUCLG2     | AOC2     | MRPS16   |
| SH2D6      | PNPLA6   | ACVR1C   |
| CHCHD6     | RAD1     | IGFBP1   |
| FH         | NES      | OR10AD1  |
| DACH2      | CTC-260F | NDST3    |
| SUGP2      | ORAI3    | C9orf167 |
| SEMA6C     | NCOA3    | XPO6     |
| MAGEB17    | PLAUR    | SYT14    |
| OVOL2      | UBE2W    | TMEM194A |
| BEX2       | NRF1     | ALKBH5   |
| CCDC142    | UBXN7    | SLC39A14 |
| CLEC18B    | SIX5     | SLC35A2  |
| PRTG       | PLSCR3   | DYNLRB1  |
| SERPINI1   | PTS      | WDFY1    |
| BCAS2      | MPDU1    | PRELID1  |
| ZNF280A    | SDHD     | RPL35A   |
| ULBP3      | E2F4     | ELFN1    |
| LGALS9C    | WDR74    | ATRIP    |
| TAT        | UBE2S    | GALNS    |
| CCNL1      | ANXA2    | TCP11L1  |
| HLTF       | LRRC42   | SPTY2D1  |
| GTPBP5     | ATP5J2   | SRRM1    |
| ADRBK1     | FBXW5    | SIK3     |
| ALOX12B    | MMP21    | RRAGA    |
| DHX35      | RIN2     | DGKZ     |
| MOGS       | CA13     | CKS1B    |
| ZNF626     | FAM122A  | PTF1A    |
| ZNF93      | ENHO     | GPR173   |

|           |          |          |
|-----------|----------|----------|
| TSC1      | C16orf52 | SRCRB4D  |
| TRIM58    | NOXRED1  | TIGD5    |
| STAT2     | BRPF1    | NECAB1   |
| MTL5      | GJA9     | ING5     |
| MYB       | PABPC1   | PPTC7    |
| ACOT11    | IFRD1    | RAD23B   |
| ALG1L     | COPS3    | ZCCHC2   |
| KAAG1     | C18orf42 | PRSS42   |
| KCNH5     | HTR1D    | TMEM64   |
| SUCLG1    | PPP2CB   | SFR1     |
| DMRT2     | OR5C1    | 43164    |
| HTR3E     | AVP11    | XAGE1B   |
| IFITM1    | FBXO36   | SNX5     |
| KRTAP10-5 | HUS1B    | YBX2     |
| FASN      | TMEM201  | PSMD2    |
| HOXB9     | SRGAP2P1 | TRIM47   |
| MTX1      | UBE2V2   | ISL2     |
| SULT4A1   | TMEM192  | XAB2     |
| C20orf11  | AP3D1    | MECP2    |
| MDM2      | TLR9     | LNP1     |
| LRP1B     | GRAMD1E  | PRKACA   |
| ELL3      | RAP2A    | NCOR1    |
| LAP3      | ADRA1D   | APEH     |
| PRAMEF9   | TCOF1    | EPN1     |
| MARVELD3  | C9orf167 | CNOT3    |
| CSAG1     | FBXO43   | SLC35F2  |
| KLHDC3    | SPINK9   | SMYD4    |
| CACNA1A   | ACOT7    | SNRPB2   |
| TTC36     | CYTH3    | MAML1    |
| HSPA5     | LARP6    | TRMT112  |
| FOXI1     | COQ10B   | SDF4     |
| TREX2     | C12orf65 | CCT2     |
| SWT1      | UBXN1    | CHFR     |
| PAQR9     | CAPRIN1  | SLC25A36 |
| PLEKHG6   | ARL9     | RASIP1   |
| HOXB3     | ZNF570   | REXO2    |
| FAM123A   | TOMM70   | NOP16    |
| MSTN      | DYNLRB1  | APOA5    |
| DDX1      | INPP1    | PAK1     |
| OR4N2     | SRRM1    | ATL3     |
| TMX2-CTN  | CLIP3    | GNA11    |
| MAGEA12   | NAA15    | PCDHGA1  |
| CES3      | GPR143   | HDAC7    |
| AC012414. | MEFV     | MAPK14   |
| POTEB     | TOMM22   | NXN      |
| CDY1      | NELF     | AFF4     |
| DEFB131   | IRGQ     | ZNF347   |
| IFNW1     | COX10    | PCBP1    |
| OR2T12    | KDELRL1  | C6orf89  |
| CDY1B     | METTL21E | RPS6KA4  |

|            |          |           |
|------------|----------|-----------|
| GSX2       | TUBB3    | TEX2      |
| TMEM30C    | PPIF     | GPS2      |
| OR8J3      | ATXN2L   | C14orf178 |
| OR10H5     | OGFRL1   | BRPF3     |
| WI2-3308P  | KCMF1    | PRDM11    |
| SYCN       | RBMX     | HRNR      |
| OR2T8      | HCFC1R1  | CCDC90B   |
| XIRP2      | KIAA1958 | USP4      |
| OR14A16    | CENPB    | TRAIP     |
| KRTAP19-7  | CHEK1    | PCBP2     |
| OR2A5      | PITPNM1  | TMEM239   |
| OR2Y1      | MED6     | C1QBP     |
| OPCML      | PCDHGC3  | POLDIP3   |
| OPCML      | FOXE3    | FAM165B   |
| LCE5A      | FAM108B  | SUMF1     |
| KRTAP20-2  | ELK1     | STK10     |
| LACRT      | ORC2     | PCNP      |
| MAS1       | PRKRA    | MED9      |
| PRY        | TMEM102  | FAM196A   |
| MRGPRX4    | CHCHD3   | SARS2     |
| AC018682.f | NOA1     | ME2       |
| TAS2R42    | ACTR1A   | RPP30     |
| CTD-2313N  | WSB2     | FANCB     |
| GLRA4      | DIRAS1   | GNE       |
| KRTAP19-3  | SMG6     | NME1      |
| KRTAP19-5  | SSBP1    | YIPF6     |
| RP11-58C2  | NCBP1    | MMS22L    |
| APCS       | TRIM52   | RASA3     |
| OR4K2      | GIT2     | ZFAND1    |
| LIPF       | RPA2     | ZNF300    |
| PRY2       | UBE2D1   | FBXO28    |
| INS-IGF2   | GTF2IRD1 | CCDC117   |
| GPR128     | CDKN2B   | PABPC1    |
| NOX3       | MRPS22   | ZYX       |
| HTN1       | RAPGEF1  | TRA2B     |
| GRPR       | GUCA1C   | LDOC1     |
| AMELY      | NETO2    | FJX1      |
| ZNF776     | VDAC1    | SLC20A1   |
| KIAA1024L  | SLC16A1  | MRPS27    |
| CDK3       | ELOVL3   | CAMK1     |
| GCDH       | UNC119B  | ACCN4     |
| FAM134B    | UTP11L   | TCF3      |
| TYW5       | KIAA0907 | SLC36A4   |
| MAP3K4     | KIAA1033 | UBN1      |
| GNPTAB     | TMEM5    | FNDC8     |
| FRG1       | CLIP1    | CTRB2     |
| OLFM3      | ALKBH5   | SS18L2    |
| TEX101     | CDK4     | HIST3H2BB |
| CDX4       | RUSC2    | TIAL1     |
| RSAD1      | GTPBP8   | GTF2H2    |

|            |           |            |
|------------|-----------|------------|
| CDH22      | DPY19L1   | DHFRL1     |
| C8orf74    | SMS       | HCFC1R1    |
| ZSCAN2     | CRCP      | CYP51A1    |
| ARHGEF11   | ZFYVE16   | SRSF3      |
| TXNRD3     | CREM      | F12        |
| MYBPC1     | SLC10A3   | C18orf42   |
| AZGP1      | TIGD5     | ADAM17     |
| KRTAP5-7   | TUSC1     | ZNF98      |
| DIRAS3     | SMAGP     | NDST1      |
| CCDC70     | TATDN2    | NDST1      |
| CYP4F2     | RNF150    | B3GALNT1   |
| PRL        | C11orf73  | GIN54      |
| CCT3       | HUS1      | FOXE3      |
| NOL12      | CLCN1     | MAP2K2     |
| HSFY1      | TMEM135   | FASN       |
| STOML2     | POLR2J2   | NUDT2      |
| RP11-1000I | ZNF169    | GDPD4      |
| TPRA1      | KIAA0355  | NSUN3      |
| CSTF1      | HPDL      | SUDS3      |
| FAM32A     | SEZ6L2    | TP53       |
| METTTL7B   | CREB1     | SF3A1      |
| TRAF3IP1   | MT1P2.1   | SMN1       |
| PXMP4      | POT1      | TRAPPC2P1  |
| TRIP11     | KLHL7     | F3         |
| ETFA       | S100A10   | AL050321.1 |
| ABCB9      | TRPC3     | RRP7A      |
| RALGAPB    | SERINC3   | CDCA5      |
| WDR18      | RIF1      | RNF4       |
| DCTN1      | RPL30     | SP7        |
| TIAM1      | ZNF526    | C11orf58   |
| ULK3       | COMMD6    | ITGA2B     |
| ASCL2      | ZBTB9     | PGAM1      |
| MRPL16     | MRPL4     | ZDHHC15    |
| BHLHA9     | CCNY      | BBS10      |
| CENPE      | HRASLS    | USP36      |
| EIF4E2     | TEX261    | GOLGA6C    |
| TAF7       | RBM14     | DNAJC1     |
| PLEKHG1    | SAP30L    | PARL       |
| C2orf44    | TARS      | NEK4       |
| IQCJ       | C20orf117 | MLH1       |
| PDIA4      | UCHL3     | ZNF7       |
| ILKAP      | DTX3L     | MTX3       |
| FMN1       | ENO3      | BET1       |
| PGM3       | CALM3     | HMGN1      |
| BCAS3      | RASIP1    | RAI1       |
| ADSL       | TRIM47    | MAP6D1     |
| AP3B2      | RAB1B     | GNAL       |
| KCTD1      | AL050321  | TUSC1      |
| KRTAP5-4   | VDAC3     | ZC3H12B    |
| VPS39      | ZNF492    | LBX2       |

|            |          |            |
|------------|----------|------------|
| MFSD9      | C9orf64  | FSCN3      |
| ACTR1B     | ZNF529   | SETD5      |
| HOXC9      | NHEJ1    | PROS1      |
| RP11-108O  | HIST1H3D | HIGD2A     |
| GLRA3      | KCTD5    | RSPH6A     |
| GLRA3      | ALG3     | U2SURP     |
| DNAH14     | CLN5     | DPP9       |
| CPSF4L     | SLC25A37 | MARK4      |
| CCDC115    | SMAD4    | CSTF2T     |
| GALR3      | MMS22L   | TTC39A     |
| NR4A2      | PTDSS2   | ST20       |
| NEU3       | FNIP1    | RAVER1     |
| SUPT3H     | HIST1H2B | RUSC2      |
| CCDC88C    | AP3M1    | AP1B1      |
| GPS1       | AGPAT3   | CYHR1      |
| KDM3A      | AGPAT3   | GOLGA2     |
| POU5F1B    | PLAA     | SMC3       |
| RBM38      | EIF1AX   | COQ3       |
| CAMP       | C1orf85  | PRLR       |
| DDO        | PSMB7    | ZNF528     |
| TMEM106C   | C14orf13 | RAD21L1    |
| APOBEC1    | DNAAF2   | ELMO2      |
| HSFX1      | UBQLN2   | RAX        |
| OR2A1      | ZFP64    | QSOX2      |
| SLC4A1AP   | MYADM    | RACGAP1    |
| ELOVL6     | PYCARD   | FAM83D     |
| SHC4       | FAM131A  | ZFP91-CNTF |
| KRTAP5-11  | ANO10    | MICAL3     |
| ZNF134     | DPP9     | PSMD12     |
| AZI1       | FAM24B   | RAB6C      |
| SDR42E1    | EIF1AD   | RB1CC1     |
| LRPPRC     | YWHAQ    | PELI3      |
| IST1       | ABHD14B  | PRSS33     |
| NOM1       | RPS16    | DMRTA1     |
| CENPBD1    | C11orf24 | CDYL       |
| C1orf172   | MECP2    | GSK3B      |
| AHCY       | PRX      | WDR92      |
| ISY1-RAB43 | DNAJC9   | RPP25      |
| ZZEF1      | AKNAD1   | CELA2B     |
| EXD2       | C9orf123 | MRPS6      |
| L3MBTL4    | CUL2     | KRR1       |
| FAM133B    | PRDM11   | PCNXL3     |
| TRPM5      | DDA1     | CCL8       |
| DNAJA4     | TCTE3    | DGCR14     |
| ALX3       | EIF3G    | SMCR7      |
| POTEC      | NUS1     | CERCAM     |
| RGPD8      | TTC24    | TIGD1L2    |
| SORT1      | TGFB111  | WDR62      |
| VPS41      | CAMSAP1  | AIDA       |
| ZBTB41     | CDYL     | INCENP     |

|           |           |                 |
|-----------|-----------|-----------------|
| GORAB     | TRAF2     | ANAPC10         |
| GOT1      | LYAR      | RPL35           |
| GABRG2    | HNRNPUL   | NCEH1           |
| FAM195B   | ZNF527    | FKBP10          |
| SLC41A3   | THAP4     | VDAC3           |
| WDR4      | RPLP0     | COMMD2          |
| PCGF1     | NR3C1     | PFKFB3          |
| AGAP1     | STARD3N   | ICREB1          |
| GRID2IP   | MAPKAPK   | RP11-613M10.9.1 |
| MUDENG    | ZFP37     | HECW1           |
| RNF25     | TLN1      | YWHAQ           |
| CTD-26110 | DRD4      | CLPB            |
| KRTAP5-3  | SIK3      | STRN3           |
| TRIM15    | CEP76     | C16orf72        |
| MORC2     | PIGU      | ERGIC2          |
| PPP1R26   | CNOT7     | RPL15           |
| MAP7      | NDUFA6    | RBFOX2          |
| MUC20     | RP11-603. | MRPS10          |
| SLC30A9   | STK11     | DRD4            |
| HMX2      | G3BP1     | CHEK2           |
| GNA14     | CEP41     | EIF3H           |
| UCK2      | SLC1A3    | PQLC1           |
| NFS1      | TONSL     | SETP18          |
| LGALS9B   | PCBP1     | ITGB3           |
| ZKSCAN4   | RGS10     | TMSB10          |
| CDKAL1    | RRP7A     | GORASP2         |
| IMP4      | ELF4      | TMEM86B         |
| WWOX      | CHFR      | PTPN20A         |
| BSPRY     | VASP      | F2R             |
| CBWD1     | 07-Sep    | HHIPL2          |
| MEAF6     | C13orf33  | CHCHD2          |
| AQR       | ZFYVE20   | FSCN2           |
| TMTC2     | FBXO28    | GOS2            |
| HMG5      | HDAC7     | HCN1            |
| LRBA      | ZNF383    | RAB21           |
| MOAP1     | TANK      | DUS3L           |
| PREB      | ROR1      | PTAR1           |
| USP33     | SLC3A2    | DSG2            |
| NASP      | C2CD4C    | REST            |
| RECQL5    | PRPSAP2   | RNF150          |
| PEX16     | VCL       | MRPL13          |
| KIAA0895  | SNRPF     | ZCCHC9          |
| FAM19A4   | PRELID1   | SKA3            |
| URB2      | NAB1      | PHLDB3          |
| HMGB1     | CCDC42    | HIST1H4C        |
| PRR5-ARHG | ZNF789    | OR5P3           |
| ODF2      | C18orf26  | RBAK            |
| SNRPA1    | TMEM41E   | KCNG1           |
| TMEM87A   | BTBD2     | BOLA3           |
| OS9       | AKT2      | WDR45           |



|         |          |               |
|---------|----------|---------------|
| ERCC3   | C8orf85  | CHURC1        |
| MARS    | PDE1C    | LSM12         |
| CHMP4C  | BCCIP    | MAST1         |
| GDF11   | SEC13    | WDR70         |
| NADK    | SERPINH1 | NME4          |
| GLA     | ZDHHC2   | NCBP1         |
| SLC28A1 | FOSL2    | COPS3         |
| ZNF396  | FAM82B   | TMEM209       |
| ACAD9   | SMOX     | MEFV          |
| NGDN    | RASSF1   | FKBP1A        |
| USP21   | NME1     | CBFA2T2       |
| COPA    | PPPDE1   | TSC22D2       |
| PLXNB1  | USP17L4  | DCLRE1B       |
| IL4I1   | EIF4H    | EXOSC4        |
| PLSCR2  | SCRN1    | ORAI3         |
| SMPD4   | TGFBR1   | AFF3          |
| CCDC120 | NBEAL1   | C8orf46       |
| IARS2   | ZNF354C  | CD70          |
| SLC25A4 | NLRP9    | CA12          |
| RAB40B  | WIPF2    | COPS6         |
| HEATR6  | XAGE1A   | C9orf123      |
| ZNF434  | KPNA3    | DNAJC25-GNG10 |
| CDC25C  | DIMT1    | PACSIN3       |
| XRCC6   | CHERP    | TEAD1         |
| SORD    | INTS6    | EXOSC5        |
| NDUFS1  | BAX      | ECD           |
| BSND    | WFDC8    | ZCCHC7        |
| PAXIP1  | SUDS3    | ACAN          |
| TRIP4   | PPP1R11  | NAMPT         |
| GGT7    | VTA1     | SLC2A8        |
| RCCD1   | SRMS     | DNAJB5        |
| CCDC14  | SF3A2    | NBEAL1        |
| CASZ1   | HIST2H3D | FAM208A       |
| NMNAT3  | RAD23A   | LARP6         |
| PCDHGA1 | PRDM8    | RNF2          |
| KISS1R  | TCF7L2   | LAMP1         |
| SPIN2B  | SARS2    | SGK196.1      |
| CLDN8   | CYP51A1  | MMGT1         |
| IGSF8   | FSCN2    | C1orf144      |
| ZFYVE26 | TUBG1    | SH3BGR13      |
| PRPF4B  | IAH1     | MAMLD1        |
| HOXB1   | TM6SF2   | ASAP3         |
| UBA5    | C11orf48 | FKBP1C        |
| RBBP5   | ZNF300   | CCT4          |
| ARID2   | ATG14    | RFNG          |
| WISP3   | PDS5B    | ANKRD33       |
| EYA3    | ZBTB16   | JAGN1         |
| OR10H1  | C7orf11  | SCAMP1        |
| PPIG    | CTU1     | TFAP4         |
| HGS     | MAFF     | NCOA3         |

|           |          |              |
|-----------|----------|--------------|
| SYNJ2     | RPE      | FBRSL1       |
| RCOR3     | IGFBP3   | NUDCD2       |
| SYNE2     | MFSD5    | EXOSC2       |
| SYNE2     | FBXO45   | WDR53        |
| HOXC10    | DNAJC21  | TNIP2        |
| ZNF84     | VAPB     | CEP57        |
| ZNF670    | LPAR2    | PTPN11       |
| LCT       | NHP2L1   | CAMSAP1      |
| STAG2     | PPP1R2   | ABCA1        |
| C6orf222  | ROBO3    | A4GNT        |
| HOXC5     | DDX56    | SLC35B2      |
| NSL1      | SYT6     | RPS18        |
| GPR35     | SLC30A1  | TRIM65       |
| FARSB     | STAT1    | STAM         |
| SOX13     | PIP5K1A  | RAP1GAP2     |
| MLL3      | RSPH6A   | ANLN         |
| CHRNA1    | PRKACA   | C14orf109    |
| STXBP4    | CSRNP2   | YME1L1       |
| CCT6A     | PKM2     | UBE2V2       |
| ADCK2     | C9orf102 | NACC1        |
| PLA2G15   | KIAA0226 | PAK2         |
| ARSH      | NMD3     | CLEC11A      |
| GOLGA8A   | HCRT     | FAHD1        |
| ACTR5     | LRRC40   | SLC6A15      |
| USP28     | NFIC     | CHTF8        |
| RP11-382B | CUL4A    | NUP107       |
| ZNF772    | FAM207A  | MZT1         |
| MVD       | ETF1     | AL928654.7.1 |
| NOTCH3    | CA1      | CDR2L        |
| KIF21A    | FAM151B  | XKR6         |
| TLL4      | EPB41L4A | NAB1         |
| CLDN23    | UBE2I    | HEPACAM      |
| BHLHB9    | LHPP     | L2HGDH       |
| C2CD4D    | EPHB4    | TRAF2        |
| PHF8      | MAPK12   | PAQR4        |
| ERMP1     | PEX14    | GPR3         |
| APEX1     | TRIM32   | PUS1         |
| LRRC8D    | PDZD8    | IPO11        |
| TTF2      | GAS2L3   | MEA1         |
| ZNF549    | RPLP2    | ZNF492       |
| SDHAF2    | OR13J1   | C7orf30      |
| MAP1LC3A  | ZNF791   | RPGRIP1L     |
| PPP1R1A   | NECAP2   | PTDSS1       |
| TRIM10    | RFX1     | C20orf4      |
| OTUB1     | MIR3654  | KRTAP10-2    |
| KIFAP3    | HIRA     | EWSR1        |
| DAAM1     | CXorf69  | NUFIP1       |
| ACSM5     | SETP18   | ZNF333       |
| TMPRSS5   | NAP1L1   | KCTD15       |
| PBX1      | PARS2    | CFL1         |

|          |           |                 |
|----------|-----------|-----------------|
| PBX1     | CSNK1E    | TEAD2           |
| GK5      | DNAJC11   | KCNK13          |
| ATIC     | DPY19L4   | TAF6            |
| TOR3A    | C17orf67  | SNX32           |
| TUBGCP4  | KLF17     | RG9MTD1         |
| PAK6     | INS       | RAP2C           |
| DDX18    | RP11-463  | ZEB1            |
| ZKSCAN1  | SGPP1     | AMFR            |
| APBA2    | STAU1     | ZNF324          |
| SETDB1   | DMKN      | PPIL4           |
| TDRKH    | MRPS10    | EIF2C1          |
| RNF43    | RPL10L    | HTT             |
| SFT2D2   | HOMER1    | TPGS2           |
| CRISP3   | GDI1      | RALB            |
| CEP63    | VHL       | RAD23A          |
| TIMM17A  | MINPP1    | YWHAZ           |
| BCS1L    | FBRSL1    | VWCE            |
| PCNXL2   | UBE2L3    | RP11-540D14.8.1 |
| SEMA4F   | CENPA     | C16orf61        |
| STAMBP   | WAC       | MEX3C           |
| FAM63A   | YJEFN3    | ZC3H3           |
| GPR56    | LSM2      | SRPX            |
| LRPAP1   | ADAMTS1   | PUS7            |
| ITFG2    | MED26     | FAM19A2         |
| NARS2    | CNBP      | C19orf68        |
| RBM41    | ZBTB43    | S100A16         |
| POLR1B   | IL17RE    | MTCP1NB         |
| ACTL10   | CD8A      | CERS1           |
| UBE2L6   | REST      | TUBA4A          |
| GCHFR    | TCTN2     | AC003682.1      |
| ASPM     | ELOVL5    | CRY1            |
| PSMD7    | CHCHD10   | CWC22           |
| DERA     | UBE2A     | DFNB31          |
| VAX2     | CNGB3     | BACE1           |
| TSSC1    | XRCC4     | MRGPRX2         |
| C12orf50 | SLITRK1   | GFOD1           |
| MKS1     | FTH1      | GFOD1           |
| NIT1     | GNAQ      | USP53           |
| TADA1    | RQCD1     | DENND1A         |
| KRBA1    | ANKRD30   | PTS             |
| COIL     | GHITM     | SLC25A38        |
| MRFAP1L1 | ZCCHC6    | BATF3           |
| FAM115A  | FAM9A     | ZCWPW2          |
| OPRK1    | RAB14     | CYP26C1         |
| RAB6B    | C14orf142 | C7orf73         |
| PNN      | PDRG1     | CEP76           |
| ZSWIM3   | PFN2      | C14orf142       |
| VLDLR    | FKBP10    | PARD3           |
| OSBPL2   | RP11-87C  | CDK6            |
| OPTC     | IL5       | MED26           |

|            |           |                 |
|------------|-----------|-----------------|
| MAN2A2     | SUMO1     | OPA1            |
| RP11-831H1 | CLEC18C   | IGF2BP3         |
| AGPAT3     | ELL       | ATF6B           |
| AGPAT3     | CSRNP1    | PPP1R18         |
| PRAME      | MCTS1     | C9orf86         |
| ALS2CR11   | SEC61G    | ASB14           |
| ACACB      | TMEM123   | RBMS3           |
| WDR3       | RALY      | PRKRA           |
| KDM4C      | TSR1      | CTDP1           |
| C14orf133  | FOXJ3     | REP15           |
| C9orf140   | GLIS3     | MRPL32          |
| TSPAN16    | ATP5L     | CLTCL1          |
| ZNHIT6     | POLR2K    | GTF2H2C         |
| SCYL3      | PPARD     | SUB1            |
| ORC4       | ZCCHC14   | ATP13A3         |
| PLEKHB2    | ACTN4     | APOOL           |
| PPP6R3     | CCT5      | HMG20B          |
| CCAR1      | NUDT15    | FAM164A         |
| TRAPPC11   | REP15     | NEIL3           |
| DNM1L      | PRKAG1    | IMPA1           |
| PSME4      | MICAL3    | MKLN1           |
| TIPRL      | IFNG      | C5orf41         |
| HOXC4      | B4GALT2   | ADAMTS17        |
| DEDD       | GOLPH3    | FXR1            |
| C17orf110  | STK25     | RP11-603J24.9.1 |
| DARS2      | BSX       | ZIC2            |
| ZNF3       | TLK1      | PTPDC1          |
| SLC4A3     | TAP1      | UBE2W           |
| C5orf44    | FRMD5     | PTP4A1          |
| DNMT3B     | KIAA1826  | POLR2L          |
| POTEJ      | BCL7A     | ZFP36L1         |
| DIAPH2     | TRIM14    | TUBG1           |
| ZNF496     | FHOD3     | PACRGL          |
| ZMAT2      | UBE2N     | ABHD14B         |
| TSNAX      | NCOA5     | SLC12A5         |
| HES6       | MBLAC2    | PLAC8L1         |
| CPN1       | CDK7      | CCDC120         |
| BAG5       | NSMAF     | IFITM5          |
| TMPRSS11F  | BATF2     | PDCD2L          |
| C1orf115   | PDDC1     | C11orf68        |
| SERF2      | HIST1H4C  | FCRLB           |
| ZNF107     | SRP19     | SACS            |
| RAX2       | CHCHD2    | MPDU1           |
| REPIN1     | GMEB1     | TRUB1           |
| INTS7      | DPF1      | B3GALT1         |
| PCDHA1     | C11orf46  | MPRIP           |
| EDC3       | RAP1GAP1  | RBM3            |
| BUB1       | GAL       | TMEM39A         |
| TBC1D16    | SLC25A3   | ZNF852          |
| PRPF38A    | IQCJ-SCH1 | EHD1            |

|          |          |          |
|----------|----------|----------|
| ITGB8    | NDUFB9   | GAPVD1   |
| MTF2     | POLE4    | MAGEE2   |
| MAP2     | C4orf29  | SLC35E1  |
| PMS2     | WNK3     | TLL1     |
| MKRN1    | TNFRSF1A | MRPL16   |
| ATG4A    | UROS     | ATG14    |
| RPUSD2   | ZNF268   | ACSL3    |
| FAM170B  | CBLB     | COX15    |
| CHMP6    | SPAG11A  | GRAMD1B  |
| MYPOP    | COX7B    | DNAJB2   |
| OBSL1    | ZFP36L1  | C14orf39 |
| SPG11    | RAB3D    | PBRM1    |
| KCNH2    | XPA      | NFIC     |
| ANAPC1   | ENO2     | SENP5    |
| ARID4B   | CDK2     | RALY     |
| MTSS1L   | TIMM50   | MAGOHB   |
| SERPINA4 | TPX2     | HAT1     |
| ZNF45    | ULBP1    | PPP2CA   |
| PEX19    | VSTM4    | PAFAH1B3 |
| ATAD2B   | GPRIN1   | AMDHD2   |
| MPI      | TWISTNB  | OGFRL1   |
| IDH2     | CST7     | FAM171A2 |
| HSPD1    | TMEM161  | TAF1A    |
| XYLT2    | PLOD1    | EFEMP1   |
| ELF5     | PSMD12   | CGGBP1   |
| RWDD2A   | ASAP2    | C5orf39  |
| CHD7     | CGREF1   | H2AFX    |
| KBTBD4   | C5orf45  | TRAF7    |
| NOL10    | UPK3B    | C5orf35  |
| DDX47    | SLC20A1  | PSMG1    |
| GDAP2    | FBXL5    | MT1P2.1  |
| SPRY3    | TAB2     | RAB11B   |
| ANGEL1   | ZHX1-C80 | EIF4G3   |
| KANK1    | CDC37    | RAB6A    |
| GYLTL1B  | FBXO41   | SRGAP2P1 |
| TET3     | BAG6     | LYRM4    |
| FAM82A2  | FUNDC2   | EHD4     |
| TMEM187  | DDX51    | NUCB1    |
| OR2T33   | YPEL1    | MAD2L2   |
| USF1     | ZCCHC24  | TUBA1C   |
| POU2F1   | UBLCP1   | FKBP4    |
| TNRC6C   | AC091153 | WDR78    |
| COG1     | SH2B3    | PSMB7    |
| PDK3     | DNAJA3   | CRTC2    |
| CDAN1    | FAM213B  | FBXO3    |
| KDM4A    | DEPDC1   | CENPP    |
| PSMD14   | NICN1    | TEAD3    |
| APOA1BP  | CDK9     | POLD3    |
| RPAP3    | ACVR1C   | EPO      |
| ATG4D    | MTRF1L   | RNF5     |

|           |          |             |
|-----------|----------|-------------|
| POGK      | USP19    | EOMES       |
| B4GALT3   | GATAD2B  | NSMAF       |
| CLASP1    | FAM89B   | TBCA        |
| UGT2B10   | PABPN1   | TTPAL       |
| KLHL12    | IMPAD1   | U2AF2       |
| CCDC129   | PPP3R1   | KDELR2      |
| SIPA1L1   | SAE1     | TGIF1       |
| DDI1      | ZNF506   | GALNT2      |
| CCDC158   | KRTAP10- | ATP6V1E1    |
| EHF       | BATF3    | ELOVL2      |
| ABCF1     | RP11-111 | RPL36       |
| GALK2     | SCML1    | GDI1        |
| ZNF92     | PRRT2    | NDRG4       |
| KIDINS220 | HMG1     | ARHGAP39    |
| IGSF9     | PSME3    | DPP6        |
| MRPL12    | MMACHC   | BRD2        |
| LGMN      | KCNE2    | EFCAB11     |
| PDIA3     | GNB4     | C5orf45     |
| ATP6V1B1  | LRFN3    | ACVR2B      |
| GLYATL1   | ELAVL2   | C1orf195    |
| TRAK1     | APOA5    | PRR19       |
| AQP12B    | HS3ST3B1 | GNB1        |
| HIP1R     | ST3GAL3  | GPI         |
| ZNF77     | ABI1     | ZNF460      |
| PHKA1     | LNP1     | SUMO4       |
| GPC4      | XAGE1B   | CA5B        |
| EPN3      | TUBA1B   | ZNF665      |
| DNAJC22   | TIAL1    | MAN1B1      |
| DBR1      | CIRH1A   | SLC44A2     |
| NARF      | ZNF430   | SLC39A10    |
| MED12     | HSPA14   | POLRMT      |
| TAS1R2    | RPL27A   | CASP2       |
| PFDN2     | ZNF551   | WDR75       |
| C7orf53   | MIR4720  | PDHB        |
| TAF11     | SMAD2    | SYS1-DBNDD2 |
| C7orf49   | BSG      | PPP2R1A     |
| H2AFY2    | MRGPRX2  | CIB3        |
| EIF4A3    | CENPV    | ATP6AP1L    |
| AADAT     | AP1B1    | ZNF655      |
| POGZ      | FBXO33   | SMC4        |
| PODXL2    | PLCB3    | YEATS4      |
| DHCR7     | RNF10    | CNFN        |
| HERC1     | ZBTB4    | C15orf52    |
| RPTOR     | MACROD2  | RPS10       |
| MKRN2-AS1 | EXOSC5   | CXXC5       |
| HSP90AB1  | AGFG2    | TMEM167A    |
| MTERFD2   | C16orf96 | SMC1B       |
| MESDC2    | C16orf96 | OXTR        |
| SLC5A6    | C16orf96 | BNC1        |
| CACYBP    | LDLR     | AGPAT3      |

|           |          |          |
|-----------|----------|----------|
| ANKRD37   | ERCC1    | AGPAT3   |
| GYG1      | ITGB1    | ARHGEF33 |
| ZSCAN29   | TMEM18E  | PHF16    |
| MID1      | TOMM20C  | C7orf61  |
| KDM5B     | PEX2     | PEX14    |
| C20orf151 | MLLT10   | KIAA2022 |
| ERVW-1    | TAF5     | CLPTM1   |
| MEN1      | PROZ     | 43163    |
| FBXO9     | C19orf53 | GMEB1    |
| NFIA      | FUT11    | THAP1    |
| RRAGB     | OLFM1    | MAD2L1   |
| FAM187B   | CAB39    | GORASP1  |
| TP53BP1   | TADA2B   | PSMB2    |
| SLC6A19   | TBC1D4   | ZNF131   |
| PHF16     | ASS1     | CLIC3    |
| MTMR4     | ZNF461   | ACOT4    |
| ZC3HAV1L  | UBQLN4   | SLC25A5  |
| VRK2      | C19orf57 | MKI67    |
| ZNF749    | NUP37    | BDNF     |
| ZKSCAN3   | RNPS1    | PDZD3    |
| SNX4      | PSMG1    | CDKN1A   |
| EEFSEC    | KCNK12   | C1orf31  |
| TBC1D7    | TRERF1   | C1orf135 |
| NR4A1     | EAF1     | C11orf84 |
| KLHL25    | GNAI1    | CPSF1    |
| PLCXD1    | PFKFB3   | HSPBP1   |
| ARID4A    | AC068533 | C16orf13 |
| NEB       | HEG1     | TMEM102  |
| RSRC2     | FAM45A   | SUV39H1  |
| HOXC11    | C1orf21  | PRSS37   |
| PHLPP2    | DOLPP1   | MYADM    |
| ZNF136    | KHDC1    | RBM27    |
| PSRC1     | RER1     | RPL29    |
| ABCA12    | ABLIM2   | EEA1     |
| METTL3    | NKG7     | LDLR     |
| NCAPD2    | RAC1     | C3orf55  |
| NDUFS2    | ACTB     | GTF2H4   |
| SNUPN     | TIMM21   | TRAK2    |
| USP13     | MASTL    | SNAPC3   |
| ESCO2     | RPL32    | NAF1     |
| SERINC5   | C20orf3  | CYBRD1   |
| CNDP2     | ERP29    | PFDN6    |
| ZNF124    | TMEM20C  | PEX6     |
| FASTKD2   | WDR43    | SLC6A8   |
| HTATSF1   | LPCAT4   | RCC1     |
| C3orf33   | FAM175B  | SIRT6    |
| SNRNP200  | ALX4     | CHRAC1   |
| SLTM      | EWSR1    | CDYL2    |
| GPN1      | TPD52L2  | STMN3    |
| SBK1      | EDEM1    | TPST2    |

|           |          |                 |
|-----------|----------|-----------------|
| GTF3C2    | PRPF19   | HTRA2           |
| CENPM     | GFER     | CASC3           |
| CIAO1     | SPAG4    | PDSS1           |
| SV2C      | ARF3     | EGFL8           |
| C2orf68   | TLL1     | KIAA1958        |
| ATF6      | GLRX5    | TYW3            |
| C10orf113 | A1BG     | TUSC2           |
| PPP2R1B   | ZDHHC20  | ASS1            |
| RAE1      | RFC5     | MTHFD2          |
| HSD11B2   | STK3     | ISG20L2         |
| CAB39L    | MAPKAP1  | TRIM52          |
| LYSMD1    | NXPH1    | THAP8           |
| C15orf23  | ST6GALN/ | ROR1            |
| SNX1      | RPS23    | CTD-2116N17.1.1 |
| KDM1A     | ATP5SL   | LSS             |
| H2AFY     | PLBD2    | SLC39A1         |
| TJP2      | ALG10B   | ARNT            |
| OTOG      | FSD1     | DGKH            |
| ALS2      | XPO6     | C3orf33         |
| NEK2      | IGFBP6   | C9orf64         |
| TTI1      | BNC1     | CDK2            |
| TDG       | TMEM14E  | SLMO1           |
| PUM1      | ANKRD57  | UQCR10          |
| WDR45L    | ZER1     | RUSC1           |
| JARID2    | CTD-3193 | DIAPH1          |
| ZSCAN21   | RAPGEF2  | SCAF11          |
| LMBR1L    | DAPK3    | APOBEC3B        |
| HIPK1     | PRSS23   | DAPK3           |
| ZCCHC12   | RBM27    | C1orf187        |
| MYH2      | C6orf162 | C2orf47         |
| WDR61     | HCFC1    | BTNL8           |
| WDR61     | AP002884 | SPIN3           |
| C1orf105  | ANO7     | TMEM41A         |
| HDAC8     | SHOX2    | IRGQ            |
| IWS1      | PLXNA1   | ABI2            |
| CSTF2     | POLDIP3  | CNNM1           |
| DTNB      | RBM15    | ILF3            |
| UPF3B     | OR5P3    | FXN             |
| MTRNR2L7  | C2orf49  | AC008073.5.1    |
| LEO1      | FRS2     | MRTO4           |
| ACO2      | FBXO30   | TMEM136         |
| VIL1      | RPP14    | UBQLN4          |
| C12orf48  | OPN1SW   | MAP4K2          |
| PRRC2C    | PDSS1    | MLLT10          |
| C6orf223  | CAP2     | COMMD9          |
| ANP32A    | CDCA7    | MAP4K4          |
| UBE2O     | ROR2     | CCDC92          |
| TUFT1     | SLC39A1  | C20orf112       |
| NEDD4     | RAB11B   | GPR150          |
| KLHL20    | SUN2     | DIRAS1          |



|          |           |          |
|----------|-----------|----------|
| ARHGAP11 | PAK2      | AKT3     |
| CLP1     | SLC35B3   | CENPO    |
| RPAIN    | METTL9    | KCMF1    |
| CEP135   | C11orf30  | GARNL3   |
| HOXC6    | AC012652  | FLNB     |
| SLC1A2   | CLSPN     | PLK4     |
| MYLIP    | FEM1C     | ATP5J2   |
| C17orf80 | ATOH7     | TOMM5    |
| CHD4     | YAE1D1    | WTIP     |
| TRIM24   | PITPNA    | PLSCR1   |
| PHIP     | SLC23A3   | FSTL3    |
| C7orf34  | TRIM65    | TEX264   |
| TAF1     | TMEM88E   | C3orf22  |
| YLPM1    | ZNF730    | SHB      |
| SRBD1    | SRD5A1    | CCDC112  |
| SLC25A2  | SHOC2     | RNF135   |
| C15orf44 | CPNE1     | AGPAT6   |
| CENPL    | ECSIT     | B4GALT5  |
| PRPSAP1  | CRBN      | AP3M1    |
| SMUG1    | 03-Mar    | MRPS25   |
| DLGAP1   | SERF1B    | ENO3     |
| CCDC137  | LMBRD2    | PLRG1    |
| PGK2     | RBM18     | FDXACB1  |
| TOMM40L  | NRBP2     | C5orf30  |
| KANSL2   | POLR2L    | PITHD1   |
| RIC8B    | C17orf79  | METTL22  |
| SPTBN2   | RABL3     | PER1     |
| PTPLAD1  | TRIM28    | MRPL41   |
| EGLN3    | CEP97     | SLMAP    |
| ZNF398   | AJUBA     | BSDC1    |
| LNX1     | CD68      | CDK16    |
| SMG8     | SLC35E1   | MRPS12   |
| DIS3L2   | C3orf17   | TCF24    |
| HSP90AA1 | SPATA21   | TGOLN2   |
| COPS7B   | SNX16     | C7orf42  |
| ZNF184   | A4GNT     | FGFR1OP2 |
| NUSAP1   | GSS       | FAM70A   |
| DPP3     | YIPF6     | C3orf39  |
| HBM      | C10orf12E | OSBPL10  |
| CABP4    | BCL3      | CUEDC2   |
| TRMT2B   | HEXIM1    | RAD54L2  |
| NUF2     | HN1L      | SPINK9   |
| STYK1    | ZSCAN5B   | NDUFA6   |
| TFCP2    | NOP16     | FEM1C    |
| C12orf51 | PHF7      | ZFP37    |
| PIF1     | ATP6AP1L  | FUBP1    |
| FAM5B    | RG9MTD1   | CNOT2    |
| NEURL3   | PRTFDC1   | UCHL1    |
| CCNB2    | PRR11     | TAPBP    |
| IVNS1ABP | PXDC1     | PAFAH1B2 |

|          |          |          |
|----------|----------|----------|
| ACPL2    | MRPL50   | GNS      |
| GLYATL2  | C9orf131 | BTBD7    |
| BAZ2B    | APOA2    | LYPD5    |
| MFAP1    | ACD      | UBE3B    |
| AAGAB    | RNGTT    | SMNDC1   |
| DNMT3A   | AURKAIP1 | ANXA7    |
| PRC1     | NOL7     | STK3     |
| ZWILCH   | ATP5E    | TADA2B   |
| JUN      | CHAMP1   | ZC4H2    |
| KIF23    | HAT1     | CHAC2    |
| C1orf112 | ZNF668   | B3GNT9   |
|          | ZNF490   | BORA     |
|          | TTC39A   | ZNF354C  |
|          | CXCL5    | PDHA1    |
|          | CDCA8    | MRPS33   |
|          | C1orf216 | GREB1L   |
|          | AMPH     | ENY2     |
|          | RPF2     | RPN1     |
|          | SSFA2    | TNFRSF9  |
|          | LMOD2    | FNDC3B   |
|          | KCTD15   | ECHS1    |
|          | TERF2    | MYOM3    |
|          | PPAT     | TAOK3    |
|          | CENPP    | C20orf30 |
|          | YTHDF3   | GOLT1B   |
|          | USP7     | 43162    |
|          | STRN3    | FAM116A  |
|          | WBP5     | SPIN4    |
|          | STXBP1   | FAM213B  |
|          | ZNF581   | C11orf82 |
|          | LSM5     | HCFC1    |
|          | MAP1LC3  | PDDC1    |
|          | CLOCK    | NUDT19   |
|          | SPTBN4   | PTDSS2   |
|          | CRTAM    | CMC1     |
|          | SETD1A   | SPTBN4   |
|          | STK4     | C20orf20 |
|          | PROM2    | SSSCA1   |
|          | SRSF3    | ZFP30    |
|          | RAI1     | TCTN2    |
|          | TMEM65   | TMEM126A |
|          | COX7C    | TEX261   |
|          | ZNF408   | PEF1     |
|          | DSG2     | PEBP1    |
|          | ACER1    | CEP89    |
|          | NXT2     | SUV39H2  |
|          | LDOC1    | LAG3     |
|          | YBX2     | SEPHS1   |
|          | AL034548 | TMEM93   |
|          | HBA2     | A1BG     |

C3orf22 ENHO  
TMEM18 MRPS36  
TPP1 HUS1  
CKAP2L RNASEH1  
DHRS4 CDCA3  
HNRNPF TMED7  
GPR180 ZBTB43  
APOBEC3(DDAH2  
ARFIP1 PFKM  
TTC23L C19orf79  
AC078802 LARS2  
PTPMT1 ZSCAN5B  
NSUN2 VASP  
RAB18 CELF1  
CTDP1 CELF1  
AC069368 RPRD1A  
C12orf49 PABPC4  
DGCR2 CALHM3  
TNPO2 SH3BP2  
CAMK2D ZFYVE16  
PRR13 KHDRBS3  
PTPRH ACVR1  
GNS KIFC1  
POLR3A TDP1  
PDZD11 SMG5  
PPID TOP1MT  
PIK3C3 KRT85  
C19orf33 OXSM  
OXTR CYB5B  
C9orf86 C16orf91  
FAM214B PRRX2  
SDF4 MKI67IP  
PRKCDBP SNF8  
C12orf75 EPB41L4A  
EIF5AL1 FANCG  
IMPA1 C20orf96  
C15orf52 ILKAP  
NCEH1 GCSH  
RPS9 CSNK1E  
ZNF639 SYNCRIP  
PPP1R14A ZNF730  
ZNR2 VIM  
TSFM CAMLG  
ATP6V1E1 CCDC154  
B4GALT1 SURF6  
CASP2 PDZD11  
CDKN1C BDP1  
TFDP2 LCTL  
MRPS33 FAM89B  
ATF1 CDC45

|          |                |
|----------|----------------|
| MTG1     | ZNF791         |
| GPR63    | ERBB2IP        |
| BSDC1    | DUSP7          |
| LAG3     | ZNF585B        |
| MDC1     | C3orf17        |
| CDIPT    | SGMS1          |
| C1orf135 | TLN2           |
| FLG2     | TLN2           |
| TMEM194  | BCL7A          |
| MAMLD1   | GTDC1          |
| DNAJB2   | ZNF26          |
| PRKCA    | ZNF428         |
| ZSWIM6   | ZNF668         |
| UBE2G1   | AMZ2           |
| CDK1     | MAFA           |
| AC100775 | BCL2L12        |
| FTL      | TTBK2          |
| MKKS     | ZIC5           |
| C16orf5  | EDIL3          |
| C16orf5  | GPRIN1         |
| ARHGAP1  | TMEM147        |
| ARMC12   | ZNF628         |
| ERCC8    | TSPAN10        |
| GPANK1   | SNX33          |
| CCDC92   | HNRNPM         |
| NGLY1    | ZNF167         |
| KRAS     | CETN3          |
| C8orf46  | RGP1           |
| URI1     | RP11-305M3.3.1 |
| ATP2B3   | RAB4A          |
| CEP57    | C9orf69        |
| ATG13    | FOXO3          |
| TRPA1    | SURF4          |
| PLEKHA3  | MPO            |
| DCAF15   | GSK3A          |
| PRKCI    | SSBP1          |
| KIF20A   | SGTB           |
| ZW10     | C17orf81       |
| WASF2    | EIF2AK4        |
| PPP1R42  | SYDE1          |
| PACS1    | SPCS1          |
| OVOL3    | MYNN           |
| SF3B5    | ARMC12         |
| PTPN11   | CIITA          |
| C19orf68 | ETHE1          |
| SOX18    | RP11-77K12.7.1 |
| RNF114   | EIF2S2         |
| WTIP     | P2RX4          |
| RUSC1    | LZTS2          |
| CCDC80   | MTRR           |

PRKAB1 TLCD2  
NNMT AC068533.7.1  
ATP6AP2 SLC25A37  
TSEN15 ADAM20  
FAM18B1 YAE1D1  
TIMM44 C1orf122  
TRUB2 ERI1  
HTRA2 HERPUD2  
NDUFAB1 ZCCHC6  
RPS2 CYTH3  
FAM19A3 SUSD3  
ATP6V1G:SPPL3.1  
EHD4 ORC3  
KCNK2 FAM49B  
C1QL3 VSIG8  
ABHD10 KIRREL2  
FNBP1 NAT10  
RAB4A GNB4  
MT1F PFKFB4  
CSR2BP FKBP14  
SCOC FAM168B  
ST20 ZYG11A  
NRBP1 LRRIQ3  
SLC36A1 PURA  
RWDD1 RAD54B  
PAFAH1B:PJA2  
CHAC2 TCEB3  
B3GALT CAMK2N1  
ERGIC1 SIM2  
ADNP CFL2  
NANOS1 ZC3H18  
C8orf58 DDX49  
SMC3 KIF15  
LCTL PPP1R8  
SUMO4 OR13J1  
EIF4G1 SLC2A14  
ING5 PLBD2  
HSPA4L C6orf48  
GSPT1 PPP1R42  
MARVELD NCOA6  
BANF1 ATP2B3  
GFOD1 ORC5  
GFOD1 VHL  
TCF3 AIMP2  
TMEM22 VAPB  
AIDA TMX1  
SHARPIN ARMC1  
TGOLN2 CTXN1  
RAB11FIP:DNAJB1  
PPP2R2C C17orf79

LZTFL1 C11orf74  
HNRNPUL SERINC2  
RHOBTB3 KIF5B  
BICC1 KDSR  
TOMM6 NMNAT1  
PPP2CA SGCE  
HBA1 PEX10  
C8orf82 EPHA6  
GDPD4 DDX54  
ZNF140 GBP1  
CETN3 DCTD  
MAP7D1 GPR153  
MAGEE2 HIST2H2AC  
OBFC2B CXorf69  
C12orf66 KCNK3  
RPS6 RLIM  
AMFR CPPED1  
MOB3A ZNF564  
CTSB NAPA  
CXXC5 MAP2K1  
DNAJB4 OBFC2B  
FAM64A SDC4  
UBTD2 AACS  
STRAP EIF2C3  
GALNT10 GPX8  
RFC3 GPR63  
TEAD2 PIGT  
PRPS1 AKIRIN1  
LHFPL2 FBXO36  
CEP89 TRMT1  
M6PR NUP43  
GOS2 RPL14  
AC011498 ICAM4  
C6orf72 RBM15  
HHIPL2 TMEM161B  
FTSJD2 UBAC2  
MRPS17 RAB3B  
C19orf10 CDC23  
DAND5 NDRG3  
CYP26C1 ZNF562  
GULP1 ZNF584  
ZDHHC15 PWWP2B  
CORO2A TRAPPC5  
PTCH1 C2CD4C  
ENTPD7 TMED7-TICAM2  
SLC16A8 CDC123  
IFI27L2 WRNIP1  
FANCG CECR6  
AKIP1 ZNF345  
ANKRD13.SCAF1

MED29 PLK1S1  
COPS6 RPS11  
NIPSNAP1 NXT1  
C6orf89 CPSF2  
CDC25A FAM98A  
C4orf52 GIT2  
C19orf42 NELF  
ATAD3A COL4A3BP  
ACAN CYB5D1  
GAPVD1 HEXIM1  
CASP5 CHURC1-FNTB  
DALRD3 CECR5  
SNX3 PIEZO1  
YRDC AS3MT  
BCAP29 PPHLN1  
GPR3 TNFRSF1A  
CUEDC2 UBAC1  
TROAP LASP1  
ARMC6 HIST1H2BD  
DGCR14 SPAG4  
TSEN34 PPFIA1  
CCDC165 ZNF569  
DUSP15 ZNF251  
BSN CENPQ  
MEIS3 PHC3  
GSR APOBEC3G  
KIAA1704 TARDBP  
ZNF771 SMOX  
TMEM242 CSRP2BP  
CMTM3 NANOS1  
CBFA2T2 EXOC1  
DCTD AURKB  
MANBAL PFAS  
STK24 PANX1  
EFCAB11 C5orf54  
CD244 HDAC4  
NOL8 ECSIT  
RTN4 SLC1A3  
PML THUMPD3  
ACTL6A VSTM1  
PPIL4 STRADB  
ZNF251 C8G  
ITGA2B AXIN1  
KDM2A MBLAC1  
MRPL21 HBS1L  
ALG2 IBSP  
CREB3L1 PSKH1  
GLOD4 FAM82B  
ETV6 NEK1  
AP4S1 RNMTL1

PRKCSH FUNDC2  
HIC1 PFN2  
COX15 MTRF1L  
SMYD4 MEF2BNB-MEF2B  
MFI2 CCK  
ADAM17 HIF1A  
LRRC3C HIF1A  
PTPDC1 C19orf40  
TRMT6 CXorf56  
TCF24 TNPO1  
NECAB2 TRIM14  
LYL1 NTPCR  
OSBPL10 PLOD3  
C9orf46 OCRL  
CLTCL1 RECK  
TBX21 RNPS1  
MFAP3 ARPC5L  
RP11-526|B4GALT2  
ZFAND2B ANKAR  
MMADHC SLC25A3  
EIF6 F8  
GP1BA TMEM55A  
FBXO3 SSRP1  
AC003682 ALYREF  
ST3GAL2 IARS  
MRPS16 ADRM1  
SATB2 SMARCA5  
TOMM34 CD109  
PRKG1 DNM1  
HSPB11 TMCO6  
HIATL2 ANPEP  
SLC9A3 MAP2K7  
PPP2R5B PTPRH  
CHKA RP5-977B1.10.1  
NMNAT1 ZBTB7A  
THOC3 WDR41  
ARMC1 MIDN  
HRNR EP400NL  
TEF ELF4  
CFL1 RBM10  
NEDD8 C9orf80  
CCDC72 SLC13A3  
HM13 TGFBR1  
TRIM56 DCAF4  
S100A16 B3GALNT2  
HELLS THY1  
APEX2 MAPK11  
HHLA3 REEP2  
RPL36A KIF11  
BRPF3 TPM2



C14orf21 MRPL18  
TRIM8 CYB561D2  
JPH2 CD68  
RP11-613| LCN1  
ZMYM1 LRRC59  
MRPL41 AC069368.3.1  
TXNL4A CPSF6  
LRRC47 GIT1  
TGIF1 RAB8B  
USP6 PCDHGA11  
PDCD2L STARD3NL  
EXOSC2 PEG10  
MTCP1NB NNMT  
RPL8 OSBPL6  
INPP5A MASTL  
AASDHPP FAM123B  
USMG5 DPYSL3  
RUVBL1 FRMPD4  
ATP6V1G:ST3GAL2  
TRAM1L1 PSMG4  
EIF3F GALNT10  
TBC1D10/ CCDC66  
OSTM1 SLC35C2  
RB1CC1 RUVBL2  
UQCC FAM24B  
ZRANB1 USP30  
JPH4 PSMC3IP  
GPR126 PINK1  
GIT1 PGK1  
HNRNPH3 RPL7L1  
C3orf37 PROZ  
KIAA2022 CATSPERG  
HIST1H2B CMTM7  
MPV17L2 CDK1  
ZNF70 CDC34  
ORAI2 RNH1  
MOCS3 SERTAD2  
SAV1 PYGO1  
GOLGA2 AP005814.1.1  
UQCR10 MCF2L2  
HIPK3 KLK1  
ANKAR KCTD6  
LTBP4 METTL21B  
C4orf27 SLC25A18  
CDC37L1 URI1  
ZBTB26 MMAA  
CCDC71L CCDC144A  
EIF2B1 LENEPI  
MDGA2 UTP23  
ARNT SHOX2

DIAPH1 RAB2A  
SEC24D UBTF  
TMTC4 ATMIN  
RBPMS2 SFMBT1  
ZNF622 ZNF625.1  
HMHB1 OR5C1  
KHDRBS3 RP11-770G2.3.1  
ZNF665 UGCG  
RC3H2 COQ10B  
FAM127B UBL4A  
PIGO CCDC50  
BTBD3 SPATS2L  
C8G PPP1R37  
SWAP70 DIAPH3  
WWC2 OSGEPL1  
FIP1L1 RP9  
ACTR3 RAB10  
FNDC4 COL20A1  
NCOA6 ZNF768  
GFM1 DNAJC30  
RP1-239B TMEM135  
LATS2 TAF10  
GLRX2 ADRA1D  
ELP4 DHODH  
MEPCE MDGA2  
TRMT112  
SEC24A  
TRAF7  
TMED1  
ZNF131  
SLC6A15  
ACTR2  
LYPLA1  
MRPL36  
ZRANB2  
HOOK3  
RPGRIP1L  
ALYREF  
CERS6  
NFIB  
HEMGN  
SLC2A14  
FKBP9  
BRD3  
TRAIP  
YME1L1  
HSPA13  
ZNF121  
RPL37A  
PDGFA

SUPT4H1  
KIAA0494  
PUS7L  
UBXN6  
C16orf74  
DGKZ  
CSE1L  
SLC35G3  
KLHL9  
ARCN1  
ESF1  
SPIN4  
SRSF2  
RNF38  
TPRX1  
TTC32  
SLC20A2  
RPU3D3  
MAP2K2  
C8orf45  
MCM8  
SYNCRIP  
SLC2A8  
08-Mar  
CCDC154  
PNRC1  
RPS27L  
RAB33B  
PUF60  
WDR45  
ZNF585B  
C1orf31  
PARD3  
NDRG4  
F12  
MRPS27  
UNC45A  
UNC45A  
POMZP3  
HOMER3  
ARL1  
TBCEL  
PTPN20A  
PGAM1  
POU4F1  
EIF4EBP2  
SREBF1  
CSPG4  
WDR62  
C3orf64

SLC38A9  
SLC35D2  
SUSD5  
DSE  
PSMD5  
ARHGAP1  
GUCA1B  
SGPL1  
MRPS12  
CA9  
RECQL4  
OSBP  
AMDHD2  
RP11-691N7.6.1  
GRPEL2  
WASF3  
DCLRE1B  
RP11-305M3.3.1  
MBD2  
SETD7  
DEPDC7  
PHF10  
BORA  
CNOT4  
C11orf1  
GRPEL1  
TPH2  
PLSCR1  
DFNB31  
ACR  
ZFP30  
XPOT  
TEAD3  
FAM70A  
KIF5B  
TSG101  
NIT2  
RNASEH2A  
RPS6KA4  
U2AF1  
SF3B4  
ADARB1  
SRSF10  
MCF2L2  
TRA2B  
RYS2  
CHMP4B  
PAFAH1B3  
CAMK1  
UNC119

MRPL42  
HIST2H2AC  
LAPTM4A  
CTD-3074O7.11.1  
CYB561D2  
CDC45  
PSMA2  
C19orf43  
EFNA2  
FAM171A2  
KCTD18  
VEGFB  
TRIM74  
SNF8  
PARVA  
ORMDL1  
REEP2  
NDUFS8  
EFHA1  
RNF216  
GPX1  
ADAM9  
MRPS2  
CHRNE  
SERTAD3  
JOSD1  
C7orf30  
DDX55  
FAU  
DCUN1D3  
SLC13A3  
CHUK  
SEC61B  
PANX1  
APOBEC3G  
VAMP7  
AP3M2  
ICAM4  
SLC16A3  
DLK2  
TEFM  
RUFY2  
RMND5A  
NLRP6  
TBP  
RBBP4  
C8orf38  
NEDD1  
DDAH2  
RACGAP1

SIM2  
IGF2BP1  
FRMD6  
ORMDL2  
NIPSNAP3A  
JAGN1  
UBN1  
CNN3  
C9orf25  
G2E3  
GANAB  
NAGS  
PAIP2  
AKIRIN1  
FOXN2  
OGFOD2  
AMZ2

Supplementary table 4: List of negatively coregulated genes with top5 LncRNA

| <b>RP11-480I12.3.1</b> | <b>PVT1</b>  | <b>RP11-783K16.5.1</b> | <b>PPP2R3B-AS1</b> | <b>RP11-359M6.1.1</b> |
|------------------------|--------------|------------------------|--------------------|-----------------------|
| TNFRSF6B               | EIF3L        | OR6S1                  | RAPGEF2            | COX5B                 |
| SYT15                  | KLF15        | ICAM3                  | PHC3               | PIGV                  |
| PRKCA                  | ZNF211       | JAM3                   | SH3BP5L            | BIRC2                 |
| DUSP18                 | DDX59        | LRMP                   | FAM127B            | IGFLR1                |
| UFM1                   | DHRS9        | C1R                    | VPS37B             | SLC25A23              |
| PSMG2                  | DPEP2        | IL17F                  | HNRPDL             | CTF1                  |
| FAU                    | TMCO4        | NLRC3                  | TMEM129            | AQP8                  |
| P2RY13                 | RGAG1        | FUT7                   | KCMF1              | CIITA                 |
| HBA1                   | DOCK6        | CD2                    | TMED1              | XKR9                  |
| ENOX1                  | SIL1         | CNR1                   | EGLN2              | ZCCHC4                |
| ARHGAP9                | RG9MTD2      | ITGAX                  | PRPF19             | IL1RL2                |
| LHPP                   | ANKRD18A     | VAV1                   | GNB5               | PRRT1                 |
| C19orf54               | PDZK1IP1     | PTPRD                  | LSM6               | EGFL8                 |
| MSRA                   | MYBPC3       | F10                    | CXorf56            | SIGLEC11              |
| MSRA                   | RAB36        | SEL1L3                 | SLC22A15           | C5orf60               |
| FYN                    | SLC6A1       | HBE1                   | PRMT10             | NKIRAS1               |
| NNMT                   | ARSA         | LILRB1                 | KRTAP10-2          | KIAA1522              |
| ARGLU1                 | ITPKB        | SEBOX                  | RWDD4              | ATXN2L                |
| SSC5D                  | WFS1         | PTPRC                  | DHX33              | PITPNM3               |
| PAN3                   | CLSTN3       | KIAA0564               | SHMT1              | RAB6C                 |
| IL6ST                  | ACE          | COQ4                   | CCDC132            | SDC4                  |
| HBA2                   | ASB3         | ARHGDIB                | PREX2              | RSPH6A                |
| PRKCDBP                | SULT1C2      | NEK3                   | ZBED1              | CORT                  |
| XKR9                   | ATP1A2       | PLA2G7                 | STON2              | FOPNL                 |
| RPL13A                 | RTBDN        | TMEM176A               | C19orf6            | RANBP3L               |
| CSF1                   | KCNS3        | TAL2                   | PSMC3IP            | TM4SF1                |
| TPT1                   | SLC22A10     | CIDEB                  | CHRNA9             | FAM82B                |
| NECAB2                 | NXF1         | REPS2                  | CBLL1              | METTL20               |
| TMEM173                | RIIAD1       | FCN1                   | CCDC43             | QRSL1                 |
| C16orf5                | PDZD9        | CHIT1                  | UEVLD              | UTP11L                |
| C16orf5                | RP3-486B10.1 | ALG12                  | HNRNPH3            | NME4                  |
| SYVN1                  | BLVRA        | SLFNL1                 | ALX4               | MED26                 |
| ALG13                  | HLA-DQA1     | SLAMF8                 | CD163              | MRPS17                |
| C9orf131               | ENOSF1       | MUCL1                  | TMPO               | PRICKLE3              |
| RPS11                  | IDI2         | SGCZ                   | NUP205             | HDAC7                 |
| LTBP2                  | FXVD2        | TSPAN7                 | CHD7               | FAM200B               |
| PLCXD3                 | SPATA20      | CYBB                   | TPH2               | C16orf42              |
| PALM2                  | PRODH        | KCND2                  | SEC61A1            | NUDT12                |
| BMP2                   | ANK2         | PAN3                   | RABEP1             | IL4R                  |
| HLA-DQA2               | ALG5         | MEOX2                  | RASSF10            | NMNAT1                |
| ST6GALNAC6             | SPINK4       | CYP26B1                | HCN3               | DAB2IP                |
| FBXL3                  | DCLK2        | CDKL1                  | PTCD2              | LMAN2L                |
| LPCAT2                 | TJP3         | PPM1K                  | AVEN               | AJUBA                 |
| C4orf52                | PBLD         | FGD5                   | PPP3CA             | TMEM106B              |
| POMP                   | SULT1A4      | C13orf15               | C17orf75           | TRIM47                |
| TIMP1                  | ECSCR        | FRMD1                  | GPBP1L1            | NECAP2                |
| RNASEK                 | ECSCR        | SEMA4D                 | FOXG1              | GLTPD1                |
| FMNL1                  | NRCAM        | MFNG                   | R3HDM1             | TMEM88B               |

|                 |             |            |          |                 |
|-----------------|-------------|------------|----------|-----------------|
| PPM1N           | TMEM163     | TM7SF4     | NLK      | ARFIP1          |
| AKAP11          | WVOX        | DIO3.1     | KBTBD4   | KDELR2          |
| SLC16A7         | KPNA7       | TAGLN      | AFTPH    | SPHAR           |
| RPS2            | TBC1D8B     | GMFG       | NOL10    | ZCRB1           |
| ZCCHC9          | PPYR1       | C11orf96   | FAM110A  | MKNK2           |
| AIF1            | THBS4       | LRRTM3     | TPI1     | LCTL            |
| C6orf221        | PZP         | PPIAL4G    | ARL1     | RAD23A          |
| TRIM8           | TSPAN32     | ATP7B      | LIG1     | PROS1           |
| DPP9            | TRAF5       | LRRC55     | DDX47    | PNO1            |
| TRPC3           | PPP2R5A     | WNT2       | KRTAP1-1 | GABRE           |
| SLC6A3          | TLR2        | CITED4     | TFAP2B   | PPID            |
| PDLIM2          | UPK3BL      | PROX1      | ATP5G2   | SPG21           |
| VSTM2L          | DIO1        | IL12A      | DCAF5    | CCDC134         |
| UTS2            | HNMT        | KCNB2      | NMUR2    | RP11-286N22.8.1 |
| RPL36A          | PLA2G4F     | GIMAP5     | CLN8     | CASP8           |
| RP11-343C2.11.1 | VIP         | SMPD2      | ANO7     | CTNNBIP1        |
| GLIPR2          | AC002472.13 | AC007952.1 | CADPS2   | FEM1C           |
| TRAM1           | HIST1H1T    | CREB3L3    | MDM4     | EPB41L1         |
| SLK             | AC002365.1  | SYT5       | WEE1     | RAB11FIP5       |
| SH3D19          | KLHL6       | P2RY10     | RMI1     | STK3            |
| PTGES           | KCNC4       | HOXA5      | C1orf85  | TEF             |
| TP53INP1        | VSIG2       | ACVRL1     | CD276    | RAP2C           |
| RPL36           | BHMT2       | C20orf160  | EFR3B    | CNGB3           |
| COLEC12         | CRISP2      | C3         | NAIF1    | ZNF557          |
| INSL4           | ZNF155      | POU3F3     | RREB1    | TOM1L2          |
| RAB31           | LRCH4       | SIM1       | IMMT     | FOSL2           |
| ATL3            | ACCS        | FUT1       | GPC5     | SDHB            |
| KIAA1704        | TLR6        | NLRP3      | THRAP3   | VAMP3           |
| PABPC5          | C2orf73     | ARHGAP9    | 43354    | BOLA3           |
| PRKG1           | CYS1        | APOD       | GDAP2    | BRP44           |
| MRPS28          | KANK3       | RNASEH2B   | PRPS1    | PSMB2           |
| NRN1            | ATXN7L2     | CSMD1      | CENPA    | CHRNA6          |
| IRS1            | SDPR        | CTC1       | ATP5A1   | MTFMT           |
| MFAP4           | PTPN2       | CLVS1      | PROM2    | PFDN1           |
| DERL2           | AGRP        | TNFSF8     | ZNF410   | ATP5H           |
| RAP1A           | ARID3B      | PLEKHH2    | RSC1A1   | ADSS            |
| RPL23           | ARSD        | MPP1       | TRA2B    | NTPCR           |
| PIM1            | CNKSR1      | CTSK       | NAA35    | NDUFA6          |
| ZBTB16          | PAQR6       | TLR5       | LAMB3    | ITPRIPL2        |
| CLIC2           | AGAP4       | POLR3GL    | DUT      | YAP1            |
| MMP23B          | TMEM241     | MCOLN2     | SNPH     | NCOA2           |
| PNMA2           | MCOLN3      | IGJ        | TRIM22   | BRPF3           |
| MLC1            | KIAA1377    | FAM50B     | KIF18A   | POLH            |
| CYP27B1         | PRB2        | SERPINF2   | SPRY3    | PIGZ            |
| PDE2A           | ATP10D      | PALM       | COBRA1   | HSD17B12        |
| SH3BGRL3        | DCAF8       | LDLRAD2    | ANGEL1   | MLLT1           |
| ZBTB46          | LPXN        | KCNA5      | ZNF821   | MTCP1NB         |
| GALNTL2         | BCAS3       | CLSTN3     | KANK1    | TEX261          |
| IER3IP1         | CPVL        | CERKL      | SNX19    | FRMD4A          |
| EGFL8           | RBM33       | ZG16B      | GBX1     | GAS2L1          |



|                |                   |          |          |          |
|----------------|-------------------|----------|----------|----------|
| GPR34          | SLC6A7            | RERG     | PIAS4    | SATB2    |
| CELF2          | CTSH              | GMDS     | DDX20    | OGFRL1   |
| DPYSL2         | SIGLEC1           | MMP9     | KCP      | RAB43    |
| CCDC165        | ABAT              | CDKL4    | GYLTL1B  | TNFRSF1A |
| C8orf45        | INTS12            | MAPRE2   | KCNA4    | ZNF283   |
| MSMO1          | TTR               | IZUMO2   | HEATR2   | TXNDC2   |
| RPL10          | BIRC7             | RALGAPA1 | TMSB15B  | S100A11  |
| ROBO4          | SH3YL1            | P2RY13   | EMX1     | ELF4     |
| ZCCHC7         | OFD1              | SLC9B2   | SCIN     | KRT85    |
| PTGER3         | CEP192            | KIR2DL1  | PIP5K1A  | CNOT4    |
| POLR1D         | MUC15             | RHOH     | CHRNA5   | FNDC8    |
| VAPA           | ELANE             | LRRC2    | TARDBP   | CCDC58   |
| TLL11          | KIF19             | AGAP3    | CNOT3    | FKBP14   |
| BET1           | SLC39A8           | FMO1     | RPN1     | MUL1     |
| RP11-691N7.6.1 | CNGB1             | RGS9     | RAB22A   | GDPD4    |
| RFXAP          | HSD17B4           | CPZ      | NSDHL    | CTR2     |
| SEMA6D         | HTRA4             | GLCC1    | HOXD3    | MRPL3    |
| MRGPRF         | MAN2C1            | VPS36    | AP2A2    | BAG3     |
| RRM2B          | NUDT9             | ANGPTL1  | CYP3A7   | NR1D1    |
| UXT            | USO1              | CCL11    | TRRAP    | TMEM201  |
| FAM167A        | RP3-412A9.1:IL17D |          | ANGPTL7  | LRRC8E   |
| MAP3K14        | C12orf10          | ATP11C   | RRP8     | FOXK1    |
| KCTD12         | LRRC43            | PODN     | TET3     | KIF1B    |
| ACTBL2         | TMC6              | VIPR2    | FAM82A2  | C3orf38  |
| TRIP10         | NUCB2             | KCNH8    | FDPS     | PDCD7    |
| AGPAT3         | RPGRIP1           | CACNB2   | SLFN12   | SHISA5   |
| AGPAT3         | FAM183B           | PRKCB    | GSK3A    | TMEM186  |
| CHST15         | RPL4              | INHA     | NPSR1    | MIDN     |
| MT1P2.1        | SAMD14            | NUAK2    | TMEM187  | PPARD    |
| RTN2           | FASTKD1           | TNFSF12  | OR2T33   | UBE2W    |
| LCP1           | PKD2              | NKD2     | ABI2     | PIGO     |
| SLC20A2        | DAAM2             | IHH      | ARID1B   | 43162    |
| NDUFA11        | FAM82A1           | TBX2     | DMRT3    | PLEKHM2  |
| KANK2          | CCDC87            | LOXL4    | BMP1     | TRPC4    |
| RP11-330H6.5.1 | SHF               | CCDC48   | USF1     | BCAR1    |
| ITGB3          | MCOLN2            | PAPLN    | H1FX     | GNG12    |
| RRAS           | VCX2              | SNAP25   | POU2F1   | MRPL30   |
| JAK3           | KIAA0040          | ZFP42    | GCNT1    | C7orf70  |
| MPP4           | EMILIN1           | MIXL1    | ACTR2    | MRPS11   |
| CNRIP1         | MYO7A             | BTNL2    | SLC12A4  | RNF13    |
| EPAS1          | APBA1             | PCSK1N   | GABPB1   | SMAGP    |
| SYNJ1          | RP11-645C24       | KPRP     | FAM122B  | FAM168B  |
| CAPNS1         | HMCN2             | IGFBP2   | TNRC6C   | KPNA6    |
| LYL1           | HMCN2             | CXCR6    | COG1     | EF3      |
| C8orf40        | HMCN2             | AGPAT2   | PDK3     | SRD5A3   |
| ABLIM3         | HMCN2             | TDRD3    | PROSER1  | FOXJ2    |
| ZMYM6NB        | ARHGAP8           | NDP      | KIAA0141 | ARHGEF35 |
| EFEMP2         | CCDC149           | RDH12    | HRAS     | CIB3     |
| MSRA           | FAM65C            | KRTAP4-8 | OR52I2   | ZC3H8    |
| MSRA           | RHBG              | PTK2B    | NFRKB    | CPSF7    |

|              |            |                  |                |          |
|--------------|------------|------------------|----------------|----------|
| SGPP1        | EGFL7      | UNKL             | APOL4          | PEX13    |
| GLIS2        | BLM        | CD27             | RP11-526J3.3.1 | NXT2     |
| PTAR1        | WFDC10B    | REM1             | CDC73          | QTRTD1   |
| SCARF2       | CACNB2     | GIMAP8           | 43346          | CCDC168  |
| CCDC36       | RAMP3      | IL13             | SP2            | PDCD10   |
| HRSP12       | FAM47E     | GFI1             | CGGBP1         | SLC6A8   |
| PNMT         | UBOX5      | ELAVL3           | FAM64A         | TEAD3    |
| GIN1         | FGD3       | TRANK1           | FAM72D         | MAP2K1   |
| PYCARD       | ARHGEF15   | USH1C            | DCAF12L2       | TIMM8A   |
| C8orf59      | C9orf174   | RP11-1286E23.18. | MPP6           | RAB3D    |
| AL928654.7.1 | FBXL15     | GALR1            | AP2B1          | NME2     |
| C10orf125    | BDH2       | ZEB2             | PDS5B          | HDGF     |
| CD209        | ELMO1      | LIPC             | CDAN1          | NACC1    |
| CLIP3        | ABCA10     | PRUNE2           | TRIM26         | CLCN1    |
| LILRB5       | GCM1       | EPHA5            | MXD3           | TBC1D22A |
| KDELR1       | FREM2      | NRIP2            | MTMR8          | HN1L     |
| MEFV         | CABYR      | OR9A2            | OR8S1          | UBXN2A   |
| H6PD         | OSCAR      | TRPM8            | SPC25          | SUMO3    |
| TGFB2        | MUC5B      | KIAA0748         | MED27          | CDKN1A   |
| PMP22        | RNASE13    | MLC1             | C17orf59       | MMACHC   |
| RPS13        | KIAA1456.1 | CELF6            | ARPC1A         | ATXN7    |
| PTPRE        | POLG       | LXN              | CSNK1G1        | RAB7A    |
| PURA         | FUT1       | FAM169B          | PDRG1          | BTBD1    |
| MMP2         | AKAP13     | RPGRIP1          | GCC1           | PAPOLG   |
| RASIP1       | KIF12      | GK               | HTR4           | RIOK2    |
| USMG5        | NOD1       | LSAMP            | RPUSD4         | C1orf122 |
| IGFBP4       | AZU1       | C1S              | SAT2           | LPAR2    |
| CCL2         | SNCAIP     | CYP2A7           | RBM18          | NOL12    |
| MAPK11       | SAA2       | RGL4             | CLDN2          | TOB2     |
| USP12        | CYP2C8     | NBL1             | DDX19A         | ICT1     |
| DOK5         | TUBB1      | RFX4             | KDM4A          | FAM83G   |
| CLN5         | LRRCC1     | NPM2             | IDH3A          | NDUFB4   |
| IMPA2        | PCSK6      | STAMBPL1         | NOA1           | NDE1     |
| CA5B         | CAMK1D     | PARM1            | SERPINH1       | MAPKBP1  |
| FBXO47       | ACTG2      | CD180            | UBAP2L         | RAB11B   |
| RPS29        | TCIRG1     | CYSLTR2          | ZYG11B         | PABPC1   |
| C16orf74     | GAS2       | AIRE             | AWAT2          | OSBP     |
| CECR6        | SYTL2      | ADAMDEC1         | PSMD14         | ACAN     |
| GABARAP      | SAA2-SAA4  | PLA2G2D          | APOA1BP        | RAC1     |
| MFRP         | CLEC3B     | TNFRSF17         | ZNF408         | MAT2A    |
| MS4A4A       | GPR20      | EVX2             | MPDZ           | TOB1     |
| FAT4         | MYO7B      | FOXL1            | MEX3B          | PSMD12   |
| C14orf1      | ACSM5      | STMN4            | IL1RAP         | HIF1AN   |
| CLEC11A      | CINP       | LRRCC9           | IL1RAP         | ZFR      |
| IGSF21       | CINP       | LMOD1            | H2BFM          | RNF7     |
| XCL2         | CCNT2      | ASGR2            | MARS2          | BRD2     |
| PTPRG        | TEKT3      | PLA2G5           | SETD3          | SUMO2    |
| ABHD13       | MYH15      | SOX14            | CNTNAP2        | EPS15L1  |
| RPL30        | ARRDC2     | TXK              | RPAP3          | GTPBP8   |
| SLC16A2      | PHKB       | GALNTL5          | XPO7           | CCNK     |

|                 |             |              |               |          |
|-----------------|-------------|--------------|---------------|----------|
| CACNB4          | MRPL1       | PPT1         | ING2          | CCDC120  |
| OR52N4          | CDHR3       | GLT8D2       | ATG4D         | ULBP2    |
| RP11-728F11.6.1 | GSTP1       | CLEC6A       | USP35         | AMZ2     |
| NEK7            | RIPK3       | SKOR1        | MORC4         | PHACTR4  |
| BEGAIN          | FOLR2       | KLRF1        | BDP1          | SCAF4    |
| EPHA2           | NLRP3       | YPEL3        | BAZ1A         | MRPL4    |
| IGFBP6          | MAT1A       | SOCS1        | ZNF445        | POLDIP3  |
| C1orf198        | STAC3       | CARD8        | ELF2          | MED14    |
| FSTL3           | APOD        | AC006276.7.1 | ENOPH1        | ATXN1L   |
| GJA9            | FAM22E      | MYH8         | SENP1         | WBP2     |
| TGFB111         | ANKRD18B    | TSGA10IP     | POGK          | CNNM4    |
| VASN            | RNF113A     | BLNK         | B4GALT3       | CRCP     |
| DIMT1           | PARD3B      | KCNA1        | B3GALT4       | C1orf212 |
| PRKCB           | ATP8A1      | TESC         | CLASP1        | TADA2B   |
| RAB12           | OSR1        | PGM5         | NCSTN         | TBC1D13  |
| NR5A2           | MTRNR2L3    | DLGAP2       | YY1AP1        | YY1      |
| FAM155A         | CIDEB       | FAM9B        | RP11-330L19.5 | SNIP1    |
| DPF3            | C21orf2     | SH2D3C       | DSN1          | TMEM41A  |
| RAB37           | PSD4        | ZNF683       | A4GNT         | LDLR     |
| SH3RF3          | TXLNB       | C12orf68     | STAG1         | POLR3H   |
| CAMLG           | MIA2        | LAMB1        | CCDC110       | HEBP2    |
| COMMD6          | SYTL1       | CDK5R2       | USP46         | PHF13    |
| NFIX            | DHRS12      | RGS21        | EHMT2         | TAX1BP3  |
| LINC00493       | C20orf132   | RASGRP2      | LARGE         | ABHD5    |
| C14orf178       | RP11-1000B6 | GAB3         | UGT2B10       | SRPK1    |
| FAM159A         | SFI1        | COL22A1      | TRIM40        | ADAM17   |
| RP1-164F3.9.1   | ZFP3        | CDX1         | SCLT1         | ORC2     |
| SOCS2           | FAM180B     | OLFML1       | MDGA2         | SHMT1    |
| DNM1            | JSRP1       | KBTBD7       | GALNT6        | TRA2B    |
| MPO             | OVGP1       | HOXA2        | KLHL12        | PIAS4    |
| PRDM8           | PHACTR3     | HCST         | AC092835.2.1  | PIP5K1A  |
| OSMR            | ABHD14A     | TRIM72       | WIPI2         | USP46    |
| CYTH3           | HMGCLL1     | ARL5C        | ARL15         | FBLIM1   |
| SPSB1           | ERCC5       | PTPN7        | FBXO10        | TWISTNB  |
| RWDD1           | PANX2       | LRRC32       | FBLIM1        | HSD17B1  |
| ZC3H12D         | ITFG2       | CST1         | CCDC155       | APEX2    |
| FOPNL           | CROCC       | HLA-DOB      | POU6F2        | TSC22D2  |
| NEFM            | TMEM114     | GPSM3        | GSC           | MAPK14   |
| FRMPD4          | GRAMD1C     | ZNF540       | ASCC3         | PLSCR1   |
| SUSD3           | USH1C       | GPR142       | ZBTB33        | H3F3B    |
| HRH4            | CIRBP       | ERN2         | CCDC129       | PAK1     |
| CD248           | ACY3        | SBK2         | HMGCS1        | TCEB3    |
| PHYHIP          | PDE8B       | POU2F2       | SIPA1L1       | COMMD2   |
| RPS16           | XKR8        | SFRP1        | UBE3C         | ZNF121   |
| MYL9            | ASB4        | FCRL3        | TCEB3B        | ZDHHCS   |
| REG1A           | TSPAN7      | SLC6A7       | ZNF221        | AP1B1    |
| TMEM200B        | SP140L      | UBOX5        | DDI1          | SRRM1    |
| F3              | MYOZ2       | MEP1B        | CCDC158       | FBXO3    |
| FAM101B         | SLC6A12     | SLC25A45     | EHF           |          |
| CIDEA           | CTC1        | TMEM204      | UNC119        |          |

|                 |              |                |           |
|-----------------|--------------|----------------|-----------|
| RARRES1         | MAD1L1       | CLEC12A        | PTX3      |
| AP1S2           | CC2D1A       | PRKCQ          | ALYREF    |
| HHEX            | ITIH1        | OR2L2          | FZD9      |
| CD300LD         | MS4A8B       | ATP10D         | WDFY3     |
| BCL9L           | NOTCH4       | BHLHE22        | HAS1      |
| HIC1            | C19orf71     | CACNG3         | DIEXF     |
| AKT3            | RP3-402G11.1 | REG4           | FANCA     |
| C8orf58         | ZNF76        | TAC3           | ABCF1     |
| FAM89A          | ADAMTSL2     | GNRH2          | CLTC      |
| KIRREL          | LRIG2        | SORBS1         | TWISTNB   |
| TMEM45A         | THADA        | CRYGS          | ZNF217    |
| PDPN            | CC2D2B       | NTRK3          | LRIG3     |
| SLC38A9         | TFB1M        | C20orf132      | GALK2     |
| TMEM236         | SEC16B.1     | SLC17A7        | PLS3      |
| AFF3            | KIAA0513     | AC092165.4.1   | CHRNA2    |
| RPS25           | SKOR1        | SEC31B         | ASH1L     |
| RP11-293I14.2.1 | TESC         | DISP2          | LRRC37B   |
| EDEM1           | ATP6V0A1     | PLA1A          | POLE      |
| RNF125          | C20orf160    | COL16A1        | PM20D1    |
| STK24           | GLB1L        | SPATA13        | KCNQ1     |
| SPCS2           | TRAPPC12     | TRIM13         | ASRGL1    |
| CTH             | HERC5        | BEND4          | CA6       |
| DGAT2L6         | GRID2IP      | MAPK4          | KRTAP4-5  |
| LRRC8C          | TUBGCP6      | CDH7           | SMC4      |
| PPP3CB          | KBTBD7       | MAP4K1         | ZNF92     |
| BCL2A1          | SULT1A3      | PTPN6          | OMP       |
| STK17A          | CLDN15       | CTSS           | WDR20     |
| IFITM3          | EPM2A        | TRAF3IP3       | MAN2A1    |
| TMEM14C         | ZNF683       | GNG7           | LEMD2     |
| CCL13           | LGI4         | KCNS2          | PLCG1     |
| FNDC4           | RP11-295P9.3 | ST6GAL1        | DDX54     |
| UQCRB           | P2RX1        | CHGB           | AKAP1     |
| FXD6            | NRIP2        | TMEM196        | SLC17A1   |
| SLITRK5         | SSR4         | BFSP2          | DCUN1D2   |
| TFAP4           | TCEANC       | ZCCHC5         | STARD3NL  |
| OSTM1           | TSPO2        | FKBP11         | FAM71C    |
| EFEMP1          | GPR111       | GABBR2         | ZNF645    |
| MXRA8           | RASGEF1B     | TTN            | B3GAT2    |
| RPL10L          | MEGF6        | FAIM2          | CASR      |
| COL16A1         | CRYBA4       | RERGL          | KIDINS220 |
| CYP26B1         | 43168        | SLC25A21       | ZNF695    |
| GPR180          | GPR162       | SPOCK2         | ARMC8     |
| LEPREL2         | C1QTNF7      | CSRP1          | TRIM34    |
| KIR3DX1         | CXCL17       | CLDN5          | OTUD5     |
| SIGMAR1         | COL4A3       | RP11-176H8.1.1 | C7orf26   |
| HVCN1           | HEXDC        | PRDM6          | TMEM2     |
| LAYN            | AC006276.7.1 | ASB15          | PRMT6     |
| CCR1            | IFT140       | LRRC7          | CHID1     |
| CDK17           | SLC4A8       | 43349          | CNDP1     |
| SMOC2           | NENF         | C8orf84        | GSS       |

|             |             |          |          |
|-------------|-------------|----------|----------|
| EIF4EBP2    | TMEM59L     | GIMAP1   | SPIN3    |
| PDE3B       | ZNF837      | HRH3     | MIP      |
| PDE3B       | CLK1        | ADM2     | ATP2A3   |
| USP53       | FAM5C       | SLC39A5  | OR10AD1  |
| ANKRD29     | ZNF446      | TMEM47   | SAC3D1   |
| B3GNT9      | C17orf47    | OR4C3    | TNIP1    |
| FGFR1OP2    | HMBOX1      | GFRA4    | EIF2B5   |
| F8          | HHATL       | DPEP2    | PNPLA5   |
| THAP1       | GEMIN8      | FIBIN    | UBXN2B   |
| BCAT1       | NFE2        | FRMD3    | IFI27L2  |
| SRPX        | SMPDL3B     | ABCA5    | DNAJC19  |
| LRRC4C      | RGPD5       | KLK12    | RAC3     |
| SYDE1       | SLC47A1     | FGF16    | SMARCB1  |
| NHP2L1      | MAPK10      | PLCB2    | MYO1A    |
| RNF5        | ZBTB48      | CEACAM21 | MCM3AP   |
| AOX1        | BIN2        | BARHL2   | MADD     |
| DSEL        | YPEL3       | ABI3BP   | IGSF9    |
| TWSG1       | NROB2       | KLHDC1   | LARP4    |
| IQCJ-SCHIP1 | WDR81       | PHOX2B   | DOCK7    |
| CHRD1       | C4orf44     | PLSCR5   | HSD17B1  |
| TCF7L2      | C1orf141    | FBLN1    | ZXDA     |
| CHCHD10     | LDHD        | LAMA2    | EPHB2    |
| CD109       | TPSG1       | ANP32D   | SLC2A14  |
| TM6SF2      | TXNDC3      | CEACAM4  | SCN1A    |
| HBB         | ELN         | C4orf50  | FOXD2    |
| TMEM50A     | APOB        | OSBPL1A  | FAM104A  |
| EMP3        | ERN2        | MNX1     | MRPL12   |
| FAM20C      | XAF1        | PHF21B   | RAB24    |
| PCOLCE      | YIPF1       | GRAP2    | RHBDL2   |
| RSPO4       | IFI30       | RLBP1    | GPAM     |
| NFE2L3      | CASP1       | CAP1     | STRN4    |
| GZMA        | AMIGO2      | NKX1-1   | ZNF687   |
| MARVELD1    | PPP1R3D     | AKAP4    | LGMN     |
| ECSIT       | STX16-NPEPL | STRA6    | CDC5L    |
| ZEB1        | MAPK13      | C5orf58  | CASC5    |
| ALOX5AP     | AASS        | RIMS3    | ALG10B   |
| ANXA5       | BTN3A1      | CLLU1OS  | MGAT1    |
| MRGPRX2     | C14orf2     | RTBDN    | FAM134C  |
| TIMP2       | PEX11G      | RLF      | ADH5     |
| TMEM11      | COL18A1     | ADRA2A   | TBL2     |
| MOB3A       | ANK3        | GPR25    | PWP2     |
| EFCAB9      | F10         | FAM155A  | APEX2    |
| UBLCP1      | KCNE3       | BPIFA1   | ALAS1    |
| PLP2        | FAM184A     | CYP2A13  | IRGQ     |
| SPOCK1      | PIWIL4      | IL17REL  | CECR5    |
| RPL26       | TCN2        | GSTM5    | ZNF718   |
| C19orf12    | DNAJB13     | CALCB    | PDIA3    |
| FAM40B      | SLC5A4      | PRR20D   | ZFAND6   |
| FAM70B      | TLE6        | DIO2     | C3orf52  |
| LMNA        | ASB5        | CYGB     | ATP6V1B1 |

|               |              |                 |           |
|---------------|--------------|-----------------|-----------|
| MSRB3         | FAM116B      | SLAMF7          | DCTN5     |
| ERVMER34-1    | SGSM3        | NPPB            | MFN2      |
| PAG1          | NCKAP1L      | POU4F2          | TLE3      |
| CTBS          | LRRC39       | CPEB4           | GIT1      |
| ITGA4         | VIPR1        | COL4A4          | AGFG1     |
| PPP1R3F       | NSUN7        | DPT             | PHC1      |
| NUDCD2        | TRADD        | DCLK2           | NDC80     |
| DAD1          | CD101        | NCF1            | CAMK2B    |
| IL4R          | RAB20        | SELS.1          | TMTC4     |
| VAT1L         | TRABD        | GNG8            | EBP       |
| SLC7A1        | SMARCD3      | KCNH6           | AZIN1     |
| GYPE          | LRRN3        | ESR2            | CCDC99    |
| SIGLEC15      | C19orf45     | EVI2B           | ADCYAP1R1 |
| TMEM169       | TNIP3        | CYTIP           | C14orf180 |
| DAB2          | CTPS2        | ZBP1            | TSC22D2   |
| RARRES2       | ARHGAP25     | PBOV1           | ACSL3     |
| GFRA1         | GGA1         | TDRD6           | SIRT3     |
| UBXN8         | UNKL         | PHACTR1         | LRP3      |
| ZCCHC24       | OR51B4       | NCKAP1L         | FAM13A    |
| CAMK2N1       | CALCOCO1     | FNDC3A          | MRPS23    |
| ANKRD60       | RP11-505K9.4 | RELN            | SPDYE2    |
| DNAJC25-GNG10 | FMN2         | MYOM2           | CCDC50    |
| SEC61G        | ABCA9        | RET             | GLYATL1   |
| MSN           | DPH5         | CD37            | TRAK1     |
|               | 43353        | EML3            | AQP12B    |
| KATNAL1       | FBXO40       | BAALC           | TNRC6B    |
| DEGS1         | TSPYL6       | C20orf196       | LCLAT1    |
| PTRF          | OR2L13       | KLK14           | TMEM177   |
| GSR           | ATPAF2       | KCNN3           | RNF2      |
| MXRA7         | CDH26        | SPESP1          | CDH24     |
| IFITM2        | NPIPL3       | KCNIP1          | THTPA     |
| MBLAC2        | CDX1         | RP1-310O13.12.1 | TTBK2     |
| TM9SF2        | STAT4        | ZNF643          | HIP1R     |
| KLHL29        | PLEKHH2      | PIM2            | SLC37A1   |
| CREB3L1       | FLT3LG       | NNAT            | FAM100B   |
| EDIL3         | FGD2         | PRICKLE2        | ZDHHC17   |
| SPON2         | GRID1        | MAOB            | CLOCK     |
| EHD2          | AMICA1       | KCNC2           | ZNF77     |
| CSF2RB        | LIMS2        | BPIFB2          | PHKA1     |
| CST7          | CAPN3        | CGA             | ARFGAP2   |
| TRIM47        | NAGLU        | SALL3           | WDR53     |
| ACCN4         | ZG16B        | RNASE4.1        | TBPL2     |
| GATA3         | ALG9         | POU2AF1         | GPC4      |
| NDUFB6        | UFC1         | SEZ6            | EPN3      |
| NAA20         | SYNE1        | CYTH4           | EIF4E     |
| RPL27A        | BAI3         | IL3RA           | GPRIN1    |
| CERS1         | KCNRG        | IGFL2           | ENPEP     |
| PROCR         | TLR3         | CTPS            | CLDN12    |
| DIO2          | FAM22B       | MEF2B           | CELA3B    |
| MRPL49        | FCGRT        | WISP1           | CHMP3     |

|              |          |                  |          |
|--------------|----------|------------------|----------|
| CYBRD1       | OXER1    | FOXP3            | TRIM48   |
| CCDC73       | CDRT4    | KLK9             | KLC1     |
| RNF139       | DMXL2    | IL2RG            | RABL3    |
| ADAM9        | USHBP1   | TFF1             | DNAJC22  |
| CXCL5        | UBAP1L   | KCNK10           | POLR2H   |
| GPR171       | PROC     | GLI1             | MLXIP    |
| NTAN1        | VMO1     | ITIH3            | ZNF167   |
| CRTAP        | FOXL1    | CCDC54           | SOX6     |
| ZBTB4        | ALDH5A1  | SERPINA10        | TNIP2    |
| POU2F2       | ZNF547   | DENND1C          | KIAA0232 |
| TEX264       | FOXA3    | GYP A            | CSNK1A1L |
| KCNK3        | LARP7    | TFAP2D           | TRAI P   |
| SEC61B       | PLEKHB1  | KIR3DL1          | TMEM104  |
| PLCD3        | RTDR1    | FOLR2            | C19orf40 |
| C12orf53     | SOCS1    | EPB42            | COG8     |
| AC100808.7.1 | C19orf60 | NEUROD2          | CTSC     |
| RPL22L1      | HAAO     | MTMR7            | DBR1     |
| HSPB2.1      | HBE1     | C8orf80          | NLN      |
| SIGLEC14     | TATDN3   | DNASE2B          | POU4F1   |
| TREML2       | HK3      | FGF18            | TRAF4    |
| LRRN4CL      | DENND3   | RP11-77K12.1.1   | GALNT14  |
| STK17B       | WDTC1    | C1orf95          | HIATL2   |
| IGF2         | ADCY4    | CASP10           | CDON     |
| METTL4       | PTPN6    | PTBP2            | NFYB     |
| GPR176       | MCF2     | 43168            | NARF     |
| ARFIP1       | SEC31A   | LRFN5            | SCGB2B2  |
| COL5A1       | HSD17B8  | ALG5             | ATAT1    |
| STARD6       | GALT     | ITPKB            | MED12    |
| OR5B2        | THAP9    | KIF19            | ZNF292   |
| SCN3B        | C4orf33  | C9orf95          | OXCT1    |
| NECAB1       | C17orf62 | USP17L1P         | RTN3     |
| GP1BA        | KCNJ16   | SLC26A4          | CREB5    |
| FAM180A      | FGR      | ZMPSTE24         | GCA      |
| KDELR2       | ZNF540   | SFRP5            | ZNF287   |
| XPO4         | CELF6    | ABRA             | EHHADH   |
| SLC35F1      | TTC23    | C3orf77          | PRPF40A  |
| FBXL7        | LACC1    | GAGE12G          | SPDYE6   |
| PRCD         | RNPEPL1  | NMUR1            | IGFBP2   |
| PROKR2       | FERMT3   | LCN8             | DCUN1D1  |
| FGF2         | KIAA0408 | FGF17            | PRKRA    |
| HRH2         | ABCB1    | GAGE12J          | UHRF1BP1 |
| REEP3        | ASMT     | CTAG2            | RNF14    |
| SLC16A10     | SEC31B   | PHGR1            | TAS1R2   |
| MKNK2        | UNCX     | DFFB             | OAS1     |
| ZNF729       | OPALIN   | C10orf54         | PFDN2    |
| DIRAS1       | KCNMB3   | NRXN3            | ZNF286A  |
| RPL27        | LRRC49   | GAGE12C          | IGF1R    |
| RAC2         | PLA2G6   | RP11-1286E23.4.1 | CYB5RL   |
| FSCN1        | FATE1    | PTPRN            | PSMD1    |
| RER1         | DENND2D  | HTR1A            | C7orf53  |

|          |          |                  |                   |
|----------|----------|------------------|-------------------|
| CAV2     | DNASE2B  | NEUROD4          | TFDP3             |
| PRRX2    | OR1N1    | COLEC10          | TRPV6             |
| BTBD19   | PLA2G12B | UGT3A1           | BMP5              |
| HSBP1L1  | MAP1A    | KIF21B           | TAF11             |
| ARPC3    | MTIF3    | GAGE12H          | ZNF195            |
| NOG      | KIAA1755 | GAGE12E          | SYK               |
| SHC1     | IL29     | POMC             | KLF3              |
| HSCB     | PLA2G12A | SLC7A14          | WDR36             |
| NDUFAF2  | KIF21B   | KIAA0040         | SMARCA1           |
| LY96     | TRPV2    | DSCAM            | STRBP             |
| C17orf39 | CCDC48   | AGBL1            | EIF4H             |
| MSC      | NUDT14   | HMP19.1          | KCNE4             |
| MDFIC    | PION     | L1TD1            | C7orf49           |
| TRIML2   | ASTN2    | PNMT             | SHROOM2           |
| PLEKHA4  | MRPS31   | TRIM49L1         | SS18L1            |
| FSTL1    | FCGR2B   | GAGE12D          | TSSK1B            |
| GNG2     | VWA5A    | GP2              | CKS1B             |
| GAS1     | MNX1     | CTC-554D6.1.1    | GSDMA             |
| PROS1    | H1FNT    | OR2M4            | PIK3C3            |
| HTRA1    | BCAN     | TMCO2            | DIP2B             |
| BPIFB4   | RCN3     | OR2Z1            | GNL3              |
| ZYX      | LAMB1    | SPAG11B          | NEIL2             |
| HECW1    | TNFRSF18 | DEFB121          | C17orf70          |
| NUFIP1   | ABCA6    | GIF              | HNRNPA0           |
| PAPD4    | TNFRSF25 | BARHL1           | TDP2              |
| PPM1F    | KIAA1024 | MTNR1B           | AC005280.1        |
| GNAL     | ITPA     | HIST1H2BA        | IBSP              |
| GUCA1C   | PCSK7    | AC013269.5.1     | C11orf89          |
| RPLP2    | CHRNA3   | OR51G1           | RP11-1286E23.10.1 |
| CYR61    | CD81     | GJA8             | VBP1              |
| DCUN1D3  | C3       | TNP1             | SLC30A3           |
| GXYLT2   | THAP6    | RESP18           | PRMT1             |
| SPAG11A  | HSD17B7  | RP11-234B24.6.1  | FANCM             |
| C9orf21  | RGN      | AC010872.2.1     | PRDM10            |
| PRDM13   | TARSL2   | ZNRF4            | TAF4              |
| STYX     | SERPINF2 | OR52N5           | PLEKHA7           |
| RUNX3    | ZNF182   | GAGE12B          | LRRC8B            |
| C9orf125 | PDZRN4   | GPR139           | PPP2R3A           |
| ISCA1    | PAMR1    | FAM47A           | DDX6              |
| SNAPC2   | CHN2     | MFRP.1           | ASXL1             |
| STMN3    | AGAP3    | GPR119           | POLD3             |
| CNTFR    | ATG16L2  | CST9             | REEP4             |
| SIRPA    | MATK     | CARTPT           | SUPT6H            |
| GLP2R    | TCEB3C   | KRTAP9-9         | CNTNAP4           |
| SREBF1   | CLCNKB   | TAS2R1           | DIAPH1            |
| PHOX2A   | GK       | IL22             | CTDP1             |
| PPP1R18  | RBM20    | GC               | NUP62CL           |
| FUT5     | EPB41    | COX7B2           | SMYD4             |
| SERINC1  | IL11RA   | NLRP13           | H2AFY2            |
| STAT5A   | BLOC1S1  | RP11-548K23.11.1 | FAM122C           |



|               |              |            |               |
|---------------|--------------|------------|---------------|
| MFAP2         | C11orf96     | DYTN       | C5orf25       |
| TWIST2        | AXIN2        | PTH2       | OAS3          |
| CCK           | ALPK1        | GIMAP4     | RASAL1        |
| HAPLN4        | DAK          | NEUROD6    | SERF1B        |
| TBC1D4        | IPO8         | NEUROD1    | PPAT          |
| THAP5         | MCF2L        | GAGE1      | NPTN          |
| ANGPTL3       | DUSP26       | SLC14A2    | ARMC7         |
| USP38         | UNC93B1      | CALB1      | ATP11B        |
| SNX18         | TMEM180      | TMEM74     | NCBP1         |
| ALG2          | CDC42EP5     | GLI2       | EIF4A3        |
| HS3ST3B1      | CDK5         | RETNLB     | RORA          |
| BEND6         | KIAA0564     | RNASE11    | ZSWIM1        |
| SLC35F2       | LRRK1        | IRF4       | AADAT         |
| LIN28A        | TRIM39-RPP2  | PRLHR      | DAZAP2        |
| ZNF99         | MAP6         | GGT5       | ANKFY1        |
| ANKRD13A      | CHPF2        | TRIT1      | YES1          |
| MB21D2        | RABGAP1L     | ABCA10     | DNAJA1        |
| CLMP          | FASTK        | RNF128     | GOLGA6L4      |
| FHL3          | L1TD1        | ALDH1A1    | PTPRA         |
| QRFPR         | CPT1B        | CALCA      | ISY1          |
| TNFAIP8       | UACA         | KIR3DL2    | RIT1          |
| PROK2         | TRANK1       | FAAH2      | PGK1          |
| ADAM19        | DTX1         | CFC1B      | GPR37L1       |
| GFOD1         | SLFNL1       | UMOD       | ACTR3         |
| GFOD1         | AP4B1        | INSM2      | POGZ          |
| IRX4          | BPIFA1       | PAH        | PODXL2        |
| KLK1          | LILRB3       | LIMS2      | POLR3K        |
| BCL2L2-PABPN1 | CHIT1        | SST        | ING5          |
| GFAP          | OCM          | FGL1       | MAPK14        |
| C16orf52      | GIPR         | GAGE12F    | SGPL1         |
| RFTN1         | FAM214A      | GAGE2A     | ZFAND2B       |
| SLC25A32      | TMEM134      | EMILIN1    | CHAF1A        |
| LATS2         | NFXL1        | MMP3       | MTX2          |
| IGFBP3        | TLR5         | INSM1      | ADA           |
| CCL8          | PRICKLE2     | MYCL1      | TRIM52        |
| BSX           | BPIFB2       | PPP1R17    | ZNF777        |
| RAB5A         | NEK3         | AC217771.1 | NPC1          |
| LRRC70        | RP11-762I7.5 | AXIN2      | DHCR7         |
| NXPH2         | CAT          | NEUROG3    | C19orf48      |
| THBD          | STARD10      | C5orf47    | PEX2          |
| BICC1         | NLRP14       | SLC38A11   | MPRIP         |
| RAP2A         | TREML1       | LCN15      | LSM2          |
| ANAPC10       | ZNF18        | RFX6       | VOPP1         |
| C5orf24       | SMPD3        | BAI1       | RPL39L        |
| PHC2          | ZDHHC1       | CFC1       | ARFIP2        |
| RALB          | TNNI2        | ASCL1      | ACTL6B        |
| TTC28         | SORBS1       | KRTAP1-3   | C22orf28      |
| AP005814.1.1  | PRAM1        | CDH17      | DYRK1A        |
| TMEM22        | NAA16        | SSPN       | GS1-211B7.1.1 |
| TTC39C        | ARHGEF10L    | OIT3       | CDC45         |

|                |             |           |           |
|----------------|-------------|-----------|-----------|
| AL034548.1     | INPP5B      | KCTD4     | OTX1      |
| GPR150         | WISP2       | FCRL5     | ZNF148    |
| SKI            | CRYGS       | NDST4     | ZACN      |
| DDA1           | IL12B       | PGLYRP2   | HERC1     |
| FOXN2          | VPS33B      | LY9       | DEK       |
| COL6A1         | CCDC88B     | NOL4      | RPTOR     |
| PPT2           | FUCA1       | ARHGEF25  | NOTCH2NL  |
| WASF3          | SLC46A3     | NEURL     | HAUS1     |
| GPR32          | GUCY2D      | MCF2L     | CNPY2     |
| CAPZB          | GNG8        | GADL1     | INPP4A    |
| ADAMTSL5       | SIDT2       | MYBPC3    | SYT2      |
| IPMK           | TBC1D10C    | ATP8A1    | VEZF1     |
| RP11-122A3.2.1 | MERTK       | PCSK1     | MKRN2-AS1 |
| HEPACAM        | NEIL1       | PDE1A     | HSP90AB1  |
| VMA21          | NRL         | FAM123C   | RNF4      |
| BCL3           | LUC7L       | PPEF2     | NEDD4L    |
| C10orf90       | TSSK3       | IRF5      | CLSPN     |
| KCTD11         | TBCK        | BRCA2     | METAP2    |
| PPP2CB         | ARHGAP15    | SCGN      | PLEKHJ1   |
| IGDCC4         | ARHGAP15    | ZNF642    | TP53I11   |
| GLIPR1         | MLKL        | ASXL3     | ZFYVE21   |
| INSL3          | C5orf38     | LDHAL6B   | PHLPP1    |
| RHOF           | PPIB        | GABRB2    | DDX42     |
| EBF3           | PARVG       | CER1      | UMPS      |
| FGFR1          | RP11-632K20 | LACC1     | SAP130    |
| RPS23          | SURF1       | ZIC3      | MTERFD2   |
| ADAM12         | TECTA       | SCN7A     | MESDC2    |
| XKR6           | EPHX2       | LIG4      | GALNT2    |
| TMEM240        | FGF9        | CPLX2     | STIL      |
| GHITM          | ZNF710      | PCP4      | TUBA1C    |
| SLC25A43       | ADM2        | SLC8A3    | PQLC1     |
| IKZF1          | SETDB2      | RTN1      | DGCR8     |
| SNX3           | ZNF784      | TNFRSF13B | ADAR      |
| VASP           | IL3RA       | SYT4      | SLC5A6    |
| PIP4K2A        | PPIAL4D     | FCRLA     | SNF8      |
| RNASE3         | RIMBP2      | CCDC69    | IPO7      |
| NPW            | ASNS        | CD40LG    | CACYBP    |
| RASA3          | CES1        | LMX1B     | PROKR1    |
| C19orf43       | FLT3        | RTL1      | TRAM1L1   |
| PCDHB15        | LIAS        | DTX1      | ADPGK     |
| QKI            | WDR86       | ANKRD6    | KRR1      |
| XKR3           | RASSF4      | PVALB     | PHEX      |
| PLAU           | GMPR        | TMC8      | ZC3H11A   |
| GOLGA7         | CREB3L3     | PLCG2     | UGT2B28   |
| OSGIN2         | TDRD3       | GRP       | C20orf144 |
| PNLIP          | PDE4DIP     | HS6ST3    | C2orf47   |
| C20orf30       | PMEL        | IGFL4     | ANKRD37   |
| LSM3           | PLEKHO1     | NROB1     | MAPRE1    |
| TOMM5          | SPATC1      | SEZ6L     | CMYA5     |
| HMGA2          | CCDC54      | CST2      | SH3RF1    |

|            |               |          |                |
|------------|---------------|----------|----------------|
| UBE2E2     | GUF1          | RIMBP2   | USP30          |
| VKORC1L1   | LUZP2         | STMN2    | COX4NB         |
| THOC6      | CLDN5         | ST18     | SMARCAL1       |
| ST6GALNAC4 | LAMA4         | KCNT2    | RQCD1          |
| C3orf14    | CAMKMT        | ERO1LB   | KRTAP2-3       |
| N4BP2L1    | ACTA2         | BDKRB1   | NAB1           |
| FAM172A    | USPL1         | RGS7     | KDM5C          |
| PID1       | VAV1          | KCNK9    | ZKSCAN5        |
| IMPAD1     | SLITRK2       | CABLES1  | MRPS12         |
| TMEM158    | ARHGAP4       | DCC      | GYG1           |
| CBS        | ETV7          | GYPC     | NRIP1          |
| PDK2       | COL4A4        | CALY     | ZSCAN29        |
| ZNF385D    | SIGIRR        | CRLF1    | MID1           |
| PXK        | DEF6          | IL16     | DPY19L2        |
| NLRP6      | CSMD1         | RASL12   | HMG20A         |
| POLB       | LEAP2         | SSTR5    | NCOA6          |
| GNG5       | COQ4          | SLC18A1  | ZNF454         |
| KCNK2      | ZNF235        | CNGA3    | RANBP6         |
| RAB11FIP5  | CHAC1         | LRFN2    | MFSD6          |
| U2AF1L4    | ERAP2         | ABAT     | PCTP           |
| HAS2       | DENND1B       | AMIGO2   | INADL          |
| NUDT4      | ZNF554        | KCNU1    | DCHS2          |
| RNF185     | SLC25A45      | ETV7     | CCDC150        |
| MYOM3      | TBXAS1        | NKX2-4   | STARD7         |
| COX16      | VARS2         | DEM1     | HIST1H1E       |
| KLF13      | SNAI3         | CHAC1    | KDM5B          |
| PRRG1      | ALG12         | PRELP    | C20orf151      |
| TFPI2      | ZMYND15       | PTPRCAP  | TFAP2E         |
| ZBTB7A     | TNFRSF14      | C12orf26 | ZNF263         |
| TEF        | SDF2L1        | BHLHA15  | TTYH3          |
| LITAF      | PLA1A         | THBS4    | PLSCR1         |
| MPV17L2    | CADM1         | SHOX     | SAFB           |
|            | 43167 METTL18 | SLC46A3  | ANKRD13B       |
| FAM211A    | BBS4          | ASB5     | CDC42BPB       |
| FHOD3      | ITGAX         | MRPS31   | TMEM81         |
| CCBE1      | BDKRB1        | TRPV2    | TMEM5          |
| GCK        | IRF5          | SCG2     | C19orf52       |
| FAM105A    | TRAPPC6A      | CPXM2    | RP11-697E2.6.1 |
| TMEM64     | CXorf21       | CABP7    | DEPDC1         |
| LRRTM1     | WDFY4         | CNKS3    | NAT10          |
| UCHL3      | CYBA          | ZNF684   | KDM1B          |
| GJD4       | KIAA1324L     | SMAD9    | ERVW-1         |
| LEPROT     | PNPLA7        | DCX      | OR51E2         |
| AVPR1A     | JMJD5         | PPP4R4   | NOTCH2         |
| TMED5      | FAM18A        | MUSK     | ETV6           |
| TMEM43     | TRAPPC9       | MGAT4C   | UNK            |
| CNGB3      | F5            | SNCAIP   | MEN1           |
| EIF1AX     | RINL          | SCML4    | FBXO9          |
| MZT1       | CNTN6         | TNIK     | CTBP1          |
| MBD2       | NMUR1         | MORC1    | DNAJC5G        |

|                 |            |          |          |
|-----------------|------------|----------|----------|
| ATG10           | MAN2B1     | SDPR     | NFIA     |
| POLR2K          | ZNF451     | PCSK5    | LRCH3    |
| PTPLA           | CRELD2     | OLIG2    | GABRA3   |
| DUSP7           | MRVI1      | SLC38A8  | ADRA2C   |
| SP7             | CTSS       | PKD2     | LHX2     |
| VSTM4           | NLRP1      | LAMA4    | PTCD1    |
| GNG10           | TMEM88     | CAMK4    | RRAGB    |
| ETS1            | C22orf32   | CACNA1S  | FRMD8    |
| SGTB            | LIG4       | FGD3     | FAM187B  |
| BCKDHA          | CASP10     | CSF2RA   | EIF3J    |
| CADM3           | PLD3       | ZIM2     | PREP     |
| FAM214B         | C6orf108   | ELMO1    | TP53BP1  |
| RIPPLY2         | CABLES1    | CASD1    | ZNF674   |
| DCTPP1          | ITPR2      | ACTA2    | LTK      |
| SNRPB2          | TRIM13     | DPEP1    | SLC6A19  |
| ANKRD44         | CXorf57    | HMGCLL1  | JAG2     |
| IKZF3           | HSH2D      | LRRN3    | GPATCH8  |
| PRICKLE1        | PLCG2      | KCNK16   | SORBS2   |
| RP11-585F1.10.1 | ZAP70      | TNFRSF19 | COASY    |
| DOCK11          | CYP4F22    | HERPUD1  | MST4.1   |
| PRSS33          | FAM50B     | PROX2    | PHF16    |
| VPS26A          | PLCB2      | ABCA6    | PUF60    |
| TPST2           | ASB13      | CRABP1   | C17orf89 |
| UBE2A           | RCBTB2     | SLAMF1   | SLC25A39 |
| OLFML2A         | SMPD2      | NPAS4    | CSNK1E   |
| SH2B3           | NCF4       | HMCN1    | KCNJ11   |
| JPH4            | ALDH1A1    | RBFOX1   | EP400NL  |
| IL34            | GZMM       | STAT4    | TBC1D30  |
| RRAS2           | ABCA5      | FAM46C   | GINS3    |
| GOLPH3          | MS4A4E     | DHRS7C   | TRIM3    |
| C1QL3           | LMF1       | MS4A4E   | H3F3B    |
| SUB1            | IFFO1      | PDE1B    | DHX9     |
| RNF138          | PRR5       | MFSD2A   | MTMR4    |
| NLGN2           | PDE1B      | TBC1D8B  | LSG1     |
| AP3S1           | AKAP6      | FAM214A  | PHB2     |
| VEGFC           | SYN3       | TPH1     | ZC3HAV1L |
| C5orf28         | BTK        | TBXAS1   | FGB      |
| PLSCR4          | C12orf26   | KCNA3    | TSPAN14  |
| ZNF169          | C16orf95.1 | CPNE5    | VRK2     |
| FEV             | S1PR4      | FAM113B  | C20orf3  |
| ZNF585A         | FAAH2      | SETBP1   | DUSP16   |
| FAM131B         | TNIK       | FOXF2    | OGDH     |
| KIAA1143        | ICAM2      | PTGDR    | ANKRD17  |
| TP53            | ZNF775     | C22orf32 | ZNF275   |
| PAFAH1B2        |            | GIPR     | LUZP1    |
| ISCA2           |            | FAM55D   | PANX1    |
| CT62            |            | TRAPPC9  | ARHGEF19 |
| ZNF264          |            | MYO7B    | FER      |
| COL1A1          |            | CELF3    | ZNF749   |
| ST3GAL4         |            | TAGLN3   | MED13L   |

|          |                  |         |
|----------|------------------|---------|
| THY1     | GALNTL6          | SLC5A1  |
| ONECUT3  | MBP              | CALCR   |
| CLPTM1   | BRP44L           | INSRR   |
| UBE2D1   | SETDB2           | HTR2B   |
| TAF10    | GABRR3           | IRF2    |
| KCNK13   | ARHGAP25         | FAM76A  |
| GAR1     | RP11-1280I22.1.1 | UPRT    |
| C17orf74 | OR51B2           | PRDX2   |
| SRGN     | TAAR1            | TCF19   |
| SLC25A26 | CNTN6            | PLA2G4B |
| TMEM192  | PDLIM3           | CDK2    |
| ELOVL2   | PLA2G12B         | ZKSCAN3 |
| HRH1     | ATP1A4           | CLDN6   |
| PDPK1    | TRIM39-RPP21     | CDH1    |
| CHRA1    | COL25A1          | SRRD    |
| FJX1     | CCKAR            | ANKRD56 |
| GZMK     | CLEC3A           | ZNF41   |
| PABPC3   | NFYC             | CDX2    |
| ROR2     | KCNA6            | SNX4    |
| APOBEC3D | PNOC             | C9orf86 |
| ZDHHC8   | HSD11B1          | SRP68   |
| SLC39A10 | LMF1             | PCDHA11 |
| S100A2   | SMPD3            | CREB3L2 |
| UBAC2    | SMAP2            | HELQ    |
| ETHE1    | RINL             | FKBP4   |
| CLIC4    | LEPR             | GLYATL3 |
| B4GALT1  | SPATC1           | ANLN    |
| RHOA     | HEPH             | MGAT5B  |
| KLRD1    | PNPLA7           | TRPC4AP |
| ZFAND1   | DDC              | PTPN13  |
| UBXN6    | UGT2B4           | C9orf7  |
| SEC24A   | SERPINF1         | ODF3    |
| COL6A2   | KLHL6            | FAM83D  |
| M6PR     | CLEC1B           | NAT9    |
| TMEM9B   | TMEM59L          | TUBA1B  |
| PTP4A2   | DOK3             | CABLES2 |
| RBMS3    | OR7C1            | PDE4D   |
| QSOX2    | KCNQ4            | ATP6AP1 |
| C1orf21  | HAND2            | EEFSEC  |
| SLC30A5  | C8orf47          | RPH3A   |
| TGFB1    | IPO8             | UCHL5   |
| GLS      | NRCAM            | EPT1    |
| NSA2     | FAM189A1         | TRIM37  |
| TUBA4A   | ELN              | TBC1D7  |
| MMP14    | ACCN1            | BSDC1   |
| C16orf72 | KRT40            | KIF14   |
| PTF1A    | KCNJ3            | FAN1    |
| FAM132B  | OR2L13           | ZBTB9   |
| PPP1R11  | ITPR2            | SRP14   |
| ZNF527   | PDK4             | KLHL36  |

|         |       |                |                 |
|---------|-------|----------------|-----------------|
| ANKRD40 |       | CD79A          | ZNF490          |
| ELFN1   |       | LPXN           | CFL1            |
| AKAP2   |       | NLRP14         | USP36           |
| GJC1    |       | CACNG5         | NR4A1           |
|         | 43160 | ITGB7          | MMS22L          |
| GJA3    |       | AKAP6          | PLD5            |
| ODZ3    |       | CRYBA4         | COPG2           |
| STIM2   |       | PDZRN4         | COPG2           |
| TGDS    |       | FGD2           | ACAA2           |
| NR3C1   |       | BTBD17         | KLHL25          |
| ZNF580  |       | CD101          | PLCXD1          |
| CPS1    |       | GPR15          | CSH2            |
| NUPL1   |       | SEC11C         | C1orf109        |
| C1orf49 |       | TMEM119        | CLINT1          |
| RPL37A  |       | RASAL3         | TAF2            |
| CD3G    |       | NKX6-3         | SEPSECS         |
| RECK    |       | TLR6           | ARID4A          |
| ARL8B   |       | PDGFRA         | NEB             |
| NXN     |       | FCGR2B         | MAGEF1          |
| NUDT11  |       | ENTPD1         | MUTED           |
| GOLT1B  |       | DERL3          | TRERF1          |
| FAM92A1 |       | RCBTB2         | CSNK1A1         |
| GNAQ    |       | ZNF775         | IMPA1           |
| FAM102A |       | CNTN4          | HNRNPF          |
| SLC15A4 |       | TBX5           | RSRC2           |
| SLC38A5 |       | RP3-412A9.11.1 | MLL             |
| RAB2A   |       | RAB3C          | ZWINT           |
| EPN2    |       | AMPD1          | SURF6           |
| TSPAN5  |       | PLEKHO1        | RP11-565P22.6.1 |
| C9orf89 |       | FLT3LG         | PVRL4           |
| SPRYD7  |       | C16orf95.1     | FGD1            |
| CNOT7   |       | LPL            | BAIAP2L1.1      |
| FHL2    |       | OCM            | ZNF736          |
| ZNF141  |       | ASB13          | GNB2            |
| CCNI    |       | SLITRK2        | SLC7A5          |
| IL11    |       | KCNJ16         | HOXC11          |
| MRPS36  |       | KCNC4          | CAPN13          |
| CTDSPL  |       | ANAPC4         | ARHGEF6         |
| FAM210A |       | GNLY           | ARNT            |
| WASF2   |       | OSR1           | NCAPD3          |
| EHD1    |       | CXorf57        | SUDS3           |
| PGRMC2  |       | CLEC10A        | ELAC1           |
| CHM     |       | FOXF1          | PHLPP2          |
| TTC24   |       | APOB           | MYO1G           |
| NDST3   |       | GPR114         | TBRG4           |
| ZIC5    |       | DUSP26         | NUFIP2          |
| C3orf70 |       | NCF4           | SAP30BP         |
| SLC38A2 |       | PMEL           | ZNF136          |
| LAPTM4A |       | P2RX1          | PSRC1           |
| WIPF1   |       | KIAA1755       | POP4            |

|           |          |              |
|-----------|----------|--------------|
| CCDC117   | CD1D     | KIF2C        |
| QRICH1    | RUNX1T1  | ABCA12       |
| PWWP2A    | FMO2     | FIGNL1       |
| CA1       | DENND1B  | ANKIB1       |
| YAP1      | FGF9     | POC1A        |
| SLC23A2   | ABCB1    | PDDC1        |
| CRIM1     | ACAP1    | ONECUT2      |
| SLC36A1   | TXLNB    | PRKG2        |
| CDC42EP2  | S1PR4    | PRSS46       |
| MNT       | SLC24A3  | ISOC1        |
| VGLL4     | CDC42EP5 | CASP6        |
| SBDS      | SLC35D3  | CGNL1        |
| CALHM2    | EPHX2    | TEAD1        |
| SNRPD1    | ANK2     | PAK1         |
| ELK3      | ASMT     | METTL13      |
| FOXP1     | RCBTB1   | ASAP2        |
| SEH1L     | KCNK17   | QDPR         |
| TNFRSF11A | HGF      | ZNF193       |
| TSSK2     | IFFO1    | SLCO5A1      |
| P4HA3     | SMCHD1   | ILK          |
| SP9       | CYP4F22  | PSMA7        |
| FBLN2     | TSPAN11  | PLA2G4A      |
| IL7R      | PTPRN2   | MED13        |
| HINT1     | C7orf58  | TFAP2A       |
| COX6C     | BIN2     | KHK          |
| UBE2R2    | LCN10    | RABGAP1      |
| ASAP1     | MATK     | ZSCAN30      |
| LACTB     | RAB33A   | RALGAPA2     |
| ERBB2IP   | ABCA9    | NCAPD2       |
| UBE2D3    | NLRP1    | GPR98        |
| EIF1      | ICAM2    | AC005726.6.1 |
| SSR3      | SYN3     | MON1B        |
| NRM       | AMICA1   | ZAR1L        |
| ANKRD57   | F5       | SPEG         |
| BTF3      | KIAA1024 | CCDC97       |
| RAB39A    | MRVI1    | MALT1        |
| TBC1D20   | FLT3     | DHPS         |
| CRLF3     | GZMM     | CHEK1        |
| PCBP3     | ARHGAP15 | PLCZ1        |
| FAR2      | ARHGAP15 | ORMDL3       |
| MAF1      | WISP2    | AP1G1        |
| ZIC2      | TBC1D10C | MYO6         |
| NPBWR1    | CXorf21  | DOT1L        |
| RNF38     | BTK      | HNRNPU       |
| MAX       | HSH2D    | NSMAF        |
| GPC6      | SSR4     | SLC5A12      |
| HEG1      | SNAI3    | RELT         |
| ZMYM5     | NAA16    | PAQR4        |
| SEMA7A    | ZAP70    | ATP2A2       |
| TXNL1     | WDFY4    | DRP2         |

|               |          |
|---------------|----------|
| EMR2          | RASA1    |
| TMEM41B       | SH3GLB1  |
| ITPRIP        | OR2J3    |
| UBE2E1        | FBXO22   |
| IGF2BP2       | LAMTOR1  |
| C22orf39      | FLOT1    |
| DNAJB5        | NDUFS2   |
| GCLM          | POU5F2   |
| ELL           | FARS2    |
| C10orf122     | SNUPN    |
| PSMD8         | TBCCD1   |
| ZFAND3        | SIVA1    |
| RAB33B        | ONECUT1  |
| E2F5          | COPS7A   |
| UBE2B         | ZNF346   |
| NAF1          | USP13    |
| IFFO2         | PVRL2    |
| PSMF1         | WNT3     |
| TLR9          | BDKRB2   |
| RBBP9         | SEC14L1  |
| ISCU          | HEBP1    |
| PPP6C         | ESCO2    |
| FKBP5         | CASC3    |
| MAG           | TCEB3    |
| GAS2L1        | PPM1G    |
| TMED7-TICAM2  | TMED9    |
| C7orf73       | RIOK1    |
| VGLL3         | PSPC1    |
| NDFIP2        | PRUNE    |
| NDRG1         | ZBTB5    |
| CHCHD4        | MLIP     |
| KDSR          | ZDHHC18  |
| IKZF5         | SERINC5  |
| SURF4         | POM121   |
| FAM164A       | ERAL1    |
| KLF16         | CNDP2    |
| ZFPM2         | FAM190A  |
| RNF112        | TTLL2    |
| C9orf41       | SLC39A9  |
| GLI3          | BTN2A2   |
| TM2D2         | ZNF117   |
| NCS1          | DGKH     |
| FAM122A       | HIF3A    |
| MAP7D1        | C9orf150 |
| CD44          | CSDE1    |
| MAPK7         | WWP2     |
| NCOR2         | ZNF124   |
| MEF2BNB-MEF2B | SMARCC1  |
| SF3A1         | USP42    |
| ZNF706        | FASTKD2  |



|          |          |
|----------|----------|
| NDUFB5   | HTATSF1  |
| TMEM19   | LRRC31   |
| ZMAT3    | C3orf33  |
| RHOBTB3  | TROAP    |
| EFHA2    | C9orf100 |
| TRIM7    | OLIG1    |
| TAF3     | DCAF12   |
| ZNF699   | SNRNP200 |
| MFSD5    | FTSJ3    |
| PCDHGC3  | SRSF2    |
| OGFRL1   | MAML3    |
| C4orf43  | FAM171B  |
| ADO      | ADAMTS7  |
| SLC7A7   | FBRSL1   |
| RAB43    | C1orf131 |
| TLN1     | TGFBRAP1 |
| STK10    | B4GALT2  |
| ASPHD2   | MRFAP1   |
| KIAA1644 | MIER3    |
| MCTS1    | SLTM     |
| TNFRSF1A | ZNRD1    |
| ANKH     | RNF19A   |
| SLC37A2  | GPN1     |
| TMEM239  | ZCCHC6   |
| ZNF283   | TMEM170B |
| KAT6A    | UFSP2    |
| DNAJC18  | ELF3     |
| CRX      | CYP19A1  |
| GATAD2B  | MPZL1    |
| VCPIP1   | SBK1     |
| FPGS     | SSR2     |
| C6orf57  | GTF3C2   |
| MTDH     | ZNF786   |
| KCTD17   | MYH13    |
| TMEM38B  | DDX11    |
| GFPT2    | SKAP1    |
| GPR153   | EXO1     |
| TRPV3    | CARS     |
| ZNF805   | KRTAP2-4 |
| CLDND1   | UBN1     |
| HIPK3    | MAD2L1   |
| PFN1     | HNRNPA3  |
| LYSMD3   | FAM126B  |
| FAM25E   | DSP      |
| RPS27L   | RAB19    |
| ELF4     | CENPM    |
| CDRT1    | RORB     |
| MRP63    | XIRP1    |
| TPM4     | CIAO1    |
| ARL6IP6  | TNPO3    |

SERPIN8  
COTL1  
KLF12  
LRP12  
NOL9  
OLFM1  
ZDHHC20  
FKBP1C  
RHOG  
SHB  
MKKS  
RP1-130H16.18.1  
PBX3  
SPCS1  
TMEM55A  
DNAJC25  
SNX12  
CTDNEP1  
LRRC38  
RAB8B  
TRIM35  
KLHL33  
DAZAP1  
DCUN1D5  
TMEM194B  
GNAI2  
NFIB  
C22orf13  
CIC  
KLF9  
FNDC8  
PINK1  
C5orf62  
DERL1  
ZFC3H1  
ACTB  
RAB28  
PCNP  
FAM126A  
COPZ2  
PPRC1  
FSCN3  
FBXL20  
USP22  
C5orf41  
RAB21  
MTX3  
C17orf107  
JKAMP  
OTUD4

BORA  
DBF4  
TECPR1  
THOP1  
H3F3A  
SV2C  
CAPN5  
NPEPPS  
C2orf68  
RPIA  
ILF2  
LDOC1L  
DMRTC2  
HNRNPA2B1  
NKRF  
ZNF227  
AURKA  
STX19  
RABIF  
CHCHD2  
FAF2  
RP5-1086D14.3.1  
ATF7IP  
LLPH  
TLL2  
ATF6  
DMBX1  
ALKBH4  
NSRP1  
ATP8B1  
STIM1  
SCO1  
SLC5A9  
C10orf113  
PPP2R1B  
E2F2  
COMMD2  
TMEM44  
CDYL  
TTF1  
RAE1  
DENND5A  
FNTB  
CDCA4  
MTMR1  
SLC25A3  
DOPEY2  
FZR1  
MBOAT1  
GALNT7

|                 |          |
|-----------------|----------|
| FAM57A          | TCF3     |
| EI24            | TMEM194A |
| TPP1            | GLYCK    |
| CBL             | SEMA4B   |
| TRAM2           | MYLK2    |
| SLC39A14        | ABCC8    |
| MAGOHB          | NIN      |
| CMC1            | ERCC6L   |
| LSM12           | RFC1     |
| RASSF8          | SWAP70   |
| CMTM6           | TSR2     |
| RP11-463D19.2.1 | HSD11B2  |
| CHAMP1          | PRMT3    |
| PDP1            | ACP2     |
| CLIC1           | BECN1    |
| TCEB1           | GPATCH4  |
| SGCE            | SCD5     |
| LAMP1           | RRP36    |
| DPYD            | FUNDC2   |
| TMEM200A        | ADAT3    |
| EXT1            | ZP1      |
| SERTAD2         | C11orf30 |
| ERH             | KLHL7    |
| MUL1            | AGGF1    |
| ZDHHC3          | COMMD9   |
| DHFR            | PRDM9    |
| RPL35A          | CAB39L   |
| MRPS18B         | VPS18    |
| ITGAV           | NUP62    |
| LMAN1           | SOCS6    |
| PABPC4L         | ZNF655   |
| ABLIM2          | OR56B4   |
| PHF23           | HAUS3    |
| C14orf129       | MARK1    |
| POLK            | RBM46    |
| C13orf33        | HYAL2    |
| BAG3            | MELK     |
| STAM            | C12orf73 |
| NR1D1           | NLE1     |
| PITPNB          | C11orf84 |
| ST3GAL1         | MTO1     |
| CTDSP2          | GPR77    |
| MMGT1           | LYSMD1   |
| FAM110B         | CDKN1C   |
| C1orf144        | C15orf23 |
| FKBP1A          | PLEKHF1  |
| CCDC71L         | CEP78    |
| NRIP3           | GMNN     |
| COX7C           | REST     |
| FOXK1           | SNX1     |

|          |          |
|----------|----------|
| C9orf3   | MRPS7    |
| UST      | BET1L    |
| CADPS    | ORMDL2   |
| CHST2    | USP10    |
| LYRM4    | HMGN1    |
| OLFML3   | EWSR1    |
| ZNF395   | HTRA2    |
| SAMD4B   | THUMPD3  |
| CSNK1G3  | TRAF6    |
| ACER1    | MAPK6    |
| CPE      | SPRYD4   |
| BNC2     | CTCF     |
| TMEM209  | NPLOC4   |
| KPNA3    | ZNF121   |
| DSE      | NRSN1    |
| DGCR2    | TMEM183A |
| ABCE1    | ABHD16A  |
| RGP1     | MEST     |
| FRMD6    | DBF4B    |
| DUSP5    | C15orf52 |
| SHISA5   | CCNO     |
| TMEM186  | CYP2C19  |
| C4orf3   | CA5A     |
| SUFU     | ERMAP    |
| SSH1     | KDM1A    |
| GFER     | MRPS10   |
| RAP1B    | LRRC57   |
| GNA11    | GUCA1B   |
| UBE2G1   | ZNF215   |
| ATF7     | ZDHHC5   |
| TMBIM1   | DCAF7    |
| LIN7C    | H2AFY    |
| IP6K1    | CHD6     |
| OR13J1   | TJP2     |
| WASL     | BEST3    |
| LASP1    | KAT7     |
| PLSCR3   | RRP15    |
| BICD2    | PRSS22   |
| FAM49B   | EIF3F    |
| MEX3C    | XAGE3    |
| LRRC3C   | NMD3     |
| APOBEC3C | ACTL6A   |
| CENPB    | RAD51AP1 |
| CCDC80   | TBP      |
| TMEM39A  | MMP26    |
| TRPA1    | PLK4     |
| C6orf48  | FAM171A2 |
| SYT14    | PRKAG3   |
| MAP1B    | OTOG     |
| UBE2I    | RFC4     |

|                |          |
|----------------|----------|
| C4orf46        | CPSF4    |
| NUDT19         | TSPAN17  |
| GNG12          | CNBD1    |
| C12orf66       | STRAP    |
| EPHA6          | MARCKSL1 |
| ABTB2          | AP1B1    |
| PHF21A         | ATP6VOD1 |
| C12orf23       | PRR20E   |
| MED22          | DLST     |
| PICALM         | STIP1    |
| TSHZ1          | ILF3     |
| TMX2           | FGF12    |
| DPY19L1        | PDZD4    |
| GNA12          | LBR      |
| SRRM3          | BTBD3    |
| TIMM22         | C4BPB    |
| KLF7           | ALS2     |
| USP14          | WDR76    |
| NDFIP1         | 43166    |
| AKIP1          | NEK2     |
| SLC25A24       | PRDM12   |
| CSNK2A1        | CDHR2    |
| ST5            | GIT2     |
| HERPUD2        | TTI1     |
| DR1            | C17orf63 |
| ZBTB25         | CPSF2    |
| TRA2A          | SMOX     |
| GARNL3         | EIF1AD   |
| ZDHHC2         | VSTM5    |
| PTBP3          | ADAM29   |
| CDR1           | LSM7     |
| WIPF2          | CDC27    |
| PANK2          | CNOT6    |
| AKT2           | VAPB     |
| NXT1           | PLEKHA8  |
| HM13           | DBNL     |
| CYB5B          | FNBP1L   |
| C11orf24       | SDAD1    |
| KIAA0930       | ALX1     |
| MAF            | WDFY1    |
| PJA2           | SNX11    |
| KLF10          | CACNB3   |
| BLOC1S3        | TDG      |
| NANP           | PUM1     |
| STK32B         | APOA2    |
| IL17RA         | NSUN3    |
| RP1-239B22.1.1 | ARHGAP10 |
| KIAA0355       | ZNF154   |
| ASB14          | KSR1     |
| ACTR10         | C12orf45 |

|          |                  |
|----------|------------------|
| CMTM7    | ARHGEF5          |
| ATP6V0E1 | NAV1             |
| IPO11    | STARD3           |
| TUBB6    | HOMER1           |
| PTP4A1   | FRMPD3           |
| MTPN     | MCM10            |
| ZFP91    | TMED8            |
| GIN51    | ZNF510           |
| RAB5C    | ARF6             |
| EFHA1    | WDR45L           |
| LAPTM4B  | JARID2           |
| KCNIP3   | ZSCAN21          |
| ZNRF2    | RNF168           |
| PACRGL   | RP5-1187M17.10.1 |
| SETD7    | SPINT1           |
| ZNF260   | LMBR1L           |
| SLBP     | HIPK1            |
| FBXW5    | TMEM235          |
| CENPH    | WDR41            |
| HOXD8    | DHX29            |
| NDEL1    | TUBA1A           |
| GNPDA1   | ZCCHC12          |
| MAPK1    | MYH2             |
| MTMR6    | HUS1             |
| PRNP     | WDR61            |
| SH3PXD2B | WDR61            |
| SMN2     | PIPOX            |
| RAB35    | TERF2            |
| ANP32B   | WIPI1            |
| C7orf42  | MANBA            |
| GNAI1    | LGI2             |
| SEC24D   | SSRP1            |
| CRKL     | C1orf105         |
| PAWR     | KRTAP10-10       |
| UBQLN2   | SPTY2D1          |
| EPC2     | SIN3A            |
| ELMOD2   | EXOC4            |
| GNRHR    | EXOC4            |
| SPHK1    | ACBD3            |
| PGBD5    | CDC42SE1         |
| SPPL3.1  | UNC93A           |
| MAML1    | ATG9A            |
| NDST1    | DKC1             |
| NDST1    | HDAC8            |
| AMPH     | TRIM33           |
| DCAF16   | DHX15            |
| ZNF70    | PTGES3           |
| LIN52    | KIAA0226         |
| MAVS     | DOHH             |
| DCLK1    | ING1             |

|          |                |
|----------|----------------|
| TCP11L1  | FOXP4          |
| FAM83G   | SYT16          |
| ABL1     | POMT2          |
| CDK14    | CEP76          |
| C14orf43 | YWHAG          |
| PPIA     | USP9X          |
| STK35    | RNF180         |
| CPOX     | ZNF330         |
| KLF11    | SKIV2L2        |
| GORASP2  | UBQLN3         |
| C18orf25 | SDK1           |
| SMN1     | IWS1           |
| MAST4    | DEDD2          |
| AFAP1    | SLC6A5         |
| PSME3    | C2orf63        |
| DEPDC7   | GFM1           |
| A2LD1    | VANGL2         |
| LRRC8A   | ABHD2          |
| SMG9     | CSTF2          |
| DUSP1    | FCHO2          |
| FAM19A2  | TCP10L2        |
| OR5C1    | DTNB           |
| RFC3     | LYSMD4         |
| ATP6V1G2 | GLOD4          |
| PITPNA   | CTC-435M10.3.1 |
| PHF12    | SETD5          |
| YTHDF3   | UPF3B          |
| ABI1     | POLR2G         |
| KCNQ5    | MTRNR2L7       |
| ME2      | CIDEC          |
| KIAA1967 | CTTNBP2NL      |
| YEATS4   | BAZ1B          |
| CACNA2D1 | ADAM22         |
| LCORL    | BPTF           |
| TFDP1    | DOK6           |
| RNF144A  | FOXN3          |
| INPP1    | ABHD15         |
| UBTD2    | ST13           |
| ATP5SL   | LEO1           |
| UBE2Z    | ACO2           |
| TXNL4A   | C6orf47        |
| FXR2     | RTTN           |
| C19orf10 | STMN1          |
| ATP13A3  | WDR7           |
| TPGS2    | C12orf34       |
| CDS2     | CLDN20         |
| SCAMP1   | VIL1           |
| IGF2BP3  | EZH2           |
| FAM108B1 | TOPBP1         |
| SDCCAG3  | C12orf48       |

C19orf47  
PCBP2  
SUN2  
C5orf43  
CRK  
RIN2  
ACOT7  
ERGIC1  
PHC3  
RMI1  
GSK3A  
BMP1  
RNF4  
B4GALT2  
SWAP70  
SMAD4  
CHTF8  
LRFN3  
ATF6B

RAD54B  
TDRD1  
HNRNPL  
PCLO  
PPP1R14D  
DHX8  
PRRC2C  
GNL3L  
PLEKHA6  
TTK  
SPAM1  
HELZ  
IPPK  
CENPF  
WDR67  
SLCO4C1  
UBE2T  
LY75-CD302  
UMODL1  
MUM1L1  
TNPO2  
FBXO28  
ACCSL  
TES  
GTPBP2  
RTKN2  
FREM1  
PRPSAP2  
SIX4  
ZNF197  
SYNGR4  
KIAA0922  
NOS1AP  
RP11-831H9.16.1  
CASP2  
MTHFD2  
C6orf223  
DCAKD  
NAA38  
ATCAY  
FAM55A  
UNC13C  
TPBG  
PPA2  
PKD1L1  
LHX9  
ANP32A  
SMAD4  
UBE2O  
NEIL3



CEL  
PYGO2  
GRIK3  
NIPSNAP1  
ARMC9  
PHB  
THEG  
KLHL28  
FECH  
INPP5E  
NSUN4  
PRDM4  
TEX2  
ATRX  
SLC17A3  
BYSL  
FUBP1  
TUFT1  
RFC2  
NEDD4  
GPR125  
KLHL20  
USP3  
HCLS1  
ARHGAP11A  
H2BFS  
SHMT2  
CLP1  
KCTD10  
SREK1  
LRRC16A  
GNRH1  
RGS12  
MAP1LC3C  
PPP2R2B  
VANGL1  
RPAIN  
HUWE1  
IGSF3  
SRRM1  
ARL17A  
CKM  
ARMCX3  
CHTF8  
MED20  
MAGEC3  
DTYMK  
HNRNPA1  
SLC39A7  
NCAPG

RDX  
CDKN2D  
CEP135  
NR1I3  
CDK13  
NR1D2  
SLC35B2  
AIMP2  
OR4A47  
HOXC6  
ZNF311  
KCTD2  
ABT1  
ING3  
DHRSX  
LRFN3  
FFAR3  
CDK12  
KDR  
NUP85  
TRIM5  
GUCY1A3  
SLC1A2  
MYLIP  
SSBP2  
LSM14B  
DPH1  
EDDM3A  
BIRC5  
GRM4  
AGXT2L1  
USP47  
SLC25A11  
KRBA2  
OPA1  
INPP4B  
AFP  
C17orf80  
TSG101  
CHD4  
HSPA8  
ZFYVE1  
TRIM24  
FAM134A  
EHD3  
HES1  
FRMD5  
NFE2L1  
KIAA0100  
SMARCD1

RP11-528L24.3.1

PAF1

RACGAP1

MURC

WHSC2

PCDHA5

BZW2

NAA40

SCAND3

PCSK9

FAM55B

FAM123B

KRTAP10-3

SPOCK3

GPN2

LHFPL3

RAD21

IP6K3

FRK

DTNBP1

DSCR3

ZXDC

OR10G2

KRT33B

PRSS1

PHIP

KRTAP1-4

RALY

C12orf40

PROZ

FZD1

PKP3

SFXN1

ATXN7L1

PGM2L1

MTUS2

GPX6

CLVS2

RP11-463C8.4.1

XAGE5

HTR1E

LRRC53

OR2B11

OR51F2

AWAT1

OR4D11

KBTBD5

OR7E24

OR10P1

GHRH

OR1L3  
OR10K2  
MEPE  
OR51S1  
LGALS13  
GPR148  
PRSS48  
CTD-2140B24.4.1  
HSFY2  
PTH  
TMEM207  
FABP12  
PDHA2  
NPBWR2  
MAGEB1  
DCAF8L1  
GABRA6  
MT4  
BMP10  
KRTAP12-1  
C13orf44  
ODF4  
HTN3  
KRTAP4-4  
G6PC  
RBMXL3  
SYNE2  
SYNE2  
OR52R1  
RP1-317E23.6.1  
DPPA3  
C7orf62  
OR51G2  
EBLN1  
RP13-512J5.1.1  
RP11-343C2.3.1  
SPHKAP  
C10orf126  
USP26  
ACCN5  
PRM3  
YIPF7  
CCDC105  
SLC13A2  
CELA3A  
C7orf34  
POTED  
OR51A7  
ZFP64  
GPR151

TAF1  
PRKD1  
MKI67  
FMR1  
SPAG5  
HCFC1  
HERC2  
ZNF543  
UTP18  
C15orf63  
DHX40  
ZNF404  
SI  
IFI16  
YLPM1  
IMPG2  
KRTAP2-2  
HYAL4  
BRDT  
AMMECR1  
LETM1  
CCNB1  
CDKN2AIP  
KIAA1919  
SESTD1  
C2CD3  
PARP1  
RANGAP1  
TAS2R38  
PAGE1  
CCDC109B  
B3GAT1  
ESPL1  
RGS7BP  
WNT10B  
SMPD1  
NAALADL2  
PSMD2  
RNFT2  
RNF217  
EIF4ENIF1  
POLR2F  
FAM18B2-CDRT4  
DSG2  
BAK1  
SNRNP40  
ZNF714  
FXR1  
ISX  
MYH9

CTNNB1  
SRBD1  
GPSM2  
PPP2R5D  
PSMD10  
RP11-529K1.3.1  
DEFB4A  
MLF1IP  
ATXN7L3  
SPP1  
ZNF486  
SLC24A5  
DDX3X  
SLC35A2  
LDOC1  
ST14  
ARHGAP19  
KCNJ1  
HNRNPH1  
PCDHA7  
PABPC1L2A  
LIG3  
MCM7  
DRD2  
TUBG1  
CTNNA2  
EXT2  
HELB  
SEC24B  
FBXO5  
TRIM56  
CTXN3  
SLC25A2  
C15orf44  
BACH1  
CENPL  
GPRC6A  
ZNF384  
ZFYVE19  
CDCA8  
MID2  
PPP1R37  
POLDIP2  
SNAPC5  
PRPSAP1  
ZBED6  
SMUG1  
KIAA0586  
FAM106A  
RAD54L

LRRCS9  
HIF1A  
HIF1A  
RIPK4  
DLGAP1  
PRR19  
SLITRK6  
GPRASP2  
PAK1IP1  
CCDC137  
ZNF24  
TMEM210  
DICER1  
RNF34  
ZNF609  
SNX13  
HFE  
DUSP12  
RCC1  
GLRB  
DTNA  
CAND1  
PA2G4  
UGT2B7  
NARS  
NUP188  
GRSF1  
PGK2  
TNFAIP1  
ZBED4  
QSER1  
C6orf106  
TMEM89  
SRC  
CCNE1  
NKIRAS2  
TACC3  
SMAD2  
TMCC2  
TOMM40L  
KANSL2  
RIC8B  
TRIM61  
C1orf111  
SIKE1  
CSNK1D  
CKAP5  
VPS53  
SPTBN2  
NUDT1

SLC35E2  
HJURP  
ZFP92  
SCFD2  
EIF4G1  
PABPC1L2B  
ADAM20  
BRCC3  
DLGAP5  
LHX8  
ABP1  
DDX5  
CDK16  
SLFN11  
TIMM21  
SRP72  
SENP5  
DGKB  
STK16  
NAP1L4  
TSTD2  
CRAMP1L  
GYPB  
TMEM199  
HOXC12  
WBP11  
PTPLAD1  
SUV39H1  
PHLDA2  
OCRL  
HECW2  
RAP1GDS1  
FOXK2  
AP1S1  
FOXO6  
JMJD6  
BAZ2A  
MECP2  
H2AFX  
PCNA  
EGLN3  
SLC25A44  
ZSCAN23  
FN3KRP  
ZNF331  
SRSF1  
CMAS  
MGA  
KIAA0317  
F2RL1



FZD2  
MAGED1  
FBLN7  
CWF19L2  
LRP5L  
FAT1  
ZNF398  
SLC15A2  
VPS25  
MTA2  
GPRC5D  
HNRNPH2  
EYA1  
SOX4  
KRTAP2-1  
ACVR2B  
TACO1  
LNX1  
IMP3  
UQCDFS1  
ANAPC11  
KIAA1549  
XRCC2  
SMG8  
RAD51B  
CDCA5  
C11orf58  
SVOP  
SVOP  
CPA1  
MED24  
HTR3A  
DIS3L2  
RRM1  
ANP32E  
RNASEH1  
CDC7  
DAND5  
YTHDF1  
TG  
ACSL1  
POLR1A  
LIMK1  
CORO2A  
BPIFC  
HSP90AA1  
NIF3L1  
RPRM  
NFYA  
BARX2

ATF6B  
SYNJ2BP  
RBMX2  
ULK1  
TK1  
UGT2B15  
SLFN5  
ZNF746  
COPS7B  
ZNF184  
SMARCA4  
NUSAP1  
CACNA1E  
MYO1B  
TEX19  
NAP1L6  
RIC8A  
SLC25A5  
ERV3-1  
C14orf118  
C6orf62  
BRAF  
RNF44  
TRAFD1  
TCN1  
HMGB2  
RBM12  
PBK  
AL137798.1  
NCAPG2  
SP4  
AC069257.9.1  
RP11-182J1.16.1  
HBP1  
IQGAP3  
PEX14  
CANT1  
GNB1  
CHST10  
TTC19  
SLC22A14  
GRB10  
ZNF232  
TMEM206  
MCM8  
TMEM179  
DPP3  
EPHB3  
FITM2  
DNAJB6

HBM  
RGPDI  
CCDC47  
TIPIN  
CCDC144A  
VPS37D  
CABP4  
C11orf46  
FRS2  
GALNT1  
KRTAP5-1  
CTR9  
RAD17  
HMGCR  
PLXNA3  
GEMIN2  
PLEKHG3  
TROVE2  
JAK1  
ARL13A  
RPAP1  
MAPKAPK5  
NSF  
CHRNA7  
CHRNA7  
TRMT2B  
EXD1  
RAD54L2  
EML4  
YWHAQ  
AFM  
HP1BP3  
RP9  
SLC25A15  
KIFC1  
C15orf42  
BRCA1  
HUS1B  
FBXW11  
EFTUD2  
PAFAH1B1  
FLVCR2.1  
CHST6  
DDX23  
ZNF143  
GRM3  
ARHGAP11B  
GSG2  
E2F1  
TWF2

CDCA3  
APP  
SLAMF9  
RBM11  
TRIM68  
HOXB13  
ZNF397  
TBC1D22B  
C9orf102  
SCRN3  
NFKBIL1  
C11orf94  
DISC1  
GSTCD  
XRCC5  
PRR14L  
TRAPPC10  
AAMP  
DCAF4  
MDC1  
OTUD7A  
NUDCD3  
MRPL10  
IGSF1  
CHST1  
NUF2  
MDH2  
UBTF  
FOXJ3  
STYK1  
WRNIP1  
MCM3  
LMNB1  
DOCK8  
ZNF641  
AUTS2  
ANKRD11  
ARID1A  
PDAP1  
TMEM150C  
LDB1  
TPM1  
GOLGA8H  
SVIL  
SEMA3A  
FBXO3  
USP49  
LANCL3  
MED1  
HSPA6

FEN1  
MRPS27  
KIAA1267  
TFCP2  
CKAP2L  
AP000721.4.1  
ENTPD7  
CNTN2  
LGALS9  
GTF2H1  
ADCY5  
SMARCD2  
TNFRSF11B  
KLHL23  
MEX3A  
FNBP4  
BTBD10  
MOB2  
YTHDC1  
SYT1  
ZZZ3  
C16orf59  
LMBR1  
SIX1  
TIMELESS  
ANKS1A  
ZSCAN10  
RGS16  
SLC29A4  
RP11-332019.5.1  
HNRNPR  
AMPD3  
PTGES2  
PITPNM2  
C12orf51  
C17orf85  
WDR82  
SAAL1  
FOXM1  
TEAD2  
HIRA  
RNF216  
PARVA  
PIF1  
RNF121  
GRK6  
ZNF669  
FAM84A  
MAP2K6  
C20orf72

E2F3  
DLG3  
MICB  
FAM5B  
TMEM48  
GTPBP1  
NEO1  
RBBP8  
RBBP4  
BUB1B  
HSPA1B  
SLC35G1  
TCF12  
PCDHA9  
CSRP2BP  
ERCC8  
RGP4  
SPATA5  
BBOX1  
ZNF318  
NEURL3  
GZF1  
BCL7A  
SNRNP48  
PFKFB3  
B4GALNT4  
CREB1  
PLA2G3  
TSPYL5  
ARHGEF2  
OR10A2  
PSMD3  
CCNB2  
TJP1  
RNF20  
B3GAT3  
GINS2  
SEC23B  
UGT2B11  
GNAI3  
MCPH1  
SPECC1L  
TRIP12  
NEK6  
IVNS1ABP  
ATL1  
AC078802.1  
TSPAN12  
UTP23  
H2AFZ

ZNF827  
RPA1  
ACPL2  
CXorf40B  
RBP1  
HSPA1A  
CLDN24  
TASP1  
KDM6B  
NAGK  
TP53BP2  
RNF220  
WDHD1  
RCC2  
DMRTA2  
DNAJB1  
OR51Q1  
GLYATL2  
ISG20L2  
WHSC1  
ZNF343  
VAX1  
CNOT2  
UBL4A  
RP13-395E19.1.1  
INCENP  
NONO  
HOXD12  
SOCS3  
C17orf64  
KDM2A  
KRTAP4-2  
IGDCC3  
IP6K2  
PEX5  
FAM59B  
SLC19A2  
ACLY  
HARBI1  
SLC4A11  
ECT2  
TGIF1  
FZD5  
AMBRA1  
ABCG1  
ANKRD32  
AMMECR1L  
BMF  
LINGO1  
WARS2

NUP153  
GTF3C5  
ZNF576  
GADD45A  
AACS  
PHRF1  
ZNF284  
MCM6  
43352

ADNP2  
SIPA1L2  
MAGED4  
PRPS2  
TNPO1  
CENPI  
CBX2  
TAOK1  
C9orf129  
BAZ2B  
BST1  
SRSF3  
MAGED4B  
ZNF71  
MFAP1  
TRIM14  
FAM193A  
ZNF74  
UBR1  
TP53INP2  
GPKOW  
NGGT1  
UBR7  
USP32  
MCM5  
HDAC2  
ZBTB22  
MARK2  
SSH2  
POLA2  
FSIP2  
SPC24  
SMC1A  
KIF4A  
SOX2  
ZBTB39  
IRF2BP2  
GOSR2  
DCAF4L1  
FAM111B  
CHMP4B



EME1  
CADM2  
NFATC3  
APOBEC3B  
LPIN1  
DHX36  
AAGAB  
MGST3  
MGST3  
OBFC2B  
MAD2L1BP  
TMEM144  
CAPRIN1  
BARD1  
CEP68  
INO80  
FRMD7  
NUP98  
C9orf69  
RNF182  
SOS2  
SART3  
SBF2  
FAM78B  
CD82  
PTMA  
TGFA  
SRGAP2P2  
POU4F3  
ZADH2  
PGBD1  
ZNF648  
EIF5  
DCTN2  
PRDM5  
PJA1  
BLMH  
CASP3  
USP37  
GDAP1  
LOH12CR1  
LIN9  
NECAP1  
AVL9  
TOLLIP  
AGA  
SPEN  
NUMB  
SLC25A25  
SCN8A

ZSWIM6  
ATG13  
DNMT3A  
SCYL2  
GALNT8  
OR2AE1  
ZFHX4  
CCNT1  
DCLRE1B  
IL19  
TAF8  
PIGS  
SMAD5  
SF3B3  
ORC1  
ATXN7L3B  
RPS6KA6  
TUBB  
PGAP2  
HOXC13  
PRC1  
CSRNP2  
PIIF  
DYNC1I2  
NCAPH  
ZNF711  
POLR2D  
SHPK  
LRP8  
SS18  
FRAS1  
NCL  
FANCI  
WNK2  
ZWILCH  
UHRF2  
PPP1R12A  
POLR2B  
RBM14-RBM4  
TAF5L  
SRGAP2P1  
LBX1  
ORAI2  
MBD1  
ZSCAN12  
GTSE1  
METTL2A  
MRPS18A  
AURKB  
C17orf53

KLHL2  
PCDHA12  
CALML5  
EPG5  
RNF41  
CXorf38  
GPANK1  
CADM4  
TRIM44  
RTF1  
RMI2  
ATXN10  
PKMYT1  
ATP10B  
SPOPL  
JUN  
PDF  
MCM2  
ROCK1  
HNRNPM  
H2AFV  
CDC6  
ZC3H10  
TLK2  
ZNF460  
PPP1R8  
KLHL24  
KALRN  
TMEM140  
SLC16A14  
FXC1  
APH1A  
MFSD2B  
DTL  
EIF4G2  
E2F8  
BRIP1  
ATAD5  
MAGEE1  
LMTK2  
RNF187  
EPHB1  
HDX  
KPNB1  
DEPDC1B  
SYCP2L  
RAD51  
ADCY3  
ZNF498  
ZDHHC13

ZNF233  
KIF23  
CNO  
C1orf112  
RGS2  
ANKRD36C  
FBXO21  
DVL3  
SMARCC2  
ATP2C1  
ACTG1  
PHF6  
GPR161  
ZNF391  
ZNF142  
WDR1  
GSPT2  
MAP4K4  
AFAP1L2  
NUP160  
RSRC1  
INSIG1  
TOP2A  
BCR  
RCN1  
C10orf12  
CBX3  
CCDC141  
RBMX  
ENOX2  
C12orf44  
KIF3C  
MED17  
CENPO  
GLUL  
C1orf52  
NCOR1  
CELF1  
CELF1  
KBTBD2  
CNP  
GMEB1  
KIF18B  
PRPF8  
KPNA2  
MINK1  
RRM2  
ABCB7  
RPS6KB1  
ZNF236

RBM15  
NOL11  
ASB8  
ARIH1  
ZNF407  
PBRM1  
ATRN  
ZNF518B  
CCNF  
ZNF207  
ARG2  
SEMA4C  
ZNF532  
ZNF192  
POLA1  
CBX1  
CS  
PLEKHM3  
UGT8  
ATP7A  
ANKRD52  
DYRK2
